# Supplementary material for: Common Genetic Variants and Risk for HPV Persistence and Progression to Cervical Cancer
Source: PLoS One. 2010 Jan 13;5(1):e8667. doi: 10.1371/journal.pone.0008667 (PMC2801608; doi:10.1371/journal.pone.0008667)
Supplement: Table S4 — (5.99 MB XLS) [file pone.0008667.s004.xls]

## Sheet: S3_table_20091022_cc1_2_3_aprio
/prj/eeb/costa/genetics/GSS_NHS/iSelect/Delivery.y2008m06d12/prog/compile.iselect.ors.adj_age.ccgrps_1.2.3.sas
Gene	SNP	Genotype	Randon Control N (%)	HPV Persistence N (%)	CIN3/Cancer N (%)	CIN3/Cancer vs RC OR (95% CI)	CIN3/Cancer vs HPV Persist OR (95% CI)	HPV persistence vs RC OR (95% CI)
ALKBH3	RS10768994	CC	129 (30)	92 (26)	108 (26)
		CT	207 (49)	184 (52)	221 (53)	1.34 (0.97-1.86)	1.06 (0.75-1.51)	1.24 (0.89-1.73)
		TT	89 (21)	80 (22)	85 (21)	1.14 (0.77-1.70)	0.92 (0.61-1.41)	1.27 (0.85-1.91)
						p-trend=0.4040	p-trend=0.7509	p-trend=0.2168
ALKBH3	RS10768995	GG	209 (49)	172 (48)	202 (49)
		CG	175 (41)	148 (42)	173 (42)	1.00 (0.75-1.34)	0.97 (0.72-1.32)	1.05 (0.78-1.41)
		CC	41 (10)	36 (10)	39 (9)	1.02 (0.63-1.67)	0.97 (0.58-1.62)	1.07 (0.66-1.76)
						p-trend=0.9338	p-trend=0.8585	p-trend=0.7144
ALKBH3	RS10838191	GG	210 (49)	168 (47)	186 (45)
		AG	174 (41)	146 (41)	200 (48)	1.30 (0.98-1.74)	1.23 (0.91-1.67)	1.05 (0.77-1.41)
		AA	41 (10)	42 (12)	28 (7)	0.77 (0.45-1.31)	0.62 (0.36-1.05)	1.27 (0.79-2.05)
						p-trend=0.7060	p-trend=0.5937	p-trend=0.3796
ALKBH3	RS10838192	TT	284 (67)	230 (65)	260 (63)
		CT	119 (28)	106 (30)	144 (35)	1.31 (0.97-1.77)	1.22 (0.89-1.67)	1.10 (0.80-1.50)
		CC	22 (5)	20 (6)	11 (3)	0.56 (0.26-1.19)	0.51 (0.23-1.11)	1.09 (0.58-2.06)
						p-trend=0.6758	p-trend=0.9162	p-trend=0.5781
ALKBH3	RS10838200	GG	343 (81)	284 (80)	324 (78)
		AG	77 (18)	69 (19)	89 (21)	1.26 (0.89-1.79)	1.12 (0.78-1.61)	1.09 (0.76-1.57)
		AA	4 (1)	3 (1)	2 (0)	0.47 (0.08-2.63)	0.87 (0.14-5.53)	0.91 (0.20-4.10)
						p-trend=0.3659	p-trend=0.5887	p-trend=0.7022
ALKBH3	RS11037690	GG	311 (73)	260 (73)	287 (69)
		AG	103 (24)	85 (24)	120 (29)	1.28 (0.94-1.75)	1.33 (0.95-1.85)	0.98 (0.71-1.37)
		AA	10 (2)	11 (3)	7 (2)	0.80 (0.29-2.16)	0.60 (0.22-1.62)	1.31 (0.55-3.13)
						p-trend=0.2826	p-trend=0.4028	p-trend=0.7984
ALKBH3	RS11037691	CC	355 (84)	299 (84)	348 (84)
		AC	66 (16)	56 (16)	66 (16)	0.97 (0.67-1.42)	0.98 (0.66-1.46)	1.02 (0.69-1.50)
		AA	4 (1)	1 (0)	1 (0)	0.39 (0.04-3.56)	1.60 (0.10-25.97)	0.27 (0.03-2.43)
						p-trend=0.6575	p-trend=0.9988	p-trend=0.6959
ALKBH3	RS11037726	TT	116 (27)	108 (30)	118 (29)
		AT	225 (53)	171 (48)	211 (51)	0.86 (0.62-1.19)	1.06 (0.75-1.49)	0.82 (0.59-1.14)
		AA	84 (20)	76 (21)	83 (20)	0.96 (0.64-1.44)	0.97 (0.64-1.47)	0.96 (0.64-1.44)
						p-trend=0.7602	p-trend=0.9315	p-trend=0.7141
ALKBH3	RS11037732	GG	295 (69)	238 (67)	273 (66)
		AG	114 (27)	105 (29)	133 (32)	1.25 (0.92-1.70)	1.12 (0.82-1.54)	1.14 (0.83-1.57)
		AA	16 (4)	13 (4)	9 (2)	0.63 (0.27-1.47)	0.61 (0.25-1.49)	0.97 (0.46-2.06)
						p-trend=0.5826	p-trend=0.9976	p-trend=0.5763
ALKBH3	RS12804822	TT	117 (28)	109 (31)	119 (29)
		GT	222 (52)	168 (47)	213 (52)	0.88 (0.64-1.22)	1.08 (0.77-1.52)	0.81 (0.58-1.13)
		GG	86 (20)	79 (22)	81 (20)	0.92 (0.61-1.37)	0.91 (0.60-1.38)	0.97 (0.65-1.45)
						p-trend=0.6233	p-trend=0.7365	p-trend=0.7711
ALKBH3	RS1554316	CC	293 (69)	239 (67)	273 (67)
		CT	115 (27)	101 (28)	128 (31)	1.19 (0.88-1.62)	1.13 (0.82-1.55)	1.08 (0.78-1.48)
		TT	16 (4)	16 (4)	9 (2)	0.63 (0.27-1.47)	0.51 (0.22-1.19)	1.18 (0.58-2.43)
						p-trend=0.7764	p-trend=0.7485	p-trend=0.5453
ALKBH3	RS1973717	GG	240 (57)	194 (54)	223 (54)
		AG	156 (37)	140 (39)	168 (40)	1.15 (0.86-1.53)	1.03 (0.76-1.39)	1.13 (0.84-1.52)
		AA	28 (7)	22 (6)	24 (6)	0.93 (0.52-1.66)	1.00 (0.53-1.87)	0.98 (0.54-1.77)
						p-trend=0.6497	p-trend=0.9098	p-trend=0.6374
ALKBH3	RS2292889	CC	314 (74)	262 (74)	308 (74)
		CG	102 (24)	83 (23)	99 (24)	1.00 (0.72-1.38)	0.98 (0.70-1.38)	0.98 (0.70-1.37)
		GG	9 (2)	11 (3)	8 (2)	0.91 (0.34-2.43)	0.63 (0.24-1.64)	1.50 (0.61-3.67)
						p-trend=0.9128	p-trend=0.5462	p-trend=0.6872
ALKBH3	RS2292891	TT	266 (63)	228 (64)	268 (65)
		CT	141 (33)	102 (29)	130 (31)	0.90 (0.67-1.22)	1.05 (0.76-1.45)	0.85 (0.62-1.16)
		CC	18 (4)	26 (7)	17 (4)	0.97 (0.48-1.94)	0.57 (0.29-1.09)	1.70 (0.91-3.18)
						p-trend=0.5902	p-trend=0.3523	p-trend=0.6626
ALKBH3	RS2434470	CC	332 (78)	278 (78)	322 (78)
		CG	87 (21)	69 (19)	87 (21)	1.03 (0.73-1.44)	1.06 (0.74-1.52)	0.95 (0.67-1.36)
		GG	5 (1)	9 (3)	5 (1)	1.04 (0.29-3.74)	0.49 (0.16-1.52)	2.19 (0.72-6.63)
						p-trend=0.8686	p-trend=0.6911	p-trend=0.6056
ALKBH3	RS2434473	CC	406 (98)	341 (97)	402 (98)
		CT	9 (2)	10 (3)	9 (2)	0.95 (0.37-2.45)	0.71 (0.28-1.80)	1.31 (0.52-3.26)
		TT	0 ()	0 ()	0 ()	(-)	(-)	(-)
						p-trend=0.9154	p-trend=0.4726	p-trend=0.5639
ALKBH3	RS2434484	TT	238 (56)	210 (59)	241 (58)
		GT	160 (38)	115 (32)	154 (37)	0.91 (0.68-1.22)	1.14 (0.83-1.55)	0.82 (0.61-1.12)
		GG	26 (6)	31 (9)	20 (5)	0.80 (0.43-1.48)	0.59 (0.32-1.08)	1.35 (0.78-2.36)
						p-trend=0.3867	p-trend=0.5120	p-trend=0.9916
ALKBH3	RS2460131	CC	144 (34)	123 (35)	142 (34)
		CG	206 (49)	163 (46)	198 (48)	0.96 (0.70-1.30)	1.06 (0.76-1.47)	0.93 (0.68-1.28)
		GG	73 (17)	70 (20)	75 (18)	1.06 (0.71-1.59)	0.96 (0.63-1.45)	1.13 (0.75-1.70)
						p-trend=0.8603	p-trend=0.9209	p-trend=0.6903
ALKBH3	RS2863000	CC	146 (34)	111 (31)	141 (34)
		CT	177 (42)	188 (53)	196 (48)	1.13 (0.83-1.54)	0.80 (0.57-1.11)	1.41 (1.02-1.95)
		TT	101 (24)	57 (16)	75 (18)	0.77 (0.53-1.13)	1.03 (0.67-1.59)	0.75 (0.50-1.12)
						p-trend=0.2933	p-trend=0.8130	p-trend=0.3905
ALKBH3	RS2902378	GG	283 (67)	243 (68)	282 (68)
		AG	128 (30)	91 (26)	124 (30)	0.97 (0.72-1.31)	1.17 (0.85-1.63)	0.84 (0.61-1.15)
		AA	13 (3)	22 (6)	9 (2)	0.70 (0.29-1.68)	0.34 (0.15-0.78)	1.98 (0.97-4.01)
						p-trend=0.5572	p-trend=0.3554	p-trend=0.6594
ALKBH3	RS3740983	TT	112 (26)	106 (30)	112 (27)
		GT	225 (53)	166 (47)	216 (52)	0.89 (0.64-1.24)	1.16 (0.82-1.63)	0.78 (0.56-1.09)
		GG	88 (21)	84 (24)	86 (21)	0.97 (0.65-1.45)	0.95 (0.63-1.43)	0.99 (0.66-1.48)
						p-trend=0.8216	p-trend=0.8596	p-trend=0.8570
ALKBH3	RS3740985	GG	220 (52)	184 (52)	218 (53)
		AG	164 (39)	152 (43)	166 (40)	0.99 (0.74-1.33)	0.87 (0.64-1.18)	1.11 (0.83-1.50)
		AA	41 (10)	20 (6)	31 (7)	0.75 (0.45-1.26)	1.25 (0.68-2.29)	0.58 (0.33-1.02)
						p-trend=0.4292	p-trend=0.9043	p-trend=0.3780
ALKBH3	RS3893853	CC	355 (84)	284 (80)	334 (80)
		CT	65 (15)	68 (19)	77 (19)	1.33 (0.92-1.93)	0.98 (0.68-1.43)	1.29 (0.88-1.87)
		TT	5 (1)	3 (1)	4 (1)	0.79 (0.21-3.03)	1.10 (0.23-5.18)	0.74 (0.18-3.14)
						p-trend=0.2430	p-trend=0.9699	p-trend=0.3291
ALKBH3	RS4755217	GG	111 (26)	81 (23)	97 (23)
		AG	208 (49)	184 (52)	220 (53)	1.24 (0.89-1.74)	1.01 (0.70-1.45)	1.21 (0.86-1.72)
		AA	106 (25)	91 (26)	96 (23)	1.05 (0.70-1.55)	0.91 (0.59-1.38)	1.19 (0.80-1.78)
						p-trend=0.8159	p-trend=0.6422	p-trend=0.3993
ALKBH3	RS7101434	CC	343 (81)	287 (81)	332 (80)
		CT	75 (18)	66 (19)	81 (20)	1.07 (0.75-1.52)	1.04 (0.72-1.51)	1.06 (0.73-1.52)
		TT	6 (1)	3 (1)	2 (0)	0.37 (0.07-1.88)	0.68 (0.11-4.37)	0.58 (0.14-2.37)
						p-trend=0.8463	p-trend=0.9479	p-trend=0.9309
ALKBH3	RS7103602	AA	143 (34)	121 (34)	140 (34)
		AG	188 (44)	169 (48)	201 (48)	1.06 (0.78-1.45)	0.96 (0.69-1.33)	1.07 (0.78-1.48)
		GG	94 (22)	65 (18)	74 (18)	0.80 (0.54-1.18)	0.91 (0.59-1.38)	0.82 (0.55-1.22)
						p-trend=0.3478	p-trend=0.6464	p-trend=0.4271
ALKBH3	RS7111355	AA	234 (55)	202 (57)	239 (58)
		AG	165 (39)	132 (37)	154 (37)	0.87 (0.65-1.16)	0.98 (0.72-1.33)	0.94 (0.70-1.27)
		GG	26 (6)	22 (6)	22 (5)	0.93 (0.51-1.72)	0.91 (0.48-1.73)	0.97 (0.53-1.77)
						p-trend=0.4447	p-trend=0.7829	p-trend=0.7564
ALKBH3	RS7120674	TT	347 (82)	296 (83)	355 (86)
		CT	73 (17)	55 (15)	57 (14)	0.75 (0.51-1.09)	0.85 (0.56-1.28)	0.89 (0.61-1.30)
		CC	4 (1)	5 (1)	3 (1)	0.96 (0.21-4.36)	0.60 (0.14-2.62)	1.42 (0.38-5.36)
						p-trend=0.1716	p-trend=0.3189	p-trend=0.7821
ALKBH3	RS7934642	CC	371 (87)	317 (89)	367 (88)
		AC	54 (13)	38 (11)	48 (12)	0.87 (0.57-1.33)	1.08 (0.68-1.71)	0.82 (0.53-1.28)
		AA	0 ()	1 (0)	0 ()	(-)	0.00 (0.00-I)	213354 (0.00-I)
						p-trend=0.5274	p-trend=0.8942	p-trend=0.5247
ALKBH3	RS868784	GG	123 (29)	106 (30)	112 (27)
		AG	204 (48)	175 (49)	222 (53)	1.20 (0.87-1.65)	1.19 (0.85-1.67)	0.99 (0.71-1.38)
		AA	98 (23)	75 (21)	81 (20)	0.90 (0.61-1.34)	1.01 (0.66-1.53)	0.88 (0.59-1.31)
						p-trend=0.7336	p-trend=0.8670	p-trend=0.5482
ALKBH3	RS883856	CC	186 (44)	156 (44)	187 (45)
		CT	182 (43)	170 (48)	190 (46)	1.02 (0.76-1.36)	0.87 (0.64-1.19)	1.11 (0.82-1.50)
		TT	57 (13)	30 (8)	38 (9)	0.64 (0.40-1.02)	1.01 (0.59-1.73)	0.63 (0.38-1.02)
						p-trend=0.1708	p-trend=0.6598	p-trend=0.2814
ALOXE3,PER1	RS6503086	TT	230 (54)	186 (52)	234 (56)
		GT	165 (39)	147 (41)	156 (38)	0.97 (0.72-1.29)	0.87 (0.64-1.17)	1.09 (0.81-1.47)
		GG	30 (7)	23 (6)	25 (6)	0.89 (0.50-1.57)	0.92 (0.50-1.70)	0.92 (0.52-1.64)
						p-trend=0.6780	p-trend=0.4398	p-trend=0.8478
APEX1	RS10131831	GG	337 (79)	278 (78)	305 (73)
		AG	84 (20)	76 (21)	107 (26)	1.35 (0.97-1.87)	1.17 (0.83-1.66)	1.08 (0.76-1.54)
		AA	4 (1)	2 (1)	3 (1)	0.76 (0.17-3.50)	1.23 (0.20-7.76)	0.66 (0.12-3.64)
						p-trend=0.1370	p-trend=0.3568	p-trend=0.8095
APEX1	RS1048945	GG	417 (98)	349 (98)	408 (98)
		CG	8 (2)	7 (2)	7 (2)	0.87 (0.31-2.45)	0.68 (0.23-1.98)	1.07 (0.38-2.99)
		CC	0 ()	0 ()	0 ()	(-)	(-)	(-)
						p-trend=0.7868	p-trend=0.4759	p-trend=0.8952
APEX1	RS11160682	AA	192 (45)	171 (48)	210 (51)
		AG	183 (43)	151 (42)	169 (41)	0.82 (0.61-1.10)	0.96 (0.71-1.31)	0.92 (0.69-1.25)
		GG	50 (12)	34 (10)	34 (8)	0.61 (0.37-0.99)	0.82 (0.48-1.39)	0.77 (0.47-1.24)
						p-trend=0.0320	p-trend=0.5173	p-trend=0.2932
APEX1	RS11624126	TT	206 (48)	186 (52)	210 (51)
		CT	184 (43)	145 (41)	168 (41)	0.88 (0.66-1.18)	1.07 (0.79-1.45)	0.87 (0.65-1.17)
		CC	35 (8)	25 (7)	32 (8)	0.88 (0.52-1.48)	1.14 (0.64-2.03)	0.79 (0.45-1.37)
						p-trend=0.4071	p-trend=0.5672	p-trend=0.2616
APEX1	RS12432116	GG	298 (70)	246 (70)	285 (69)
		GT	117 (28)	96 (27)	124 (30)	1.13 (0.83-1.54)	1.13 (0.81-1.56)	0.99 (0.72-1.36)
		TT	8 (2)	11 (3)	4 (1)	0.56 (0.16-1.90)	0.29 (0.09-0.94)	1.65 (0.65-4.17)
						p-trend=0.7501	p-trend=0.6883	p-trend=0.6176
APEX1	RS12878052	TT	214 (50)	172 (48)	201 (49)
		CT	181 (43)	160 (45)	173 (42)	1.08 (0.81-1.44)	0.92 (0.68-1.25)	1.09 (0.81-1.46)
		CC	30 (7)	24 (7)	40 (10)	1.47 (0.88-2.48)	1.56 (0.89-2.73)	0.98 (0.55-1.74)
						p-trend=0.1900	p-trend=0.4534	p-trend=0.7582
APEX1	RS1629478	GG	410 (97)	326 (92)	378 (91)
		CG	12 (3)	29 (8)	35 (8)	3.29 (1.67-6.50)	1.06 (0.62-1.79)	3.01 (1.51-6.00)
		CC	2 (0)	1 (0)	1 (0)	0.46 (0.04-5.14)	1.31 (0.08-21.45)	0.65 (0.06-7.27)
						p-trend=0.0051	p-trend=0.7974	p-trend=0.0092
APEX1	RS17111750	CC	238 (56)	221 (62)	255 (62)
		CT	159 (37)	116 (33)	137 (33)	0.81 (0.60-1.08)	1.07 (0.78-1.46)	0.78 (0.58-1.06)
		TT	28 (7)	19 (5)	22 (5)	0.71 (0.39-1.28)	1.03 (0.53-1.98)	0.74 (0.40-1.36)
						p-trend=0.0944	p-trend=0.7348	p-trend=0.0951
APEX1	RS1713459	CC	257 (60)	221 (62)	272 (66)
		CT	141 (33)	117 (33)	126 (30)	0.84 (0.62-1.13)	0.85 (0.62-1.17)	0.97 (0.72-1.31)
		TT	27 (6)	18 (5)	16 (4)	0.54 (0.28-1.04)	0.72 (0.35-1.47)	0.78 (0.42-1.45)
						p-trend=0.0511	p-trend=0.2073	p-trend=0.5166
APEX1	RS1713460	AA	191 (45)	163 (46)	201 (49)
		AG	182 (43)	148 (42)	172 (42)	0.90 (0.67-1.21)	0.92 (0.67-1.25)	0.96 (0.71-1.29)
		GG	50 (12)	45 (13)	39 (9)	0.73 (0.46-1.17)	0.72 (0.44-1.17)	1.06 (0.67-1.67)
						p-trend=0.1898	p-trend=0.2096	p-trend=0.9535
APEX1	RS17277375	CC	226 (53)	220 (62)	246 (59)
		CT	169 (40)	118 (33)	146 (35)	0.79 (0.59-1.06)	1.16 (0.85-1.59)	0.72 (0.53-0.97)
		TT	30 (7)	18 (5)	22 (5)	0.66 (0.36-1.18)	1.06 (0.54-2.06)	0.62 (0.34-1.15)
						p-trend=0.0549	p-trend=0.4498	p-trend=0.0160
APEX1	RS1760943	AA	409 (96)	330 (93)	384 (93)
		AG	15 (4)	26 (7)	31 (7)	2.19 (1.15-4.16)	1.04 (0.60-1.82)	2.18 (1.13-4.19)
		GG	1 (0)	0 ()	0 (0)	0.00 (0.00-I)	(-)	0.00 (0.00-I)
						p-trend=0.0470	p-trend=0.8890	p-trend=0.0463
APEX1	RS1760944	GG	134 (32)	89 (25)	119 (29)
		GT	203 (48)	180 (51)	199 (48)	1.10 (0.80-1.52)	0.81 (0.57-1.15)	1.34 (0.96-1.87)
		TT	87 (21)	87 (24)	95 (23)	1.29 (0.87-1.90)	0.86 (0.57-1.29)	1.49 (1.00-2.22)
						p-trend=0.2050	p-trend=0.4342	p-trend=0.0454
APEX1	RS1878705	AA	172 (40)	138 (39)	180 (43)
		AG	195 (46)	190 (53)	180 (43)	0.87 (0.64-1.16)	0.71 (0.52-0.97)	1.21 (0.90-1.64)
		GG	58 (14)	28 (8)	54 (13)	0.87 (0.57-1.35)	1.43 (0.85-2.40)	0.60 (0.37-1.00)
						p-trend=0.3876	p-trend=0.9402	p-trend=0.3913
APEX1	RS2184283	CC	110 (26)	85 (24)	95 (23)
		CG	205 (48)	180 (51)	214 (52)	1.21 (0.86-1.70)	1.09 (0.76-1.56)	1.13 (0.80-1.60)
		GG	108 (26)	91 (26)	106 (26)	1.12 (0.76-1.66)	1.00 (0.66-1.52)	1.09 (0.73-1.62)
						p-trend=0.5655	p-trend=0.9941	p-trend=0.6896
APEX1	RS2275008	TT	233 (55)	206 (58)	226 (55)
		CT	165 (39)	125 (35)	152 (37)	0.94 (0.70-1.25)	1.06 (0.78-1.45)	0.86 (0.64-1.16)
		CC	26 (6)	25 (7)	36 (9)	1.39 (0.81-2.40)	1.27 (0.73-2.21)	1.09 (0.61-1.95)
						p-trend=0.5854	p-trend=0.4220	p-trend=0.6542
APEX1	RS2319196	GG	267 (63)	245 (69)	270 (65)
		AG	142 (33)	97 (27)	128 (31)	0.88 (0.65-1.18)	1.14 (0.83-1.58)	0.75 (0.55-1.02)
		AA	16 (4)	14 (4)	17 (4)	1.04 (0.51-2.12)	1.03 (0.49-2.16)	0.95 (0.46-2.00)
						p-trend=0.5700	p-trend=0.5277	p-trend=0.1536
APEX1	RS3120073	TT	258 (61)	236 (66)	261 (63)
		CT	146 (35)	104 (29)	134 (32)	0.90 (0.67-1.21)	1.13 (0.82-1.55)	0.78 (0.57-1.06)
		CC	18 (4)	15 (4)	20 (5)	1.04 (0.53-2.03)	1.10 (0.54-2.23)	0.92 (0.45-1.86)
						p-trend=0.6775	p-trend=0.4946	p-trend=0.1969
APEX1	RS3136818	TT	405 (95)	328 (92)	380 (92)
		AT	18 (4)	26 (7)	34 (8)	1.97 (1.09-3.58)	1.10 (0.64-1.90)	1.82 (0.98-3.38)
		AA	2 (0)	2 (1)	1 (0)	0.38 (0.03-4.24)	0.48 (0.04-5.57)	1.26 (0.18-9.04)
						p-trend=0.0969	p-trend=0.9453	p-trend=0.0854
APEX1	RS4429194	GG	117 (28)	117 (33)	128 (31)
		CG	204 (48)	174 (49)	202 (49)	0.89 (0.65-1.23)	1.05 (0.76-1.47)	0.85 (0.62-1.19)
		CC	103 (24)	65 (18)	82 (20)	0.72 (0.49-1.06)	1.16 (0.76-1.77)	0.63 (0.42-0.94)
						p-trend=0.0993	p-trend=0.4895	p-trend=0.0280
APEX1	RS4465523	GG	224 (53)	214 (60)	245 (59)
		AG	173 (41)	124 (35)	146 (35)	0.77 (0.58-1.03)	1.09 (0.80-1.49)	0.75 (0.55-1.00)
		AA	28 (7)	18 (5)	23 (6)	0.72 (0.40-1.30)	1.08 (0.56-2.08)	0.68 (0.36-1.27)
						p-trend=0.0669	p-trend=0.6109	p-trend=0.0399
APEX1	RS7140314	GG	117 (28)	121 (34)	128 (32)
		CG	196 (47)	169 (48)	195 (48)	0.90 (0.65-1.25)	1.09 (0.79-1.52)	0.84 (0.60-1.16)
		CC	105 (25)	64 (18)	83 (20)	0.71 (0.48-1.04)	1.21 (0.80-1.85)	0.59 (0.40-0.88)
						p-trend=0.0877	p-trend=0.3613	p-trend=0.0120
APEX1	RS7150924	AA	112 (26)	81 (23)	111 (27)
		AG	213 (50)	193 (54)	210 (51)	1.03 (0.74-1.43)	0.85 (0.59-1.21)	1.25 (0.88-1.77)
		GG	100 (24)	82 (23)	94 (23)	0.95 (0.64-1.40)	0.86 (0.56-1.30)	1.16 (0.77-1.75)
						p-trend=0.7961	p-trend=0.4585	p-trend=0.4654
APEX1	RS7153128	AA	266 (63)	242 (68)	268 (65)
		AT	140 (33)	100 (28)	130 (31)	0.91 (0.68-1.23)	1.12 (0.81-1.55)	0.79 (0.58-1.08)
		TT	17 (4)	14 (4)	17 (4)	0.97 (0.48-1.96)	1.02 (0.49-2.15)	0.91 (0.44-1.88)
						p-trend=0.6161	p-trend=0.5855	p-trend=0.2111
APEX1	RS8003245	AA	181 (43)	171 (48)	197 (48)
		AT	204 (48)	142 (40)	166 (40)	0.75 (0.56-1.00)	1.07 (0.78-1.46)	0.73 (0.54-0.98)
		TT	39 (9)	43 (12)	49 (12)	1.10 (0.68-1.76)	0.99 (0.62-1.59)	1.17 (0.72-1.90)
						p-trend=0.4909	p-trend=0.8650	p-trend=0.5904
APEX1	RS8015748	CC	184 (43)	172 (48)	200 (48)
		CT	202 (48)	141 (40)	165 (40)	0.76 (0.56-1.01)	1.08 (0.79-1.48)	0.74 (0.55-0.99)
		TT	38 (9)	43 (12)	48 (12)	1.10 (0.68-1.77)	0.96 (0.60-1.53)	1.21 (0.75-1.97)
						p-trend=0.5034	p-trend=0.9346	p-trend=0.6784
APEX1	RS8017603	CC	145 (34)	121 (34)	135 (33)
		CT	208 (49)	178 (50)	208 (50)	1.13 (0.83-1.55)	1.09 (0.78-1.50)	1.00 (0.73-1.38)
		TT	72 (17)	57 (16)	72 (17)	1.03 (0.69-1.55)	1.06 (0.69-1.65)	0.94 (0.62-1.44)
						p-trend=0.7379	p-trend=0.7121	p-trend=0.8229
APEX1	RS8017682	GG	347 (82)	301 (85)	360 (87)
		AG	74 (17)	54 (15)	52 (13)	0.67 (0.45-0.98)	0.82 (0.54-1.25)	0.84 (0.57-1.23)
		AA	4 (1)	1 (0)	2 (0)	0.40 (0.07-2.24)	1.36 (0.12-15.57)	0.29 (0.03-2.64)
						p-trend=0.0237	p-trend=0.4271	p-trend=0.2061
APEX1	RS8019594	TT	164 (39)	130 (37)	156 (38)
		GT	204 (48)	161 (45)	189 (46)	1.00 (0.74-1.35)	0.98 (0.71-1.36)	0.99 (0.73-1.35)
		GG	56 (13)	65 (18)	66 (16)	1.29 (0.84-1.97)	0.85 (0.55-1.30)	1.47 (0.96-2.24)
						p-trend=0.3440	p-trend=0.4987	p-trend=0.1493
APEX1	RS938881	TT	112 (27)	66 (19)	98 (24)
		AT	208 (49)	182 (51)	201 (49)	1.11 (0.79-1.55)	0.74 (0.51-1.09)	1.49 (1.03-2.14)
		AA	102 (24)	106 (30)	111 (27)	1.30 (0.88-1.91)	0.73 (0.48-1.10)	1.75 (1.17-2.64)
						p-trend=0.1882	p-trend=0.1570	p-trend=0.0080
APEX1	RS938882	GG	113 (28)	118 (34)	124 (31)
		AG	199 (49)	173 (50)	202 (51)	0.89 (0.64-1.23)	1.08 (0.78-1.51)	0.84 (0.61-1.17)
		AA	97 (24)	53 (15)	74 (19)	0.67 (0.45-1.00)	1.27 (0.82-1.98)	0.53 (0.35-0.81)
						p-trend=0.0561	p-trend=0.3004	p-trend=0.0044
APEX1	RS938883	TT	121 (29)	127 (36)	126 (31)
		CT	197 (46)	176 (49)	196 (49)	0.93 (0.67-1.28)	1.10 (0.80-1.53)	0.86 (0.62-1.19)
		CC	106 (25)	53 (15)	82 (20)	0.71 (0.48-1.04)	1.50 (0.97-2.31)	0.48 (0.32-0.73)
						p-trend=0.0913	p-trend=0.0854	p-trend=0.0010
APEX1	RS938885	AA	411 (97)	344 (97)	392 (94)
		AC	14 (3)	12 (3)	23 (6)	1.59 (0.80-3.18)	1.62 (0.78-3.36)	1.02 (0.46-2.24)
		CC	0 ()	0 ()	0 ()	(-)	(-)	(-)
						p-trend=0.1848	p-trend=0.1976	p-trend=0.9621
APEX1	RS938888	CC	406 (96)	343 (96)	398 (96)
		CT	18 (4)	13 (4)	17 (4)	0.95 (0.48-1.89)	1.11 (0.52-2.36)	0.85 (0.41-1.77)
		TT	1 (0)	0 ()	0 (0)	0.00 (0.00-I)	(-)	0.00 (0.00-I)
						p-trend=0.6667	p-trend=0.7802	p-trend=0.4763
APEX1	RS938889	CC	142 (33)	82 (23)	107 (26)
		CT	196 (46)	189 (53)	215 (52)	1.47 (1.07-2.03)	0.89 (0.62-1.27)	1.67 (1.19-2.34)
		TT	86 (20)	85 (24)	88 (21)	1.45 (0.98-2.15)	0.81 (0.53-1.24)	1.70 (1.13-2.54)
						p-trend=0.0424	p-trend=0.3342	p-trend=0.0068
APEX1	RS938890	GG	139 (33)	77 (22)	104 (25)
		AG	189 (45)	190 (53)	214 (52)	1.53 (1.11-2.12)	0.85 (0.59-1.22)	1.82 (1.29-2.57)
		AA	96 (23)	89 (25)	96 (23)	1.42 (0.96-2.09)	0.82 (0.54-1.25)	1.66 (1.11-2.48)
						p-trend=0.0558	p-trend=0.3537	p-trend=0.0098
APEX1	RS938891	GG	152 (36)	96 (27)	124 (30)
		CG	193 (46)	185 (52)	209 (51)	1.35 (0.99-1.85)	0.88 (0.63-1.24)	1.53 (1.10-2.11)
		CC	79 (19)	75 (21)	78 (19)	1.29 (0.87-1.93)	0.82 (0.54-1.25)	1.50 (1.00-2.26)
						p-trend=0.1263	p-trend=0.3400	p-trend=0.0264
APEX1	RS999692	TT	196 (46)	176 (49)	211 (51)
		CT	186 (44)	151 (42)	170 (41)	0.83 (0.62-1.11)	0.96 (0.71-1.30)	0.91 (0.67-1.22)
		CC	43 (10)	29 (8)	31 (8)	0.65 (0.39-1.08)	0.88 (0.50-1.55)	0.75 (0.45-1.25)
						p-trend=0.0640	p-trend=0.6408	p-trend=0.2546
APEX2	RS12009010	AA	414 (97)	346 (97)	394 (95)
		AC	11 (3)	10 (3)	21 (5)	1.82 (0.86-3.86)	1.76 (0.81-3.86)	1.11 (0.46-2.64)
		CC	0 ()	0 ()	0 ()	(-)	(-)	(-)
						p-trend=0.1181	p-trend=0.1542	p-trend=0.8197
APEX2	RS17250674	GG	410 (96)	344 (97)	403 (97)
		AG	15 (4)	12 (3)	12 (3)	0.80 (0.37-1.75)	0.89 (0.39-2.05)	0.94 (0.43-2.04)
		AA	0 ()	0 ()	0 ()	(-)	(-)	(-)
						p-trend=0.5752	p-trend=0.7898	p-trend=0.8752
APEX2	RS2301417	AA	425 ()	356 ()	415 ()
		AG	0 ()	0 ()	0 ()	(-)	(-)	(-)
		GG	0 ()	0 ()	0 ()	(-)	(-)	(-)
						p-trend=	p-trend=	p-trend=
APEX2	RS6612250	TT	409 (96)	343 (96)	386 (93)
		GT	16 (4)	12 (3)	29 (7)	1.79 (0.95-3.37)	2.00 (0.99-4.03)	0.91 (0.42-1.96)
		GG	0 ()	1 (0)	0 ()	(-)	0.00 (0.00-I)	218903 (0.00-I)
						p-trend=0.0724	p-trend=0.1065	p-trend=0.8825
APEX2	RS6612253	AA	420 (99)	350 (98)	404 (97)
		AG	5 (1)	6 (2)	11 (3)	2.11 (0.72-6.20)	1.53 (0.55-4.27)	1.46 (0.44-4.82)
		GG	0 ()	0 ()	0 ()	(-)	(-)	(-)
						p-trend=0.1752	p-trend=0.4158	p-trend=0.5374
APEX2	RS704145	CC	176 (41)	129 (36)	154 (37)
		CT	184 (43)	162 (46)	192 (46)	1.19 (0.88-1.61)	1.00 (0.72-1.38)	1.19 (0.87-1.62)
		TT	65 (15)	65 (18)	69 (17)	1.17 (0.78-1.76)	0.89 (0.58-1.36)	1.35 (0.90-2.05)
						p-trend=0.3191	p-trend=0.6419	p-trend=0.1249
APEX2	RS7058927	AA	399 (94)	327 (92)	382 (92)
		AG	25 (6)	28 (8)	32 (8)	1.31 (0.76-2.27)	0.88 (0.51-1.51)	1.42 (0.81-2.49)
		GG	1 (0)	0 (0)	1 (0)	0.97 (0.06-15.87)	109069 (0.00-I)	0.00 (0.00-I)
						p-trend=0.3739	p-trend=0.7823	p-trend=0.3551
APEX2	RS7059574	TT	404 (95)	345 (97)	397 (96)
		GT	20 (5)	11 (3)	18 (4)	0.92 (0.48-1.78)	1.41 (0.64-3.07)	0.65 (0.31-1.38)
		GG	0 ()	0 ()	0 ()	(-)	(-)	(-)
						p-trend=0.8059	p-trend=0.3917	p-trend=0.2646
APEX2	RS7881427	TT	382 (90)	320 (90)	357 (86)
		CT	41 (10)	34 (10)	56 (13)	1.44 (0.94-2.23)	1.47 (0.92-2.33)	0.99 (0.62-1.60)
		CC	2 (0)	2 (1)	2 (0)	1.08 (0.15-7.92)	1.16 (0.15-8.69)	1.27 (0.18-9.11)
						p-trend=0.1209	p-trend=0.1250	p-trend=0.9417
APTX	RS10813912	GG	184 (43)	162 (46)	175 (42)
		AG	196 (46)	151 (42)	191 (46)	1.07 (0.80-1.44)	1.18 (0.87-1.61)	0.87 (0.64-1.17)
		AA	45 (11)	43 (12)	49 (12)	1.14 (0.72-1.81)	1.06 (0.66-1.70)	1.08 (0.68-1.73)
						p-trend=0.5232	p-trend=0.5184	p-trend=0.8629
APTX	RS10813916	TT	294 (69)	245 (69)	292 (70)
		CT	116 (27)	102 (29)	108 (26)	0.95 (0.70-1.30)	0.88 (0.63-1.22)	1.05 (0.77-1.44)
		CC	15 (4)	9 (3)	15 (4)	0.92 (0.44-1.94)	1.30 (0.54-3.09)	0.71 (0.30-1.65)
						p-trend=0.7276	p-trend=0.7898	p-trend=0.8370
APTX	RS10971249	AA	363 (85)	304 (85)	345 (83)
		AG	62 (15)	51 (14)	65 (16)	1.11 (0.76-1.64)	1.12 (0.74-1.68)	0.99 (0.66-1.48)
		GG	0 (0)	1 (0)	5 (1)	1383242 (0.00-I)	4.00 (0.45-35.58)	232062 (0.00-I)
						p-trend=0.1941	p-trend=0.3023	p-trend=0.8733
APTX	RS10971259	CC	283 (67)	249 (70)	283 (68)
		CT	136 (32)	95 (27)	122 (29)	0.89 (0.66-1.20)	1.19 (0.86-1.65)	0.79 (0.58-1.09)
		TT	6 (1)	12 (3)	10 (2)	1.74 (0.61-4.95)	0.77 (0.32-1.85)	2.23 (0.82-6.04)
						p-trend=0.8601	p-trend=0.6174	p-trend=0.6942
APTX	RS10971263	AA	390 (92)	332 (93)	387 (93)
		AG	35 (8)	23 (6)	28 (7)	0.81 (0.48-1.37)	1.03 (0.58-1.85)	0.77 (0.45-1.33)
		GG	0 ()	1 (0)	0 ()	(-)	0.00 (0.00-I)	215455 (0.00-I)
						p-trend=0.4292	p-trend=0.9129	p-trend=0.5280
APTX	RS10971316	GG	143 (34)	129 (36)	134 (32)
		AG	210 (49)	169 (47)	211 (51)	1.12 (0.82-1.52)	1.21 (0.87-1.67)	0.89 (0.65-1.22)
		AA	72 (17)	58 (16)	70 (17)	1.05 (0.70-1.58)	1.16 (0.75-1.79)	0.89 (0.59-1.36)
						p-trend=0.7046	p-trend=0.3763	p-trend=0.5134
APTX	RS10971333	TT	344 (81)	291 (82)	336 (81)
		CT	77 (18)	61 (17)	75 (18)	0.99 (0.69-1.42)	1.14 (0.78-1.67)	0.93 (0.64-1.35)
		CC	3 (1)	4 (1)	3 (1)	1.06 (0.21-5.45)	0.76 (0.16-3.51)	1.59 (0.35-7.16)
						p-trend=0.9936	p-trend=0.6603	p-trend=0.9224
APTX	RS13296038	CC	399 (94)	336 (95)	396 (96)
		CT	26 (6)	19 (5)	16 (4)	0.66 (0.35-1.27)	0.72 (0.36-1.44)	0.86 (0.47-1.58)
		TT	0 ()	0 ()	0 ()	(-)	(-)	(-)
						p-trend=0.2149	p-trend=0.3491	p-trend=0.6247
APTX	RS1888869	GG	116 (27)	102 (29)	133 (32)
		CG	222 (52)	172 (48)	204 (49)	0.78 (0.57-1.08)	0.89 (0.64-1.25)	0.89 (0.64-1.24)
		CC	86 (20)	82 (23)	78 (19)	0.76 (0.51-1.14)	0.69 (0.46-1.05)	1.09 (0.73-1.64)
						p-trend=0.1481	p-trend=0.0889	p-trend=0.7405
ATM	RS10160256	CC	414 (97)	350 (98)	399 (96)
		CT	11 (3)	6 (2)	16 (4)	1.51 (0.68-3.33)	2.02 (0.77-5.32)	0.63 (0.23-1.73)
		TT	0 ()	0 ()	0 ()	(-)	(-)	(-)
						p-trend=0.3087	p-trend=0.1535	p-trend=0.3746
ATM	RS11212570	GG	390 (92)	334 (94)	388 (93)
		AG	34 (8)	22 (6)	27 (7)	0.77 (0.45-1.32)	1.09 (0.60-1.97)	0.76 (0.43-1.32)
		AA	1 (0)	0 ()	0 (0)	0.00 (0.00-I)	(-)	0.00 (0.00-I)
						p-trend=0.2725	p-trend=0.7837	p-trend=0.2320
ATM	RS11212592	AA	185 (44)	165 (47)	178 (43)
		AG	200 (47)	155 (44)	183 (44)	0.94 (0.71-1.26)	1.05 (0.77-1.43)	0.87 (0.64-1.17)
		GG	38 (9)	34 (10)	53 (13)	1.41 (0.88-2.25)	1.31 (0.80-2.15)	1.00 (0.60-1.67)
						p-trend=0.3863	p-trend=0.3408	p-trend=0.6252
ATM	RS17503908	TT	366 (86)	301 (85)	375 (90)
		GT	56 (13)	54 (15)	40 (10)	0.70 (0.45-1.09)	0.58 (0.37-0.90)	1.18 (0.79-1.77)
		GG	3 (1)	1 (0)	0 (0)	0.00 (0.00-I)	0.00 (0.00-I)	0.40 (0.04-3.84)
						p-trend=0.0422	p-trend=0.0105	p-trend=0.6583
ATM	RS1800056	TT	421 (99)	354 (99)	413 (100)
		CT	4 (1)	2 (1)	2 (0)	0.47 (0.08-2.59)	0.65 (0.09-4.72)	0.60 (0.11-3.30)
		CC	0 ()	0 ()	0 ()	(-)	(-)	(-)
						p-trend=0.3836	p-trend=0.6675	p-trend=0.5542
ATM	RS1800057	CC	419 (99)	348 (98)	410 (99)
		CG	6 (1)	8 (2)	5 (1)	0.83 (0.25-2.77)	0.44 (0.14-1.39)	1.65 (0.57-4.81)
		GG	0 ()	0 ()	0 ()	(-)	(-)	(-)
						p-trend=0.7601	p-trend=0.1633	p-trend=0.3584
ATM	RS1800889	CC	402 (95)	337 (95)	395 (95)
		CT	22 (5)	19 (5)	19 (5)	0.87 (0.46-1.65)	1.00 (0.51-1.95)	1.02 (0.54-1.91)
		TT	1 (0)	0 (0)	1 (0)	1.44 (0.09-23.40)	324911 (0.00-I)	0.00 (0.00-I)
						p-trend=0.7770	p-trend=0.7059	p-trend=0.8212
ATM	RS1801516	GG	360 (85)	313 (88)	360 (87)
		AG	61 (14)	41 (12)	52 (13)	0.92 (0.61-1.37)	1.21 (0.77-1.89)	0.77 (0.50-1.17)
		AA	4 (1)	2 (1)	3 (1)	0.65 (0.14-3.00)	1.05 (0.17-6.64)	0.58 (0.11-3.21)
						p-trend=0.5332	p-trend=0.4464	p-trend=0.1761
ATM	RS183459	TT	183 (43)	151 (42)	195 (47)
		GT	196 (47)	169 (47)	168 (41)	0.78 (0.59-1.05)	0.82 (0.60-1.11)	1.04 (0.77-1.40)
		GG	42 (10)	36 (10)	49 (12)	1.10 (0.69-1.75)	1.11 (0.68-1.81)	1.04 (0.63-1.71)
						p-trend=0.6205	p-trend=0.7694	p-trend=0.8132
ATM	RS2234997	TT	392 (92)	331 (93)	369 (89)
		AT	33 (8)	25 (7)	44 (11)	1.46 (0.90-2.37)	1.55 (0.92-2.62)	0.90 (0.53-1.55)
		AA	0 (0)	0 (0)	2 (0)	542700 (0.00-I)	450610 (0.00-I)	(-)
						p-trend=0.0588	p-trend=0.0519	p-trend=0.7102
ATM	RS227062	AA	154 (36)	133 (37)	159 (38)
		AG	214 (50)	172 (48)	188 (46)	0.84 (0.62-1.13)	0.99 (0.72-1.36)	0.93 (0.68-1.26)
		GG	57 (13)	51 (14)	66 (16)	1.12 (0.73-1.71)	1.15 (0.74-1.78)	1.04 (0.67-1.62)
						p-trend=0.9877	p-trend=0.6424	p-trend=0.9614
ATM	RS227073	CC	149 (35)	124 (35)	149 (36)
		CG	210 (50)	173 (49)	196 (47)	0.93 (0.69-1.26)	1.02 (0.74-1.41)	0.98 (0.72-1.34)
		GG	64 (15)	59 (17)	68 (16)	1.06 (0.70-1.60)	1.04 (0.67-1.60)	1.11 (0.72-1.70)
						p-trend=0.9489	p-trend=0.8638	p-trend=0.7134
ATM	RS228593	GG	139 (33)	119 (33)	129 (31)
		AG	220 (52)	178 (50)	199 (48)	0.96 (0.71-1.32)	1.01 (0.73-1.41)	0.94 (0.69-1.29)
		AA	66 (16)	59 (17)	87 (21)	1.38 (0.92-2.06)	1.22 (0.80-1.87)	1.05 (0.68-1.61)
						p-trend=0.1946	p-trend=0.4065	p-trend=0.9396
ATM	RS228606	TT	110 (26)	90 (25)	117 (28)
		GT	214 (50)	185 (52)	192 (46)	0.85 (0.61-1.18)	0.86 (0.61-1.22)	1.05 (0.75-1.48)
		GG	101 (24)	81 (23)	105 (25)	1.00 (0.68-1.47)	1.11 (0.74-1.68)	0.98 (0.65-1.46)
						p-trend=0.9720	p-trend=0.6381	p-trend=0.9208
ATM	RS3218693	AA	402 (95)	339 (95)	389 (94)
		AG	22 (5)	16 (5)	22 (5)	1.06 (0.57-1.97)	1.25 (0.64-2.47)	0.88 (0.46-1.71)
		GG	0 (0)	0 (0)	1 (0)	244486 (0.00-I)	217327 (0.00-I)	(-)
						p-trend=0.6109	p-trend=0.3462	p-trend=0.7111
ATM	RS4987886	AA	412 (97)	342 (96)	408 (98)
		AT	13 (3)	14 (4)	7 (2)	0.52 (0.20-1.33)	0.42 (0.16-1.07)	1.28 (0.60-2.77)
		TT	0 ()	0 ()	0 ()	(-)	(-)	(-)
						p-trend=0.1736	p-trend=0.0690	p-trend=0.5231
ATM	RS4987907	AA	416 (98)	347 (97)	403 (97)
		AG	9 (2)	8 (2)	12 (3)	1.41 (0.58-3.43)	1.13 (0.45-2.86)	1.09 (0.41-2.85)
		GG	0 ()	1 (0)	0 ()	(-)	0.00 (0.00-I)	273166 (0.00-I)
						p-trend=0.4476	p-trend=0.7660	p-trend=0.5137
ATM	RS4987923	CC	422 (99)	352 (99)	412 (99)
		CG	3 (1)	4 (1)	3 (1)	1.09 (0.22-5.55)	0.63 (0.14-2.91)	1.61 (0.36-7.25)
		GG	0 ()	0 ()	0 ()	(-)	(-)	(-)
						p-trend=0.9144	p-trend=0.5532	p-trend=0.5353
ATM	RS4987961	CC	420 (99)	351 (99)	409 (99)
		CT	5 (1)	5 (1)	6 (1)	1.38 (0.41-4.68)	1.00 (0.29-3.43)	1.17 (0.34-4.09)
		TT	0 ()	0 ()	0 ()	(-)	(-)	(-)
						p-trend=0.6078	p-trend=0.9963	p-trend=0.8038
ATM	RS4987991	GG	402 (95)	334 (96)	380 (95)
		AG	19 (5)	14 (4)	20 (5)	1.14 (0.59-2.19)	1.43 (0.69-2.94)	0.90 (0.44-1.83)
		AA	0 (0)	0 (0)	1 (0)	249871 (0.00-I)	214558 (0.00-I)	(-)
						p-trend=0.4741	p-trend=0.2112	p-trend=0.7692
ATM	RS4988026	TT	422 (99)	351 (99)	410 (99)
		CT	3 (1)	5 (1)	5 (1)	1.41 (0.33-5.99)	0.69 (0.19-2.47)	2.11 (0.50-8.91)
		CC	0 ()	0 ()	0 ()	(-)	(-)	(-)
						p-trend=0.6440	p-trend=0.5704	p-trend=0.3107
ATM	RS4988044	TT	415 (98)	353 (99)	411 (99)
		CT	9 (2)	3 (1)	4 (1)	0.47 (0.14-1.55)	1.22 (0.26-5.71)	0.38 (0.10-1.43)
		CC	0 ()	0 ()	0 ()	(-)	(-)	(-)
						p-trend=0.2133	p-trend=0.7986	p-trend=0.1543
ATM	RS4988059	GG	415 (98)	348 (98)	404 (97)
		AG	9 (2)	8 (2)	11 (3)	1.23 (0.50-3.03)	1.31 (0.51-3.36)	1.07 (0.41-2.80)
		AA	0 ()	0 ()	0 ()	(-)	(-)	(-)
						p-trend=0.6536	p-trend=0.5768	p-trend=0.8949
ATM	RS4988074	GG	416 (98)	350 (98)	396 (95)
		CG	9 (2)	6 (2)	19 (5)	2.30 (1.02-5.20)	2.61 (1.01-6.71)	0.75 (0.26-2.14)
		CC	0 ()	0 ()	0 ()	(-)	(-)	(-)
						p-trend=0.0456	p-trend=0.0470	p-trend=0.5956
ATM	RS4988077	CC	410 (97)	341 (96)	399 (96)
		CG	13 (3)	14 (4)	16 (4)	1.26 (0.59-2.68)	1.02 (0.48-2.17)	1.30 (0.60-2.81)
		GG	0 ()	1 (0)	0 ()	(-)	0.00 (0.00-I)	232668 (0.00-I)
						p-trend=0.5489	p-trend=0.7795	p-trend=0.3157
ATM	RS4988084	TT	383 (90)	322 (90)	359 (87)
		CT	42 (10)	34 (10)	52 (13)	1.33 (0.86-2.07)	1.35 (0.85-2.16)	0.97 (0.60-1.56)
		CC	0 (0)	0 (0)	4 (1)	1647681 (0.00-I)	1396192 (0.00-I)	(-)
						p-trend=0.0490	p-trend=0.0570	p-trend=0.9025
ATM	RS4988099	AA	424 (100)	355 (100)	415 (100)
		AG	1 (0)	1 (0)	0 (0)	0.00 (0.00-I)	0.00 (0.00-I)	1.24 (0.08-19.91)
		GG	0 ()	0 ()	0 ()	(-)	(-)	(-)
						p-trend=0.9776	p-trend=0.9784	p-trend=0.8810
ATM	RS4988101	CC	403 (95)	338 (95)	389 (94)
		CT	22 (5)	18 (5)	25 (6)	1.21 (0.66-2.20)	1.24 (0.65-2.35)	1.00 (0.53-1.90)
		TT	0 (0)	0 (0)	1 (0)	247371 (0.00-I)	219337 (0.00-I)	(-)
						p-trend=0.3691	p-trend=0.3516	p-trend=0.9996
ATM	RS4988111	TT	423 (100)	351 (99)	413 (100)
		CT	2 (0)	5 (1)	2 (0)	1.03 (0.14-7.59)	0.45 (0.08-2.38)	3.04 (0.58-15.77)
		CC	0 ()	0 ()	0 ()	(-)	(-)	(-)
						p-trend=0.9757	p-trend=0.3445	p-trend=0.1863
ATM	RS595747	TT	187 (44)	161 (45)	206 (50)
		CT	203 (48)	160 (45)	165 (40)	0.73 (0.54-0.97)	0.88 (0.64-1.19)	0.91 (0.67-1.22)
		CC	35 (8)	35 (10)	44 (11)	1.10 (0.67-1.79)	1.01 (0.61-1.67)	1.17 (0.70-1.96)
						p-trend=0.3725	p-trend=0.7016	p-trend=0.9448
ATM	RS609261	CC	148 (35)	128 (36)	154 (37)
		CT	206 (49)	173 (49)	186 (45)	0.86 (0.63-1.16)	0.96 (0.70-1.33)	0.97 (0.71-1.32)
		TT	67 (16)	55 (15)	73 (18)	1.04 (0.69-1.57)	1.18 (0.77-1.82)	0.95 (0.62-1.46)
						p-trend=0.9062	p-trend=0.5724	p-trend=0.7953
ATM	RS618499	GG	199 (47)	171 (48)	214 (52)
		AG	190 (45)	150 (42)	155 (37)	0.74 (0.56-0.99)	0.89 (0.65-1.22)	0.91 (0.68-1.23)
		AA	36 (8)	35 (10)	46 (11)	1.17 (0.72-1.90)	1.07 (0.65-1.76)	1.14 (0.68-1.89)
						p-trend=0.5624	p-trend=0.8826	p-trend=0.9781
ATM	RS662218	AA	214 (50)	179 (50)	222 (54)
		AC	181 (43)	147 (41)	158 (38)	0.83 (0.62-1.11)	0.95 (0.70-1.30)	0.96 (0.72-1.29)
		CC	29 (7)	29 (8)	34 (8)	1.11 (0.65-1.90)	1.00 (0.58-1.73)	1.21 (0.69-2.10)
						p-trend=0.6138	p-trend=0.8677	p-trend=0.7742
ATM	RS664677	TT	203 (48)	172 (48)	215 (52)
		CT	186 (44)	150 (42)	157 (38)	0.78 (0.58-1.05)	0.91 (0.67-1.24)	0.95 (0.70-1.27)
		CC	36 (8)	34 (10)	43 (10)	1.13 (0.69-1.85)	1.04 (0.63-1.73)	1.12 (0.67-1.86)
						p-trend=0.5951	p-trend=0.8612	p-trend=0.9162
ATM	RS672655	GG	146 (34)	123 (35)	146 (35)
		AG	212 (50)	171 (48)	198 (48)	0.93 (0.68-1.26)	1.06 (0.77-1.47)	0.96 (0.70-1.31)
		AA	67 (16)	62 (17)	71 (17)	1.05 (0.70-1.59)	1.03 (0.67-1.58)	1.10 (0.72-1.68)
						p-trend=0.9498	p-trend=0.8258	p-trend=0.7651
ATM	RS7942747	CC	397 (93)	333 (94)	371 (89)
		CT	28 (7)	23 (6)	42 (10)	1.67 (1.00-2.77)	1.62 (0.94-2.79)	0.98 (0.55-1.74)
		TT	0 (0)	0 (0)	2 (0)	546569 (0.00-I)	450599 (0.00-I)	(-)
						p-trend=0.0211	p-trend=0.0400	p-trend=0.9506
ATR	RS10804682	GG	348 (82)	282 (79)	338 (82)
		AG	71 (17)	72 (20)	71 (17)	1.05 (0.73-1.52)	0.83 (0.57-1.20)	1.26 (0.88-1.82)
		AA	5 (1)	2 (1)	5 (1)	0.97 (0.27-3.45)	2.09 (0.39-11.31)	0.52 (0.10-2.70)
						p-trend=0.8246	p-trend=0.5801	p-trend=0.4235
ATR	RS11920625	GG	388 (91)	315 (88)	374 (90)
		AG	37 (9)	41 (12)	40 (10)	1.22 (0.76-1.97)	0.84 (0.52-1.34)	1.37 (0.86-2.20)
		AA	0 (0)	0 (0)	1 (0)	149809 (0.00-I)	109275 (0.00-I)	(-)
						p-trend=0.3183	p-trend=0.5782	p-trend=0.1854
ATR	RS11923612	TT	220 (52)	174 (49)	196 (47)
		CT	174 (41)	149 (42)	184 (44)	1.17 (0.88-1.56)	1.09 (0.81-1.48)	1.10 (0.82-1.48)
		CC	31 (7)	33 (9)	35 (8)	1.30 (0.76-2.21)	0.97 (0.57-1.66)	1.37 (0.81-2.33)
						p-trend=0.1969	p-trend=0.8054	p-trend=0.2484
ATR	RS12629684	AA	422 (99)	355 (100)	409 (99)
		AG	3 (1)	1 (0)	6 (1)	2.62 (0.64-10.78)	5.99 (0.71-50.85)	0.36 (0.04-3.50)
		GG	0 ()	0 ()	0 ()	(-)	(-)	(-)
						p-trend=0.1805	p-trend=0.1009	p-trend=0.3792
ATR	RS12635931	TT	256 (60)	215 (60)	256 (62)
		CT	146 (34)	123 (35)	137 (33)	0.97 (0.73-1.31)	0.94 (0.69-1.28)	0.99 (0.73-1.34)
		CC	23 (5)	18 (5)	22 (5)	0.94 (0.51-1.75)	1.01 (0.52-1.96)	0.94 (0.50-1.80)
						p-trend=0.8108	p-trend=0.7949	p-trend=0.8719
ATR	RS13066441	AA	213 (50)	166 (47)	190 (46)
		AC	180 (42)	156 (44)	190 (46)	1.18 (0.88-1.57)	1.07 (0.79-1.45)	1.13 (0.84-1.51)
		CC	31 (7)	33 (9)	35 (8)	1.30 (0.76-2.21)	0.96 (0.56-1.64)	1.39 (0.82-2.37)
						p-trend=0.1942	p-trend=0.8920	p-trend=0.2014
ATR	RS13067795	AA	113 (27)	116 (33)	133 (32)
		AC	218 (51)	162 (46)	193 (47)	0.75 (0.54-1.03)	1.06 (0.76-1.48)	0.71 (0.51-0.99)
		CC	94 (22)	78 (22)	86 (21)	0.75 (0.51-1.12)	0.96 (0.64-1.43)	0.80 (0.54-1.20)
						p-trend=0.1237	p-trend=0.8860	p-trend=0.2135
ATR	RS13091637	CC	286 (67)	237 (67)	271 (65)
		CT	127 (30)	102 (29)	127 (31)	1.03 (0.76-1.39)	1.10 (0.79-1.51)	0.98 (0.72-1.34)
		TT	12 (3)	16 (5)	17 (4)	1.56 (0.72-3.38)	0.95 (0.46-1.95)	1.62 (0.75-3.50)
						p-trend=0.4402	p-trend=0.7575	p-trend=0.5304
ATR	RS1802904	TT	249 (59)	213 (60)	257 (62)
		CT	149 (35)	125 (35)	136 (33)	0.92 (0.69-1.24)	0.92 (0.68-1.26)	0.97 (0.71-1.30)
		CC	26 (6)	18 (5)	22 (5)	0.83 (0.45-1.51)	1.00 (0.52-1.95)	0.81 (0.43-1.52)
						p-trend=0.4559	p-trend=0.7278	p-trend=0.5721
ATR	RS2229032	CC	342 (80)	291 (82)	324 (78)
		CT	77 (18)	59 (17)	83 (20)	1.20 (0.84-1.70)	1.22 (0.84-1.78)	0.90 (0.62-1.30)
		TT	6 (1)	6 (2)	8 (2)	1.29 (0.44-3.81)	1.06 (0.35-3.19)	1.12 (0.36-3.53)
						p-trend=0.2879	p-trend=0.3631	p-trend=0.7108
ATR	RS4256152	GG	183 (43)	145 (41)	168 (41)
		AG	200 (47)	162 (46)	196 (47)	1.07 (0.80-1.44)	1.07 (0.78-1.46)	1.03 (0.76-1.40)
		AA	41 (10)	49 (14)	50 (12)	1.35 (0.84-2.16)	0.91 (0.57-1.45)	1.54 (0.96-2.47)
						p-trend=0.2506	p-trend=0.8938	p-trend=0.1461
ATR	RS6799752	CC	115 (27)	117 (33)	140 (34)
		CT	215 (51)	166 (47)	193 (47)	0.73 (0.53-1.00)	0.96 (0.69-1.33)	0.75 (0.54-1.04)
		TT	95 (22)	73 (21)	82 (20)	0.69 (0.47-1.03)	0.94 (0.62-1.41)	0.75 (0.50-1.12)
						p-trend=0.0493	p-trend=0.7392	p-trend=0.1236
ATR	RS6805118	CC	390 (92)	338 (95)	389 (94)
		CT	32 (8)	17 (5)	24 (6)	0.72 (0.41-1.26)	1.12 (0.59-2.16)	0.62 (0.34-1.13)
		TT	2 (0)	0 (0)	1 (0)	0.42 (0.04-4.73)	218669 (0.00-I)	0.00 (0.00-I)
						p-trend=0.1818	p-trend=0.5145	p-trend=0.0601
ATR	RS7630115	GG	162 (38)	123 (35)	149 (36)
		AG	199 (47)	165 (46)	192 (46)	1.05 (0.77-1.42)	0.98 (0.71-1.36)	1.11 (0.81-1.51)
		AA	64 (15)	68 (19)	72 (17)	1.22 (0.81-1.85)	0.90 (0.59-1.37)	1.43 (0.94-2.16)
						p-trend=0.3676	p-trend=0.6628	p-trend=0.1106
ATR	RS7632782	GG	389 (92)	321 (90)	382 (92)
		AG	35 (8)	33 (9)	33 (8)	0.93 (0.56-1.54)	0.85 (0.50-1.42)	1.14 (0.69-1.87)
		AA	1 (0)	1 (0)	0 (0)	0.00 (0.00-I)	0.00 (0.00-I)	1.13 (0.07-18.13)
						p-trend=0.6299	p-trend=0.4216	p-trend=0.6129
ATR	RS7636909	AA	163 (38)	124 (35)	148 (36)
		AG	197 (46)	165 (46)	193 (47)	1.08 (0.80-1.46)	1.00 (0.72-1.38)	1.12 (0.82-1.53)
		GG	64 (15)	67 (19)	73 (18)	1.26 (0.84-1.90)	0.94 (0.62-1.43)	1.40 (0.93-2.13)
						p-trend=0.2843	p-trend=0.8092	p-trend=0.1224
ATR	RS9683085	AA	108 (25)	108 (30)	126 (30)
		AG	214 (50)	165 (46)	200 (48)	0.80 (0.57-1.10)	1.07 (0.76-1.50)	0.76 (0.54-1.07)
		GG	103 (24)	83 (23)	89 (21)	0.72 (0.49-1.06)	0.91 (0.61-1.37)	0.80 (0.54-1.19)
						p-trend=0.0914	p-trend=0.7220	p-trend=0.2439
ATR	RS9835086	TT	394 (93)	320 (90)	387 (93)
		AT	30 (7)	35 (10)	27 (7)	0.92 (0.53-1.59)	0.67 (0.39-1.14)	1.42 (0.86-2.37)
		AA	1 (0)	1 (0)	1 (0)	0.94 (0.06-15.48)	0.74 (0.04-12.40)	1.38 (0.09-22.22)
						p-trend=0.7713	p-trend=0.1480	p-trend=0.1771
ATR	RS9856772	GG	389 (92)	325 (91)	390 (94)
		AG	35 (8)	30 (8)	25 (6)	0.77 (0.45-1.32)	0.75 (0.43-1.32)	0.99 (0.59-1.66)
		AA	1 (0)	1 (0)	0 (0)	0.00 (0.00-I)	0.00 (0.00-I)	1.11 (0.07-17.83)
						p-trend=0.2657	p-trend=0.2226	p-trend=0.9995
B3GAT3	RS10897289	TT	210 (49)	194 (54)	202 (49)
		CT	181 (43)	128 (36)	190 (46)	1.10 (0.83-1.47)	1.43 (1.05-1.93)	0.77 (0.57-1.04)
		CC	34 (8)	34 (10)	23 (6)	0.74 (0.42-1.31)	0.76 (0.43-1.37)	1.05 (0.63-1.77)
						p-trend=0.8120	p-trend=0.4359	p-trend=0.4110
B3GAT3	RS11231161	AA	262 (62)	232 (65)	265 (64)
		AG	145 (34)	107 (30)	136 (33)	0.96 (0.71-1.29)	1.13 (0.82-1.55)	0.83 (0.61-1.13)
		GG	18 (4)	17 (5)	13 (3)	0.76 (0.36-1.60)	0.83 (0.39-1.79)	1.03 (0.52-2.05)
						p-trend=0.5343	p-trend=0.7756	p-trend=0.4390
B3GAT3	RS11231168	CC	112 (26)	84 (24)	106 (26)
		CT	228 (54)	175 (49)	222 (53)	1.02 (0.74-1.42)	0.98 (0.69-1.41)	1.03 (0.73-1.45)
		TT	85 (20)	97 (27)	87 (21)	1.05 (0.70-1.57)	0.70 (0.46-1.06)	1.52 (1.02-2.29)
						p-trend=0.8240	p-trend=0.0948	p-trend=0.0448
B3GAT3	RS1801144	GG	264 (62)	240 (67)	267 (64)
		CG	143 (34)	102 (29)	138 (33)	0.99 (0.74-1.33)	1.23 (0.90-1.69)	0.78 (0.57-1.07)
		CC	17 (4)	14 (4)	10 (2)	0.60 (0.27-1.34)	0.76 (0.33-1.78)	0.89 (0.43-1.84)
						p-trend=0.4614	p-trend=0.5118	p-trend=0.1831
B3GAT3	RS2956993	TT	190 (45)	179 (50)	182 (44)
		GT	197 (46)	138 (39)	199 (48)	1.06 (0.80-1.41)	1.41 (1.04-1.92)	0.75 (0.55-1.01)
		GG	38 (9)	39 (11)	34 (8)	0.97 (0.58-1.62)	0.96 (0.57-1.61)	1.07 (0.66-1.76)
						p-trend=0.8870	p-trend=0.2926	p-trend=0.4321
B3GAT3	RS7949030	AA	175 (44)	165 (49)	173 (44)
		AG	178 (45)	132 (40)	191 (49)	1.10 (0.82-1.48)	1.38 (1.00-1.89)	0.79 (0.58-1.08)
		GG	47 (12)	37 (11)	29 (7)	0.66 (0.39-1.11)	0.91 (0.52-1.57)	0.81 (0.50-1.31)
						p-trend=0.4270	p-trend=0.3989	p-trend=0.1813
B3GAT3	RS948683	GG	403 (95)	340 (96)	388 (93)
		CG	22 (5)	16 (4)	25 (6)	1.14 (0.62-2.07)	1.21 (0.63-2.34)	0.89 (0.46-1.72)
		CC	0 (0)	0 (0)	2 (0)	530106 (0.00-I)	439268 (0.00-I)	(-)
						p-trend=0.3601	p-trend=0.3029	p-trend=0.7179
B4GALT7	RS1047577	TT	141 (34)	140 (40)	127 (32)
		CT	205 (49)	157 (44)	202 (50)	1.10 (0.80-1.51)	1.42 (1.02-1.96)	0.77 (0.56-1.06)
		CC	71 (17)	57 (16)	74 (18)	1.14 (0.76-1.73)	1.46 (0.95-2.25)	0.82 (0.54-1.25)
						p-trend=0.4825	p-trend=0.0433	p-trend=0.2091
B4GALT7	RS11249570	GG	216 (51)	189 (53)	209 (50)
		AG	178 (42)	138 (39)	175 (42)	1.01 (0.76-1.35)	1.11 (0.81-1.50)	0.89 (0.66-1.20)
		AA	31 (7)	29 (8)	30 (7)	1.05 (0.61-1.81)	0.92 (0.53-1.62)	1.06 (0.62-1.83)
						p-trend=0.8617	p-trend=0.8473	p-trend=0.7594
B4GALT7	RS12515554	TT	271 (64)	218 (61)	246 (59)
		CT	139 (33)	124 (35)	152 (37)	1.25 (0.93-1.67)	1.04 (0.77-1.41)	1.11 (0.82-1.50)
		CC	15 (4)	14 (4)	17 (4)	1.38 (0.66-2.86)	1.11 (0.52-2.35)	1.16 (0.55-2.45)
						p-trend=0.1140	p-trend=0.7306	p-trend=0.4735
B4GALT7	RS3792849	CC	126 (30)	119 (33)	114 (27)
		CT	204 (48)	167 (47)	207 (50)	1.13 (0.82-1.56)	1.26 (0.90-1.77)	0.87 (0.63-1.20)
		TT	95 (22)	70 (20)	94 (23)	1.10 (0.75-1.62)	1.43 (0.95-2.16)	0.79 (0.53-1.18)
						p-trend=0.5995	p-trend=0.0797	p-trend=0.2312
B4GALT7	RS4976704	TT	325 (76)	281 (79)	308 (74)
		CT	96 (23)	72 (20)	101 (24)	1.15 (0.83-1.59)	1.26 (0.89-1.79)	0.86 (0.61-1.22)
		CC	4 (1)	3 (1)	6 (1)	1.68 (0.46-6.12)	1.81 (0.44-7.48)	0.86 (0.19-3.88)
						p-trend=0.2907	p-trend=0.1355	p-trend=0.4003
B4GALT7	RS6600989	TT	179 (42)	151 (43)	160 (41)
		CT	198 (47)	155 (44)	185 (47)	1.06 (0.79-1.43)	1.10 (0.80-1.51)	0.93 (0.69-1.26)
		CC	45 (11)	49 (14)	49 (12)	1.26 (0.79-2.00)	0.88 (0.55-1.41)	1.30 (0.82-2.06)
						p-trend=0.3661	p-trend=0.8611	p-trend=0.5175
B4GALT7	RS6634	AA	138 (33)	95 (27)	133 (32)
		AT	191 (45)	189 (53)	207 (50)	1.14 (0.83-1.56)	0.76 (0.54-1.07)	1.43 (1.03-1.99)
		TT	95 (22)	72 (20)	74 (18)	0.84 (0.57-1.25)	0.74 (0.48-1.14)	1.08 (0.72-1.61)
						p-trend=0.5438	p-trend=0.1338	p-trend=0.5401
B4GALT7	RS729459	CC	184 (43)	155 (44)	178 (43)
		CT	194 (46)	152 (43)	185 (45)	1.01 (0.76-1.36)	1.03 (0.75-1.40)	0.93 (0.69-1.26)
		TT	47 (11)	49 (14)	52 (13)	1.17 (0.75-1.84)	0.88 (0.56-1.39)	1.25 (0.79-1.97)
						p-trend=0.5749	p-trend=0.7157	p-trend=0.5938
B4GALT7	RS7727897	TT	249 (59)	208 (58)	268 (65)
		CT	152 (36)	125 (35)	128 (31)	0.79 (0.59-1.06)	0.82 (0.60-1.12)	0.97 (0.71-1.31)
		CC	24 (6)	23 (6)	19 (5)	0.70 (0.37-1.32)	0.68 (0.35-1.30)	1.12 (0.61-2.05)
						p-trend=0.0801	p-trend=0.1163	p-trend=0.9292
B4GALT7	RS968406	CC	305 (72)	259 (74)	297 (75)
		CG	107 (25)	82 (23)	90 (23)	0.84 (0.61-1.17)	0.95 (0.67-1.35)	0.91 (0.65-1.27)
		GG	11 (3)	11 (3)	11 (3)	1.03 (0.43-2.45)	0.85 (0.36-2.04)	1.17 (0.50-2.75)
						p-trend=0.4532	p-trend=0.6824	p-trend=0.8237
BAK1	RS11752179	GG	299 (70)	241 (68)	275 (66)
		GT	109 (26)	105 (29)	127 (31)	1.25 (0.92-1.70)	1.04 (0.76-1.43)	1.20 (0.87-1.65)
		TT	17 (4)	10 (3)	13 (3)	0.85 (0.40-1.81)	1.11 (0.47-2.63)	0.74 (0.33-1.64)
						p-trend=0.4165	p-trend=0.7363	p-trend=0.6874
BAK1	RS11757379	GG	337 (79)	292 (82)	338 (81)
		GT	80 (19)	61 (17)	73 (18)	0.89 (0.63-1.28)	0.98 (0.67-1.44)	0.88 (0.61-1.27)
		TT	8 (2)	3 (1)	4 (1)	0.46 (0.13-1.55)	0.98 (0.21-4.52)	0.44 (0.12-1.67)
						p-trend=0.2511	p-trend=0.9318	p-trend=0.2349
BAK1	RS11961332	GG	419 (99)	352 (99)	409 (99)
		CG	6 (1)	4 (1)	6 (1)	1.03 (0.32-3.28)	1.77 (0.48-6.50)	0.80 (0.22-2.86)
		CC	0 ()	0 ()	0 ()	(-)	(-)	(-)
						p-trend=0.9578	p-trend=0.3900	p-trend=0.7289
BAK1	RS12206050	AA	235 (55)	192 (54)	208 (50)
		AT	154 (36)	128 (36)	181 (44)	1.31 (0.98-1.75)	1.24 (0.91-1.69)	1.02 (0.75-1.38)
		TT	36 (8)	36 (10)	25 (6)	0.76 (0.44-1.32)	0.65 (0.37-1.13)	1.24 (0.75-2.04)
						p-trend=0.6406	p-trend=0.8072	p-trend=0.4969
BAK1	RS12214669	GG	341 (80)	282 (79)	331 (80)
		CG	73 (17)	71 (20)	80 (19)	1.10 (0.77-1.57)	0.92 (0.64-1.33)	1.18 (0.82-1.69)
		CC	11 (3)	3 (1)	4 (1)	0.37 (0.11-1.18)	1.07 (0.23-4.92)	0.33 (0.09-1.20)
						p-trend=0.6220	p-trend=0.7132	p-trend=0.8286
BAK1	RS210131	CC	370 (87)	319 (90)	366 (88)
		CT	54 (13)	35 (10)	47 (11)	0.87 (0.57-1.34)	1.23 (0.76-1.97)	0.73 (0.47-1.16)
		TT	1 (0)	2 (1)	2 (0)	2.33 (0.20-26.61)	1.14 (0.15-8.53)	2.17 (0.19-24.10)
						p-trend=0.7220	p-trend=0.4186	p-trend=0.3077
BAK1	RS210132	GG	138 (32)	96 (27)	126 (30)
		GT	198 (47)	195 (55)	198 (48)	1.05 (0.76-1.44)	0.73 (0.52-1.03)	1.43 (1.03-1.98)
		TT	89 (21)	65 (18)	91 (22)	1.08 (0.74-1.59)	1.04 (0.68-1.59)	1.07 (0.70-1.61)
						p-trend=0.6841	p-trend=0.9328	p-trend=0.5246
BAK1	RS210133	GG	159 (38)	149 (42)	178 (43)
		CG	207 (49)	155 (44)	190 (46)	0.84 (0.63-1.13)	1.04 (0.76-1.41)	0.79 (0.58-1.08)
		CC	57 (13)	51 (14)	45 (11)	0.74 (0.47-1.16)	0.79 (0.49-1.26)	0.94 (0.60-1.45)
						p-trend=0.1337	p-trend=0.5037	p-trend=0.4267
BAK1	RS210137	CC	265 (62)	223 (63)	271 (65)
		CT	144 (34)	120 (34)	127 (31)	0.86 (0.64-1.15)	0.87 (0.64-1.20)	1.00 (0.74-1.35)
		TT	16 (4)	13 (4)	16 (4)	0.99 (0.48-2.05)	0.91 (0.42-1.96)	0.98 (0.46-2.08)
						p-trend=0.4448	p-trend=0.4411	p-trend=0.9575
BAK1	RS210138	AA	255 (60)	218 (61)	261 (63)
		AG	152 (36)	123 (35)	136 (33)	0.88 (0.65-1.17)	0.93 (0.68-1.27)	0.95 (0.70-1.28)
		GG	18 (4)	15 (4)	17 (4)	0.92 (0.46-1.85)	0.82 (0.39-1.70)	0.99 (0.49-2.02)
						p-trend=0.4362	p-trend=0.5163	p-trend=0.8003
BAK1	RS210142	CC	242 (59)	204 (59)	237 (59)
		CT	148 (36)	122 (35)	150 (38)	1.01 (0.75-1.36)	1.06 (0.77-1.44)	0.97 (0.71-1.31)
		TT	23 (6)	19 (6)	13 (3)	0.61 (0.30-1.25)	0.66 (0.31-1.39)	0.97 (0.51-1.82)
						p-trend=0.4607	p-trend=0.6961	p-trend=0.8364
BAK1	RS210162	AA	255 (60)	210 (59)	260 (63)
		AG	148 (35)	130 (37)	133 (32)	0.88 (0.65-1.18)	0.82 (0.60-1.12)	1.07 (0.80-1.45)
		GG	22 (5)	16 (4)	21 (5)	0.97 (0.52-1.83)	1.01 (0.51-2.01)	0.88 (0.45-1.72)
						p-trend=0.5105	p-trend=0.3856	p-trend=0.9152
BAK1	RS210163	TT	286 (67)	255 (72)	281 (68)
		CT	124 (29)	91 (26)	123 (30)	1.02 (0.75-1.38)	1.26 (0.91-1.74)	0.82 (0.59-1.12)
		CC	15 (4)	10 (3)	10 (2)	0.63 (0.27-1.44)	0.84 (0.34-2.08)	0.75 (0.33-1.70)
						p-trend=0.6064	p-trend=0.3721	p-trend=0.1808
BAK1	RS375555	TT	266 (63)	220 (62)	272 (66)
		CT	141 (33)	122 (34)	121 (29)	0.83 (0.62-1.12)	0.78 (0.57-1.06)	1.05 (0.78-1.43)
		CC	18 (4)	14 (4)	20 (5)	1.10 (0.57-2.16)	1.10 (0.53-2.26)	0.95 (0.46-1.95)
						p-trend=0.5046	p-trend=0.3326	p-trend=0.8685
BAK1	RS394199	CC	169 (40)	129 (36)	160 (39)
		CT	191 (45)	178 (50)	207 (50)	1.16 (0.87-1.57)	0.93 (0.68-1.27)	1.22 (0.90-1.66)
		TT	64 (15)	49 (14)	48 (12)	0.78 (0.51-1.22)	0.75 (0.47-1.20)	1.01 (0.65-1.56)
						p-trend=0.6434	p-trend=0.2683	p-trend=0.6253
BAK1	RS396746	CC	350 (82)	298 (84)	333 (80)
		AC	73 (17)	55 (15)	76 (18)	1.13 (0.79-1.62)	1.36 (0.92-2.01)	0.87 (0.59-1.28)
		AA	2 (0)	2 (1)	5 (1)	3.04 (0.57-16.25)	2.70 (0.50-14.64)	1.09 (0.15-7.79)
						p-trend=0.2498	p-trend=0.0646	p-trend=0.5278
BAK1	RS419261	CC	257 (60)	220 (62)	234 (57)
		CT	145 (34)	119 (33)	163 (39)	1.26 (0.94-1.68)	1.33 (0.98-1.81)	0.95 (0.70-1.28)
		TT	23 (5)	17 (5)	17 (4)	0.83 (0.43-1.60)	0.92 (0.45-1.88)	0.86 (0.45-1.65)
						p-trend=0.4464	p-trend=0.2377	p-trend=0.6022
BAK1	RS420361	CC	244 (57)	202 (57)	225 (54)
		CT	153 (36)	133 (37)	158 (38)	1.16 (0.87-1.55)	1.15 (0.84-1.56)	1.04 (0.77-1.40)
		TT	28 (7)	21 (6)	32 (8)	1.27 (0.73-2.19)	1.38 (0.76-2.50)	0.90 (0.50-1.64)
						p-trend=0.2392	p-trend=0.2129	p-trend=0.9413
BAK1	RS422907	AA	235 (55)	186 (52)	210 (51)
		AG	158 (37)	145 (41)	170 (41)	1.23 (0.92-1.64)	1.10 (0.81-1.49)	1.15 (0.86-1.55)
		GG	32 (8)	25 (7)	35 (8)	1.28 (0.76-2.16)	1.29 (0.74-2.27)	0.97 (0.56-1.70)
						p-trend=0.1505	p-trend=0.3354	p-trend=0.6100
BAK1	RS480568	GG	378 (93)	315 (91)	359 (91)
		GT	29 (7)	31 (9)	33 (8)	1.25 (0.74-2.11)	0.98 (0.58-1.66)	1.28 (0.75-2.18)
		TT	0 (0)	0 (0)	1 (0)	151717 (0.00-I)	307749 (0.00-I)	(-)
						p-trend=0.3137	p-trend=0.9028	p-trend=0.3584
BAK1	RS485623	GG	406 (96)	330 (93)	384 (93)
		AG	19 (4)	26 (7)	30 (7)	1.68 (0.92-3.07)	1.00 (0.57-1.75)	1.69 (0.92-3.12)
		AA	0 (0)	0 (0)	1 (0)	252484 (0.00-I)	217398 (0.00-I)	(-)
						p-trend=0.0540	p-trend=0.7746	p-trend=0.0909
BAK1	RS493871	AA	159 (37)	144 (40)	163 (39)
		AG	197 (46)	161 (45)	194 (47)	0.98 (0.73-1.32)	1.06 (0.77-1.45)	0.90 (0.66-1.22)
		GG	69 (16)	51 (14)	57 (14)	0.78 (0.51-1.19)	0.97 (0.62-1.52)	0.82 (0.53-1.26)
						p-trend=0.3282	p-trend=0.9923	p-trend=0.3269
BAK1	RS513349	GG	155 (36)	127 (36)	140 (34)
		AG	192 (45)	175 (49)	205 (49)	1.17 (0.86-1.59)	1.05 (0.76-1.45)	1.10 (0.80-1.50)
		AA	78 (18)	54 (15)	70 (17)	1.01 (0.68-1.51)	1.22 (0.78-1.89)	0.83 (0.55-1.27)
						p-trend=0.7560	p-trend=0.4112	p-trend=0.5848
BAK1	RS521671	TT	365 (86)	301 (85)	352 (85)
		CT	59 (14)	55 (15)	60 (14)	1.12 (0.75-1.66)	1.00 (0.67-1.51)	1.13 (0.76-1.68)
		CC	1 (0)	0 (0)	3 (1)	2.59 (0.26-25.33)	1061810 (0.00-I)	0.00 (0.00-I)
						p-trend=0.4145	p-trend=0.6373	p-trend=0.6810
BAK1	RS530878	AA	188 (44)	158 (44)	201 (48)
		AG	197 (46)	158 (44)	170 (41)	0.83 (0.62-1.10)	0.89 (0.66-1.21)	0.95 (0.71-1.28)
		GG	40 (9)	40 (11)	44 (11)	1.04 (0.64-1.68)	0.88 (0.54-1.44)	1.21 (0.74-1.97)
						p-trend=0.5874	p-trend=0.4666	p-trend=0.7024
BAK1	RS557559	TT	403 (95)	328 (92)	378 (92)
		GT	22 (5)	27 (8)	34 (8)	1.68 (0.96-2.94)	1.13 (0.66-1.93)	1.51 (0.85-2.71)
		GG	0 (0)	0 (0)	1 (0)	254585 (0.00-I)	219538 (0.00-I)	(-)
						p-trend=0.0437	p-trend=0.4945	p-trend=0.1629
BAK1	RS563751	AA	188 (44)	158 (44)	200 (49)
		AG	197 (46)	158 (44)	170 (41)	0.83 (0.62-1.11)	0.90 (0.66-1.22)	0.95 (0.71-1.28)
		GG	40 (9)	40 (11)	41 (10)	0.98 (0.60-1.59)	0.83 (0.51-1.36)	1.21 (0.74-1.97)
						p-trend=0.4765	p-trend=0.3758	p-trend=0.7024
BAK1	RS5745568	GG	231 (54)	189 (53)	213 (51)
		GT	156 (37)	137 (38)	172 (41)	1.17 (0.87-1.56)	1.03 (0.76-1.40)	1.08 (0.80-1.46)
		TT	38 (9)	30 (8)	30 (7)	0.85 (0.50-1.42)	0.89 (0.51-1.55)	0.98 (0.58-1.64)
						p-trend=0.8617	p-trend=0.8722	p-trend=0.8311
BAK1	RS5745577	CC	394 (93)	334 (94)	382 (92)
		CT	30 (7)	21 (6)	32 (8)	1.07 (0.63-1.81)	1.48 (0.83-2.66)	0.84 (0.47-1.49)
		TT	1 (0)	1 (0)	0 (0)	0.00 (0.00-I)	0.00 (0.00-I)	1.10 (0.07-17.65)
						p-trend=0.9528	p-trend=0.3074	p-trend=0.5926
BAK1	RS6457736	TT	232 (55)	207 (58)	230 (55)
		CT	167 (39)	120 (34)	162 (39)	0.98 (0.74-1.31)	1.23 (0.90-1.68)	0.81 (0.60-1.09)
		CC	26 (6)	29 (8)	23 (6)	0.90 (0.49-1.65)	0.72 (0.40-1.30)	1.23 (0.70-2.15)
						p-trend=0.7685	p-trend=0.9309	p-trend=0.6955
BAK1	RS6900408	GG	204 (48)	174 (49)	224 (54)
		GT	186 (44)	151 (42)	157 (38)	0.78 (0.58-1.04)	0.85 (0.63-1.16)	0.95 (0.71-1.27)
		TT	35 (8)	31 (9)	32 (8)	0.84 (0.50-1.42)	0.80 (0.46-1.38)	1.05 (0.62-1.78)
						p-trend=0.1524	p-trend=0.2525	p-trend=0.9468
BAK1	RS6903143	TT	413 (97)	344 (97)	401 (97)
		CT	12 (3)	12 (3)	14 (3)	1.23 (0.56-2.73)	1.08 (0.48-2.41)	1.21 (0.53-2.73)
		CC	0 ()	0 ()	0 ()	(-)	(-)	(-)
						p-trend=0.6056	p-trend=0.8572	p-trend=0.6509
BAK1	RS6905720	CC	411 (97)	338 (95)	399 (96)
		CT	14 (3)	18 (5)	16 (4)	1.23 (0.58-2.57)	0.77 (0.38-1.55)	1.58 (0.77-3.22)
		TT	0 ()	0 ()	0 ()	(-)	(-)	(-)
						p-trend=0.5888	p-trend=0.4569	p-trend=0.2126
BAK1	RS6914422	CC	192 (45)	149 (42)	174 (42)
		CT	170 (40)	168 (47)	192 (46)	1.22 (0.91-1.65)	0.95 (0.70-1.29)	1.28 (0.94-1.73)
		TT	63 (15)	39 (11)	49 (12)	0.85 (0.55-1.30)	1.07 (0.66-1.73)	0.80 (0.51-1.26)
						p-trend=0.9615	p-trend=0.9691	p-trend=0.9267
BIRC5	RS1042541	GG	146 (34)	131 (37)	127 (31)
		AG	199 (47)	158 (44)	216 (52)	1.25 (0.91-1.70)	1.46 (1.05-2.02)	0.88 (0.64-1.21)
		AA	80 (19)	67 (19)	71 (17)	0.99 (0.66-1.49)	1.05 (0.68-1.60)	0.93 (0.63-1.40)
						p-trend=0.7725	p-trend=0.4709	p-trend=0.6336
BIRC5	RS1042542	CC	137 (32)	122 (34)	120 (29)
		CT	203 (48)	160 (45)	217 (52)	1.22 (0.89-1.67)	1.43 (1.02-2.00)	0.88 (0.64-1.21)
		TT	85 (20)	74 (21)	77 (19)	1.00 (0.67-1.49)	1.03 (0.68-1.57)	0.98 (0.66-1.45)
						p-trend=0.8143	p-trend=0.6083	p-trend=0.8016
BIRC5	RS11655650	CC	148 (35)	129 (36)	133 (32)
		CT	198 (47)	153 (43)	219 (53)	1.25 (0.92-1.71)	1.48 (1.07-2.06)	0.88 (0.64-1.21)
		TT	79 (19)	74 (21)	62 (15)	0.87 (0.57-1.31)	0.83 (0.54-1.27)	1.08 (0.73-1.60)
						p-trend=0.8494	p-trend=0.9060	p-trend=0.8781
BIRC5	RS11868371	GG	299 (70)	251 (71)	290 (70)
		CG	107 (25)	94 (26)	115 (28)	1.09 (0.80-1.50)	1.07 (0.77-1.49)	1.05 (0.76-1.45)
		CC	19 (4)	11 (3)	10 (2)	0.63 (0.28-1.39)	0.91 (0.37-2.23)	0.67 (0.31-1.44)
						p-trend=0.8005	p-trend=0.8382	p-trend=0.6648
BIRC5	RS11868709	CC	136 (32)	123 (35)	116 (28)
		AC	201 (47)	153 (43)	213 (52)	1.21 (0.88-1.66)	1.53 (1.09-2.15)	0.84 (0.61-1.16)
		AA	88 (21)	80 (22)	84 (20)	1.09 (0.74-1.62)	1.13 (0.75-1.70)	1.01 (0.68-1.49)
						p-trend=0.5552	p-trend=0.3676	p-trend=0.9036
BIRC5	RS16970909	GG	249 (59)	184 (52)	234 (57)
		GT	147 (35)	143 (40)	149 (36)	1.06 (0.79-1.42)	0.83 (0.61-1.13)	1.32 (0.98-1.77)
		TT	29 (7)	29 (8)	30 (7)	1.10 (0.63-1.90)	0.80 (0.46-1.41)	1.35 (0.78-2.34)
						p-trend=0.6456	p-trend=0.2244	p-trend=0.0717
BIRC5	RS2071214	AA	378 (89)	324 (91)	372 (90)
		AG	44 (10)	32 (9)	42 (10)	0.97 (0.61-1.52)	1.06 (0.65-1.75)	0.86 (0.53-1.39)
		GG	3 (1)	0 (0)	1 (0)	0.27 (0.03-2.66)	112051 (0.00-I)	0.00 (0.00-I)
						p-trend=0.5429	p-trend=0.6833	p-trend=0.2509
BIRC5	RS2239680	TT	309 (73)	256 (72)	303 (73)
		CT	109 (26)	94 (26)	104 (25)	1.03 (0.75-1.42)	0.93 (0.67-1.30)	1.03 (0.75-1.42)
		CC	7 (2)	6 (2)	8 (2)	1.04 (0.37-2.96)	0.95 (0.32-2.87)	1.09 (0.36-3.31)
						p-trend=0.8467	p-trend=0.6871	p-trend=0.8172
BIRC5	RS2515815	CC	115 (27)	100 (28)	103 (25)
		CT	206 (48)	168 (47)	218 (53)	1.19 (0.85-1.66)	1.33 (0.93-1.88)	0.93 (0.67-1.31)
		TT	104 (24)	88 (25)	94 (23)	1.00 (0.68-1.48)	1.01 (0.67-1.53)	0.97 (0.65-1.43)
						p-trend=0.9588	p-trend=0.9041	p-trend=0.8579
BIRC5	RS3764383	TT	308 (72)	257 (72)	301 (73)
		CT	110 (26)	92 (26)	109 (26)	1.07 (0.78-1.46)	0.99 (0.71-1.38)	1.00 (0.72-1.38)
		CC	7 (2)	7 (2)	5 (1)	0.63 (0.19-2.04)	0.48 (0.15-1.56)	1.28 (0.44-3.70)
						p-trend=0.9783	p-trend=0.5620	p-trend=0.8486
BIRC5	RS4789555	TT	308 (72)	243 (68)	293 (71)
		CT	109 (26)	100 (28)	111 (27)	1.06 (0.78-1.45)	0.95 (0.68-1.32)	1.17 (0.85-1.61)
		CC	8 (2)	13 (4)	11 (3)	1.40 (0.55-3.58)	0.71 (0.31-1.66)	2.10 (0.86-5.16)
						p-trend=0.5013	p-trend=0.4964	p-trend=0.1025
BIRC5	RS7221585	CC	190 (45)	134 (38)	150 (36)
		CT	175 (41)	164 (46)	213 (52)	1.56 (1.16-2.11)	1.20 (0.87-1.65)	1.33 (0.98-1.81)
		TT	59 (14)	58 (16)	50 (12)	1.07 (0.69-1.66)	0.81 (0.51-1.28)	1.39 (0.91-2.12)
						p-trend=0.1561	p-trend=0.7503	p-trend=0.0613
BIRC5	RS7226253	CC	151 (36)	137 (39)	145 (35)
		CT	200 (48)	151 (43)	213 (52)	1.13 (0.83-1.53)	1.42 (1.03-1.96)	0.83 (0.60-1.13)
		TT	66 (16)	63 (18)	52 (13)	0.81 (0.53-1.26)	0.78 (0.50-1.23)	1.06 (0.70-1.61)
						p-trend=0.6315	p-trend=0.8910	p-trend=0.9058
BIRC5	RS744120	CC	204 (48)	156 (44)	180 (44)
		CG	165 (39)	150 (42)	195 (48)	1.38 (1.03-1.86)	1.21 (0.88-1.65)	1.18 (0.87-1.59)
		GG	52 (12)	49 (14)	30 (7)	0.63 (0.38-1.04)	0.54 (0.32-0.91)	1.24 (0.80-1.94)
						p-trend=0.8441	p-trend=0.2672	p-trend=0.2340
BIRC5	RS8072874	GG	412 (97)	340 (96)	397 (96)
		AG	12 (3)	16 (4)	16 (4)	1.36 (0.63-2.94)	0.94 (0.45-1.93)	1.59 (0.74-3.42)
		AA	1 (0)	0 (0)	2 (0)	2.02 (0.17-23.46)	554471 (0.00-I)	0.00 (0.00-I)
						p-trend=0.3357	p-trend=0.6390	p-trend=0.4123
BIRC5	RS8082142	CC	194 (46)	142 (40)	158 (38)
		CT	175 (41)	157 (44)	209 (51)	1.46 (1.09-1.97)	1.18 (0.86-1.62)	1.23 (0.91-1.67)
		TT	53 (13)	55 (16)	45 (11)	1.08 (0.68-1.70)	0.80 (0.50-1.27)	1.40 (0.91-2.17)
						p-trend=0.1702	p-trend=0.7458	p-trend=0.0841
BIRC5	RS9907137	CC	238 (56)	181 (51)	218 (53)
		CT	158 (37)	145 (41)	181 (44)	1.24 (0.93-1.64)	1.02 (0.75-1.37)	1.21 (0.90-1.63)
		TT	29 (7)	30 (8)	16 (4)	0.63 (0.33-1.21)	0.42 (0.22-0.81)	1.37 (0.79-2.37)
						p-trend=0.8624	p-trend=0.1158	p-trend=0.1299
BLM	RS12441424	GG	222 (52)	190 (53)	217 (53)
		AG	173 (41)	137 (38)	164 (40)	0.97 (0.72-1.29)	1.03 (0.75-1.39)	0.93 (0.69-1.25)
		AA	29 (7)	29 (8)	30 (7)	1.06 (0.61-1.84)	0.89 (0.51-1.55)	1.18 (0.68-2.04)
						p-trend=0.9934	p-trend=0.8477	p-trend=0.9202
BLM	RS12592875	CC	112 (26)	104 (29)	124 (30)
		CT	216 (51)	178 (50)	202 (49)	0.85 (0.61-1.18)	0.96 (0.69-1.35)	0.88 (0.63-1.23)
		TT	96 (23)	74 (21)	88 (21)	0.83 (0.56-1.23)	0.99 (0.65-1.49)	0.83 (0.55-1.24)
						p-trend=0.3357	p-trend=0.9289	p-trend=0.3530
BLM	RS12909306	TT	366 (86)	317 (89)	357 (86)
		CT	57 (13)	38 (11)	55 (13)	0.97 (0.64-1.45)	1.31 (0.83-2.05)	0.77 (0.50-1.19)
		CC	2 (0)	1 (0)	3 (1)	1.57 (0.25-9.86)	2.78 (0.27-28.09)	0.57 (0.05-6.33)
						p-trend=0.9726	p-trend=0.1583	p-trend=0.2110
BLM	RS16944739	CC	273 (64)	235 (66)	262 (63)
		CT	136 (32)	102 (29)	135 (33)	1.04 (0.77-1.40)	1.12 (0.81-1.54)	0.88 (0.64-1.20)
		TT	16 (4)	19 (5)	18 (4)	1.09 (0.54-2.22)	0.87 (0.44-1.72)	1.39 (0.70-2.76)
						p-trend=0.7401	p-trend=0.8252	p-trend=0.9876
BLM	RS16944775	GG	376 (88)	315 (88)	362 (87)
		AG	47 (11)	41 (12)	50 (12)	1.10 (0.72-1.69)	1.07 (0.68-1.68)	1.05 (0.67-1.64)
		AA	2 (0)	0 (0)	3 (1)	1.91 (0.30-11.98)	1287352 (0.00-I)	0.00 (0.00-I)
						p-trend=0.4987	p-trend=0.4077	p-trend=0.8531
BLM	RS16944798	AA	362 (85)	313 (88)	352 (85)
		AG	60 (14)	42 (12)	59 (14)	1.00 (0.67-1.48)	1.27 (0.83-1.97)	0.81 (0.53-1.24)
		GG	3 (1)	1 (0)	4 (1)	1.54 (0.33-7.15)	2.98 (0.32-28.07)	0.37 (0.04-3.60)
						p-trend=0.8097	p-trend=0.1646	p-trend=0.2243
BLM	RS16944840	AA	355 (84)	311 (87)	349 (84)
		AC	66 (16)	43 (12)	62 (15)	0.94 (0.64-1.39)	1.28 (0.84-1.97)	0.75 (0.49-1.13)
		CC	3 (1)	2 (1)	4 (1)	1.53 (0.33-7.08)	1.69 (0.29-9.79)	0.73 (0.12-4.39)
						p-trend=0.9761	p-trend=0.2061	p-trend=0.1617
BLM	RS16944863	AA	290 (68)	275 (77)	305 (74)
		AG	119 (28)	75 (21)	98 (24)	0.77 (0.56-1.06)	1.22 (0.86-1.73)	0.66 (0.47-0.92)
		GG	15 (4)	6 (2)	11 (3)	0.74 (0.33-1.65)	1.35 (0.48-3.75)	0.42 (0.16-1.09)
						p-trend=0.0984	p-trend=0.2305	p-trend=0.0036
BLM	RS17183763	GG	346 (81)	275 (77)	332 (80)
		CG	76 (18)	76 (21)	76 (18)	1.08 (0.76-1.55)	0.84 (0.58-1.21)	1.25 (0.88-1.79)
		CC	3 (1)	5 (1)	6 (1)	1.99 (0.49-8.15)	0.82 (0.24-2.81)	2.12 (0.50-8.97)
						p-trend=0.4221	p-trend=0.3416	p-trend=0.1266
BLM	RS2270131	GG	346 (81)	278 (78)	334 (81)
		AG	76 (18)	73 (21)	74 (18)	1.03 (0.72-1.48)	0.86 (0.60-1.25)	1.19 (0.83-1.71)
		AA	3 (1)	5 (1)	6 (1)	1.97 (0.48-8.08)	0.83 (0.24-2.83)	2.10 (0.50-8.87)
						p-trend=0.5633	p-trend=0.4173	p-trend=0.1998
BLM	RS2270132	CC	128 (30)	105 (29)	140 (34)
		AC	213 (50)	183 (51)	205 (50)	0.88 (0.65-1.20)	0.84 (0.61-1.17)	1.04 (0.75-1.44)
		AA	84 (20)	68 (19)	68 (16)	0.76 (0.50-1.13)	0.74 (0.48-1.15)	0.99 (0.65-1.49)
						p-trend=0.1738	p-trend=0.1616	p-trend=0.9845
BLM	RS2518967	TT	137 (32)	110 (31)	128 (31)
		CT	217 (51)	188 (53)	202 (49)	1.00 (0.73-1.37)	0.94 (0.67-1.31)	1.07 (0.78-1.47)
		CC	71 (17)	58 (16)	85 (20)	1.27 (0.85-1.90)	1.22 (0.80-1.88)	1.03 (0.67-1.58)
						p-trend=0.3077	p-trend=0.4629	p-trend=0.8323
BLM	RS2518968	CC	154 (36)	140 (39)	157 (38)
		CG	207 (49)	159 (45)	201 (49)	0.93 (0.69-1.25)	1.14 (0.83-1.56)	0.84 (0.62-1.15)
		GG	64 (15)	57 (16)	55 (13)	0.85 (0.55-1.30)	0.84 (0.54-1.32)	0.98 (0.64-1.50)
						p-trend=0.4377	p-trend=0.7512	p-trend=0.6638
BLM	RS2532105	GG	361 (85)	304 (85)	368 (89)
		AG	64 (15)	50 (14)	43 (10)	0.68 (0.44-1.03)	0.76 (0.49-1.18)	0.92 (0.62-1.37)
		AA	0 (0)	2 (1)	4 (1)	1356867 (0.00-I)	1.59 (0.27-9.20)	659569 (0.00-I)
						p-trend=0.3109	p-trend=0.4009	p-trend=0.9951
BLM	RS3784782	CC	364 (86)	290 (81)	343 (83)
		CG	60 (14)	61 (17)	68 (16)	1.25 (0.85-1.84)	0.98 (0.67-1.45)	1.26 (0.86-1.86)
		GG	1 (0)	5 (1)	3 (1)	3.34 (0.34-33.17)	0.40 (0.09-1.71)	6.70 (0.78-57.88)
						p-trend=0.1505	p-trend=0.5183	p-trend=0.0634
BLM	RS389480	AA	189 (45)	143 (40)	190 (46)
		AG	182 (43)	163 (46)	179 (43)	0.98 (0.73-1.31)	0.83 (0.61-1.14)	1.17 (0.87-1.59)
		GG	52 (12)	50 (14)	44 (11)	0.86 (0.55-1.36)	0.66 (0.41-1.05)	1.28 (0.82-1.99)
						p-trend=0.5842	p-trend=0.0646	p-trend=0.2066
BLM	RS414634	CC	284 (67)	241 (68)	294 (71)
		AC	128 (30)	107 (30)	105 (25)	0.80 (0.58-1.08)	0.80 (0.58-1.11)	0.99 (0.73-1.35)
		AA	13 (3)	8 (2)	16 (4)	1.24 (0.58-2.65)	1.79 (0.74-4.32)	0.71 (0.29-1.75)
						p-trend=0.4416	p-trend=0.7612	p-trend=0.6770
BLM	RS439188	CC	115 (27)	83 (23)	88 (21)
		CT	209 (49)	169 (47)	206 (50)	1.28 (0.91-1.81)	1.15 (0.79-1.66)	1.13 (0.79-1.59)
		TT	101 (24)	104 (29)	121 (29)	1.54 (1.04-2.27)	1.13 (0.75-1.70)	1.44 (0.97-2.13)
						p-trend=0.0299	p-trend=0.5895	p-trend=0.0693
BLM	RS441399	AA	157 (37)	160 (45)	187 (45)
		AG	202 (48)	158 (44)	177 (43)	0.75 (0.56-1.01)	0.94 (0.69-1.28)	0.76 (0.56-1.04)
		GG	66 (16)	38 (11)	51 (12)	0.65 (0.42-1.00)	1.13 (0.70-1.83)	0.56 (0.36-0.89)
						p-trend=0.0212	p-trend=0.8477	p-trend=0.0084
BLM	RS4932363	GG	411 (97)	334 (94)	390 (94)
		AG	14 (3)	22 (6)	25 (6)	1.99 (1.01-3.91)	1.06 (0.58-1.95)	1.91 (0.96-3.79)
		AA	0 ()	0 ()	0 ()	(-)	(-)	(-)
						p-trend=0.0477	p-trend=0.8483	p-trend=0.0652
BLM	RS7163604	AA	244 (57)	213 (60)	225 (54)
		AG	153 (36)	121 (34)	163 (39)	1.10 (0.82-1.47)	1.19 (0.88-1.62)	0.92 (0.68-1.24)
		GG	28 (7)	22 (6)	25 (6)	0.96 (0.54-1.72)	1.08 (0.58-2.00)	0.91 (0.51-1.65)
						p-trend=0.7405	p-trend=0.3823	p-trend=0.5880
BLM	RS7170919	CC	244 (57)	196 (55)	234 (56)
		CT	151 (36)	138 (39)	161 (39)	1.12 (0.84-1.50)	1.00 (0.74-1.35)	1.13 (0.84-1.53)
		TT	30 (7)	22 (6)	20 (5)	0.69 (0.38-1.27)	0.70 (0.37-1.35)	0.92 (0.51-1.64)
						p-trend=0.8009	p-trend=0.5094	p-trend=0.7446
BLM	RS7175811	GG	195 (46)	166 (47)	199 (48)
		AG	185 (44)	153 (43)	176 (42)	0.93 (0.70-1.24)	0.97 (0.71-1.32)	0.97 (0.72-1.31)
		AA	45 (11)	37 (10)	40 (10)	0.87 (0.54-1.40)	0.87 (0.52-1.44)	0.95 (0.59-1.54)
						p-trend=0.5065	p-trend=0.6159	p-trend=0.8073
BLM	RS7183841	TT	299 (70)	255 (72)	289 (70)
		CT	122 (29)	89 (25)	119 (29)	1.05 (0.77-1.42)	1.21 (0.87-1.68)	0.85 (0.62-1.17)
		CC	4 (1)	12 (3)	7 (2)	1.94 (0.55-6.82)	0.52 (0.20-1.37)	3.51 (1.12-11.02)
						p-trend=0.5034	p-trend=0.8370	p-trend=0.7730
BLM	RS7184015	GG	221 (52)	183 (51)	208 (50)
		GT	165 (39)	141 (40)	174 (42)	1.06 (0.80-1.42)	1.03 (0.76-1.40)	1.05 (0.78-1.42)
		TT	39 (9)	32 (9)	33 (8)	0.91 (0.55-1.51)	0.93 (0.54-1.59)	0.99 (0.60-1.65)
						p-trend=0.9806	p-trend=0.9399	p-trend=0.8759
BLM	RS8033093	AA	352 (83)	294 (83)	358 (86)
		AT	70 (16)	59 (17)	56 (13)	0.78 (0.53-1.15)	0.76 (0.51-1.14)	1.01 (0.69-1.47)
		TT	3 (1)	3 (1)	1 (0)	0.28 (0.03-2.77)	0.26 (0.03-2.57)	1.31 (0.26-6.58)
						p-trend=0.1209	p-trend=0.0994	p-trend=0.8664
BLM	RS8034371	TT	282 (67)	211 (59)	255 (61)
		AT	129 (30)	131 (37)	148 (36)	1.32 (0.98-1.77)	0.94 (0.69-1.27)	1.35 (0.99-1.82)
		AA	13 (3)	14 (4)	12 (3)	1.03 (0.45-2.34)	0.70 (0.31-1.58)	1.46 (0.67-3.17)
						p-trend=0.1380	p-trend=0.4405	p-trend=0.0462
BLM	RS8037430	CC	258 (61)	205 (58)	255 (62)
		CT	148 (35)	134 (38)	140 (34)	0.97 (0.72-1.30)	0.86 (0.63-1.16)	1.14 (0.85-1.53)
		TT	19 (4)	17 (5)	18 (4)	0.95 (0.48-1.88)	0.81 (0.40-1.65)	1.10 (0.56-2.17)
						p-trend=0.8051	p-trend=0.2921	p-trend=0.4379
BLM	RS8041787	CC	235 (55)	208 (59)	245 (59)
		CT	159 (37)	125 (35)	151 (36)	0.92 (0.69-1.23)	1.02 (0.75-1.38)	0.88 (0.65-1.19)
		TT	31 (7)	22 (6)	18 (4)	0.58 (0.31-1.07)	0.67 (0.34-1.30)	0.79 (0.44-1.40)
						p-trend=0.1353	p-trend=0.5103	p-trend=0.2982
BRCA1	RS13342026	AA	413 (97)	343 (96)	404 (97)
		AT	12 (3)	13 (4)	11 (3)	0.89 (0.38-2.05)	0.78 (0.34-1.80)	1.31 (0.59-2.91)
		TT	0 ()	0 ()	0 ()	(-)	(-)	(-)
						p-trend=0.7775	p-trend=0.5615	p-trend=0.5105
BRCA1	RS2070833	GG	336 (80)	295 (84)	347 (84)
		GT	80 (19)	51 (14)	62 (15)	0.74 (0.51-1.07)	1.04 (0.69-1.57)	0.73 (0.49-1.07)
		TT	3 (1)	7 (2)	5 (1)	1.74 (0.41-7.47)	0.56 (0.17-1.80)	2.78 (0.71-10.88)
						p-trend=0.2761	p-trend=0.7012	p-trend=0.5118
BRCA1	RS3737559	CC	393 (92)	347 (97)	390 (94)
		CT	32 (8)	9 (3)	24 (6)	0.77 (0.44-1.34)	2.71 (1.22-6.03)	0.32 (0.15-0.68)
		TT	0 (0)	0 (0)	1 (0)	145170 (0.00-I)	114852 (0.00-I)	(-)
						p-trend=0.5010	p-trend=0.0112	p-trend=0.0030
BRCA1	RS4986850	CC	401 (94)	337 (95)	388 (93)
		CT	24 (6)	19 (5)	26 (6)	1.14 (0.64-2.04)	1.09 (0.58-2.04)	0.95 (0.51-1.77)
		TT	0 (0)	0 (0)	1 (0)	148869 (0.00-I)	112005 (0.00-I)	(-)
						p-trend=0.5109	p-trend=0.6436	p-trend=0.8743
BRCA1	RS799906	TT	175 (41)	149 (42)	156 (38)
		CT	188 (44)	157 (44)	197 (48)	1.16 (0.86-1.56)	1.21 (0.88-1.65)	0.99 (0.73-1.34)
		CC	62 (15)	49 (14)	60 (15)	1.12 (0.73-1.71)	1.22 (0.78-1.91)	0.92 (0.60-1.42)
						p-trend=0.4421	p-trend=0.2649	p-trend=0.7384
BRCA1	RS799923	GG	361 (85)	305 (86)	337 (81)
		AG	61 (14)	48 (13)	74 (18)	1.34 (0.92-1.95)	1.41 (0.94-2.12)	0.94 (0.62-1.41)
		AA	3 (1)	3 (1)	4 (1)	1.38 (0.30-6.31)	1.21 (0.26-5.62)	1.18 (0.24-5.92)
						p-trend=0.1283	p-trend=0.1157	p-trend=0.8502
BRCA1	RS8065872	AA	416 (98)	334 (94)	404 (98)
		AT	9 (2)	22 (6)	10 (2)	0.96 (0.38-2.42)	0.36 (0.17-0.79)	3.05 (1.39-6.72)
		TT	0 ()	0 ()	0 ()	(-)	(-)	(-)
						p-trend=0.9361	p-trend=0.0109	p-trend=0.0056
BRCA1	RS8067269	GG	139 (33)	111 (31)	135 (33)
		AG	203 (48)	176 (49)	196 (48)	0.96 (0.70-1.31)	0.93 (0.66-1.29)	1.09 (0.79-1.50)
		AA	80 (19)	69 (19)	80 (19)	1.02 (0.68-1.51)	1.00 (0.66-1.51)	1.08 (0.71-1.62)
						p-trend=0.9920	p-trend=0.9165	p-trend=0.6805
BRCA1	RS8176091	CC	206 (48)	189 (53)	206 (50)
		CT	181 (43)	143 (40)	166 (40)	0.91 (0.68-1.22)	1.06 (0.78-1.44)	0.86 (0.64-1.16)
		TT	38 (9)	23 (6)	43 (10)	1.20 (0.74-1.95)	1.76 (1.01-3.08)	0.66 (0.38-1.15)
						p-trend=0.8430	p-trend=0.1065	p-trend=0.1148
BRCA1	RS8176092	TT	201 (48)	185 (52)	197 (48)
		GT	182 (43)	141 (40)	172 (42)	0.97 (0.72-1.29)	1.14 (0.84-1.56)	0.84 (0.63-1.14)
		GG	40 (9)	30 (8)	44 (11)	1.18 (0.73-1.91)	1.44 (0.86-2.41)	0.81 (0.48-1.35)
						p-trend=0.7045	p-trend=0.1478	p-trend=0.2399
BRCA1	RS8176194	AA	206 (48)	189 (53)	208 (50)
		AC	180 (42)	142 (40)	164 (40)	0.90 (0.67-1.20)	1.05 (0.77-1.42)	0.86 (0.64-1.16)
		CC	39 (9)	25 (7)	43 (10)	1.15 (0.71-1.87)	1.61 (0.93-2.77)	0.70 (0.41-1.20)
						p-trend=0.9744	p-trend=0.1703	p-trend=0.1425
BRCA1	RS8176199	TT	228 (54)	206 (59)	231 (56)
		GT	168 (40)	130 (37)	153 (37)	0.90 (0.68-1.21)	1.09 (0.80-1.48)	0.86 (0.64-1.15)
		GG	29 (7)	16 (5)	27 (7)	0.97 (0.55-1.70)	1.54 (0.80-2.98)	0.61 (0.32-1.16)
						p-trend=0.6151	p-trend=0.2462	p-trend=0.1026
BRCA1	RS8176303	TT	425 ()	356 ()	415 ()
		CT	0 ()	0 ()	0 ()	(-)	(-)	(-)
		CC	0 ()	0 ()	0 ()	(-)	(-)	(-)
						p-trend=	p-trend=	p-trend=
BRCA1	RS8176307	AA	423 (100)	352 (99)	410 (99)
		AG	2 (0)	4 (1)	5 (1)	3.18 (0.60-16.83)	1.19 (0.31-4.57)	2.30 (0.42-12.64)
		GG	0 ()	0 ()	0 ()	(-)	(-)	(-)
						p-trend=0.1744	p-trend=0.8044	p-trend=0.3396
BRCA1	RS9903725	CC	396 (93)	320 (90)	373 (90)
		CT	28 (7)	34 (10)	42 (10)	1.54 (0.93-2.56)	1.09 (0.67-1.78)	1.49 (0.88-2.50)
		TT	1 (0)	2 (1)	0 (0)	0.00 (0.00-I)	0.00 (0.00-I)	2.45 (0.22-27.18)
						p-trend=0.1436	p-trend=0.8472	p-trend=0.1004
BRCA2	RS1012130	TT	219 (52)	174 (49)	216 (52)
		CT	167 (39)	157 (44)	169 (41)	1.02 (0.76-1.36)	0.88 (0.65-1.19)	1.17 (0.87-1.58)
		CC	39 (9)	25 (7)	29 (7)	0.73 (0.43-1.23)	0.89 (0.50-1.59)	0.81 (0.47-1.39)
						p-trend=0.4444	p-trend=0.4422	p-trend=0.9319
BRCA2	RS1148321	AA	210 (50)	171 (48)	213 (51)
		AT	177 (42)	158 (44)	162 (39)	1.00 (0.74-1.34)	0.88 (0.65-1.19)	1.08 (0.81-1.46)
		TT	37 (9)	27 (8)	39 (9)	1.06 (0.65-1.74)	1.15 (0.67-1.98)	0.90 (0.53-1.54)
						p-trend=0.8804	p-trend=0.9094	p-trend=0.9586
BRCA2	RS11571596	CC	424 (100)	356 (100)	413 (100)
		CT	1 (0)	0 (0)	2 (0)	1.48 (0.13-16.44)	303805 (0.00-I)	0.00 (0.00-I)
		TT	0 ()	0 ()	0 ()	(-)	(-)	(-)
						p-trend=0.7503	p-trend=0.9807	p-trend=0.9788
BRCA2	RS11571686	AA	389 (92)	324 (91)	384 (93)
		AC	33 (8)	31 (9)	28 (7)	0.86 (0.50-1.46)	0.69 (0.40-1.19)	1.12 (0.67-1.87)
		CC	2 (0)	1 (0)	1 (0)	0.56 (0.05-6.40)	1.56 (0.10-25.43)	0.59 (0.05-6.57)
						p-trend=0.4772	p-trend=0.2497	p-trend=0.8260
BRCA2	RS11571742	GG	248 (58)	214 (60)	241 (58)
		AG	152 (36)	127 (36)	156 (38)	1.06 (0.79-1.41)	1.10 (0.81-1.50)	0.96 (0.71-1.30)
		AA	25 (6)	15 (4)	17 (4)	0.68 (0.36-1.31)	0.94 (0.45-1.96)	0.70 (0.36-1.36)
						p-trend=0.6635	p-trend=0.7067	p-trend=0.4022
BRCA2	RS11571789	CC	391 (92)	325 (91)	386 (93)
		AC	33 (8)	31 (9)	28 (7)	0.85 (0.50-1.44)	0.70 (0.40-1.21)	1.12 (0.67-1.87)
		AA	0 ()	0 ()	0 ()	(-)	(-)	(-)
						p-trend=0.5462	p-trend=0.1975	p-trend=0.6638
BRCA2	RS11571805	AA	395 (93)	333 (94)	393 (95)
		AG	29 (7)	23 (6)	22 (5)	0.71 (0.40-1.27)	0.77 (0.41-1.43)	0.96 (0.54-1.69)
		GG	1 (0)	0 ()	0 (0)	0.00 (0.00-I)	(-)	0.00 (0.00-I)
						p-trend=0.1770	p-trend=0.4071	p-trend=0.6942
BRCA2	RS11571836	AA	307 (72)	269 (76)	307 (75)
		AG	107 (25)	75 (21)	98 (24)	0.89 (0.65-1.23)	1.12 (0.79-1.59)	0.81 (0.58-1.13)
		GG	11 (3)	11 (3)	7 (2)	0.63 (0.24-1.66)	0.63 (0.24-1.68)	1.13 (0.48-2.66)
						p-trend=0.2858	p-trend=0.9971	p-trend=0.4295
BRCA2	RS11839855	AA	411 (100)	345 (99)	357 (98)
		AG	2 (0)	3 (1)	6 (2)	4.44 (0.88-22.41)	2.65 (0.64-10.98)	1.73 (0.29-10.44)
		GG	0 ()	0 ()	0 ()	(-)	(-)	(-)
						p-trend=0.0714	p-trend=0.1805	p-trend=0.5494
BRCA2	RS1207952	CC	142 (33)	108 (30)	124 (30)
		AC	195 (46)	171 (48)	207 (50)	1.26 (0.92-1.73)	1.08 (0.77-1.51)	1.14 (0.82-1.57)
		AA	88 (21)	77 (22)	84 (20)	1.10 (0.74-1.62)	0.98 (0.65-1.48)	1.14 (0.76-1.69)
						p-trend=0.5076	p-trend=0.9720	p-trend=0.4835
BRCA2	RS144848	AA	205 (48)	172 (48)	207 (50)
		AC	182 (43)	152 (43)	162 (39)	0.91 (0.68-1.21)	0.92 (0.68-1.25)	0.99 (0.73-1.33)
		CC	38 (9)	32 (9)	44 (11)	1.21 (0.75-1.96)	1.14 (0.68-1.90)	1.02 (0.61-1.70)
						p-trend=0.8304	p-trend=0.9346	p-trend=0.9989
BRCA2	RS17077401	GG	417 (98)	348 (98)	405 (98)
		CG	8 (2)	8 (2)	10 (2)	1.18 (0.46-3.06)	1.08 (0.41-2.81)	1.23 (0.46-3.33)
		CC	0 ()	0 ()	0 ()	(-)	(-)	(-)
						p-trend=0.7273	p-trend=0.8822	p-trend=0.6797
BRCA2	RS17077541	CC	416 (98)	347 (97)	406 (98)
		CT	8 (2)	9 (3)	9 (2)	1.14 (0.43-3.04)	0.83 (0.32-2.17)	1.36 (0.52-3.58)
		TT	0 ()	0 ()	0 ()	(-)	(-)	(-)
						p-trend=0.7895	p-trend=0.7091	p-trend=0.5282
BRCA2	RS17692629	AA	302 (71)	257 (72)	300 (72)
		AG	114 (27)	87 (25)	113 (27)	0.98 (0.72-1.33)	1.11 (0.80-1.55)	0.91 (0.66-1.26)
		GG	7 (2)	11 (3)	2 (0)	0.25 (0.05-1.21)	0.17 (0.04-0.78)	1.87 (0.71-4.91)
						p-trend=0.4065	p-trend=0.5234	p-trend=0.8388
BRCA2	RS1799943	GG	297 (70)	259 (73)	298 (72)
		AG	114 (27)	87 (24)	108 (26)	0.93 (0.68-1.27)	1.04 (0.75-1.46)	0.89 (0.64-1.23)
		AA	14 (3)	10 (3)	9 (2)	0.66 (0.28-1.56)	0.94 (0.37-2.41)	0.81 (0.35-1.85)
						p-trend=0.3819	p-trend=0.8915	p-trend=0.4078
BRCA2	RS1799944	AA	315 (74)	270 (76)	314 (76)
		AG	101 (24)	82 (23)	94 (23)	0.90 (0.65-1.25)	0.96 (0.68-1.36)	0.95 (0.68-1.32)
		GG	9 (2)	4 (1)	6 (1)	0.64 (0.22-1.84)	1.18 (0.32-4.36)	0.52 (0.16-1.71)
						p-trend=0.3630	p-trend=0.9349	p-trend=0.4257
BRCA2	RS1801426	AA	380 (89)	304 (85)	369 (89)
		AG	44 (10)	49 (14)	43 (10)	0.99 (0.63-1.55)	0.72 (0.46-1.13)	1.40 (0.90-2.16)
		GG	1 (0)	3 (1)	2 (0)	1.77 (0.16-19.89)	0.56 (0.09-3.49)	3.83 (0.40-37.07)
						p-trend=0.9136	p-trend=0.1228	p-trend=0.0650
BRCA2	RS2013080	GG	262 (62)	222 (62)	236 (57)
		AG	134 (32)	119 (33)	153 (37)	1.27 (0.94-1.70)	1.25 (0.92-1.71)	1.05 (0.77-1.42)
		AA	28 (7)	15 (4)	24 (6)	0.95 (0.53-1.70)	1.46 (0.74-2.90)	0.62 (0.32-1.19)
						p-trend=0.3653	p-trend=0.0962	p-trend=0.4578
BRCA2	RS2022	CC	262 (62)	222 (62)	246 (59)
		CT	140 (33)	111 (31)	149 (36)	1.17 (0.87-1.57)	1.27 (0.93-1.73)	0.93 (0.68-1.26)
		TT	23 (5)	23 (6)	20 (5)	0.90 (0.48-1.69)	0.72 (0.38-1.36)	1.19 (0.65-2.19)
						p-trend=0.5995	p-trend=0.7358	p-trend=0.9499
BRCA2	RS206070	GG	371 (87)	319 (90)	359 (87)
		AG	53 (12)	37 (10)	52 (13)	0.99 (0.65-1.49)	1.20 (0.76-1.89)	0.82 (0.52-1.27)
		AA	1 (0)	0 (0)	3 (1)	3.62 (0.37-35.64)	1572775 (0.00-I)	0.00 (0.00-I)
						p-trend=0.7122	p-trend=0.1845	p-trend=0.2839
BRCA2	RS206079	GG	134 (32)	102 (29)	136 (33)
		AG	206 (49)	178 (51)	182 (45)	0.90 (0.66-1.23)	0.78 (0.56-1.10)	1.15 (0.83-1.59)
		AA	80 (19)	70 (20)	88 (22)	1.10 (0.74-1.63)	0.95 (0.63-1.44)	1.16 (0.77-1.75)
						p-trend=0.7565	p-trend=0.6494	p-trend=0.4363
BRCA2	RS206080	CC	416 (98)	349 (98)	405 (98)
		CT	9 (2)	7 (2)	10 (2)	1.02 (0.41-2.57)	1.16 (0.42-3.15)	0.94 (0.34-2.55)
		TT	0 ()	0 ()	0 ()	(-)	(-)	(-)
						p-trend=0.9609	p-trend=0.7770	p-trend=0.9006
BRCA2	RS206099	GG	323 (76)	250 (70)	300 (73)
		AG	92 (22)	97 (27)	101 (24)	1.19 (0.86-1.65)	0.85 (0.61-1.19)	1.37 (0.98-1.90)
		AA	10 (2)	8 (2)	12 (3)	1.11 (0.47-2.62)	1.27 (0.50-3.22)	1.07 (0.42-2.76)
						p-trend=0.3464	p-trend=0.6412	p-trend=0.1167
BRCA2	RS206109	CC	148 (35)	109 (31)	145 (35)
		CG	193 (45)	172 (48)	205 (50)	1.09 (0.80-1.49)	0.90 (0.64-1.24)	1.23 (0.89-1.70)
		GG	84 (20)	75 (21)	63 (15)	0.77 (0.52-1.16)	0.62 (0.40-0.95)	1.23 (0.82-1.83)
						p-trend=0.3553	p-trend=0.0383	p-trend=0.2608
BRCA2	RS206117	CC	175 (41)	161 (45)	170 (41)
		CT	195 (46)	157 (44)	184 (45)	0.96 (0.72-1.30)	1.13 (0.83-1.54)	0.87 (0.64-1.17)
		TT	54 (13)	38 (11)	58 (14)	1.09 (0.71-1.68)	1.47 (0.92-2.36)	0.76 (0.48-1.21)
						p-trend=0.8399	p-trend=0.1163	p-trend=0.1987
BRCA2	RS206118	AA	328 (77)	264 (74)	318 (77)
		AG	91 (21)	84 (24)	92 (22)	1.01 (0.72-1.41)	0.89 (0.63-1.26)	1.14 (0.82-1.60)
		GG	6 (1)	8 (2)	4 (1)	0.61 (0.17-2.23)	0.42 (0.12-1.44)	1.70 (0.58-4.98)
						p-trend=0.7904	p-trend=0.2268	p-trend=0.2574
BRCA2	RS206119	AA	223 (52)	189 (53)	207 (50)
		AG	165 (39)	131 (37)	171 (41)	1.15 (0.86-1.53)	1.24 (0.91-1.70)	0.93 (0.69-1.25)
		GG	37 (9)	36 (10)	37 (9)	1.06 (0.64-1.75)	0.92 (0.55-1.53)	1.15 (0.70-1.90)
						p-trend=0.4991	p-trend=0.6164	p-trend=0.8902
BRCA2	RS206120	AA	329 (77)	267 (75)	312 (75)
		AG	90 (21)	84 (24)	95 (23)	1.09 (0.78-1.52)	0.95 (0.67-1.33)	1.15 (0.82-1.61)
		GG	6 (1)	5 (1)	8 (2)	1.29 (0.44-3.80)	1.40 (0.44-4.45)	1.06 (0.32-3.52)
						p-trend=0.5099	p-trend=0.9941	p-trend=0.4602
BRCA2	RS206127	CC	183 (43)	145 (41)	165 (40)
		CT	179 (42)	164 (46)	200 (49)	1.27 (0.94-1.71)	1.12 (0.82-1.53)	1.15 (0.85-1.56)
		TT	60 (14)	46 (13)	46 (11)	0.83 (0.53-1.30)	0.86 (0.53-1.39)	0.97 (0.62-1.50)
						p-trend=0.9775	p-trend=0.8648	p-trend=0.8153
BRCA2	RS206129	CC	374 (88)	326 (92)	363 (88)
		CG	50 (12)	29 (8)	49 (12)	0.98 (0.64-1.51)	1.44 (0.88-2.36)	0.67 (0.41-1.09)
		GG	1 (0)	1 (0)	2 (0)	2.01 (0.17-23.30)	2.45 (0.21-28.88)	1.15 (0.07-18.59)
						p-trend=0.9084	p-trend=0.1089	p-trend=0.1313
BRCA2	RS206132	GG	232 (55)	183 (51)	235 (57)
		AG	159 (37)	147 (41)	159 (38)	1.00 (0.75-1.34)	0.86 (0.64-1.17)	1.18 (0.87-1.58)
		AA	34 (8)	26 (7)	20 (5)	0.58 (0.32-1.05)	0.54 (0.29-1.02)	0.99 (0.57-1.72)
						p-trend=0.2447	p-trend=0.0691	p-trend=0.5385
BRCA2	RS206146	GG	326 (77)	251 (71)	299 (72)
		AG	89 (21)	97 (27)	103 (25)	1.26 (0.91-1.76)	0.88 (0.63-1.22)	1.42 (1.02-1.99)
		AA	9 (2)	8 (2)	12 (3)	1.26 (0.52-3.06)	1.28 (0.50-3.24)	1.19 (0.45-3.14)
						p-trend=0.1692	p-trend=0.7313	p-trend=0.0604
BRCA2	RS2761367	TT	121 (28)	87 (24)	108 (26)
		GT	199 (47)	190 (53)	209 (50)	1.14 (0.82-1.58)	0.86 (0.61-1.23)	1.33 (0.95-1.87)
		GG	105 (25)	79 (22)	97 (23)	0.97 (0.66-1.43)	0.94 (0.62-1.43)	1.06 (0.71-1.59)
						p-trend=0.9174	p-trend=0.7600	p-trend=0.7146
BRCA2	RS3092989	GG	255 (60)	211 (59)	236 (57)
		AG	143 (34)	119 (33)	157 (38)	1.23 (0.92-1.65)	1.23 (0.90-1.68)	1.00 (0.73-1.35)
		AA	27 (6)	26 (7)	22 (5)	0.87 (0.48-1.59)	0.72 (0.39-1.33)	1.18 (0.66-2.08)
						p-trend=0.5215	p-trend=0.8779	p-trend=0.7207
BRCA2	RS3752448	TT	299 (70)	257 (72)	292 (70)
		AT	113 (27)	89 (25)	117 (28)	1.03 (0.76-1.41)	1.12 (0.80-1.56)	0.93 (0.67-1.28)
		AA	13 (3)	10 (3)	6 (1)	0.44 (0.16-1.19)	0.51 (0.18-1.47)	0.89 (0.38-2.07)
						p-trend=0.5046	p-trend=0.9476	p-trend=0.6155
BRCA2	RS472817	GG	128 (30)	96 (27)	115 (28)
		AG	198 (47)	187 (53)	211 (51)	1.14 (0.83-1.58)	0.91 (0.64-1.28)	1.26 (0.90-1.76)
		AA	99 (23)	73 (21)	85 (21)	0.90 (0.61-1.32)	0.93 (0.61-1.42)	1.00 (0.67-1.49)
						p-trend=0.6736	p-trend=0.7108	p-trend=0.8929
BRCA2	RS4942485	AA	321 (76)	265 (74)	301 (73)
		AG	96 (23)	87 (24)	100 (24)	1.11 (0.80-1.54)	1.01 (0.72-1.43)	1.08 (0.77-1.50)
		GG	8 (2)	4 (1)	11 (3)	1.51 (0.59-3.85)	2.44 (0.75-7.89)	0.61 (0.18-2.04)
						p-trend=0.3329	p-trend=0.4087	p-trend=0.9947
BRCA2	RS4942505	TT	132 (33)	100 (31)	120 (33)
		CT	206 (51)	166 (51)	183 (50)	1.04 (0.75-1.44)	0.94 (0.67-1.33)	1.08 (0.77-1.50)
		CC	63 (16)	60 (18)	64 (17)	1.14 (0.74-1.76)	0.89 (0.57-1.40)	1.26 (0.81-1.95)
						p-trend=0.5635	p-trend=0.6067	p-trend=0.3239
BRCA2	RS4986860	AA	420 (99)	350 (98)	406 (98)
		AG	5 (1)	6 (2)	8 (2)	1.70 (0.54-5.34)	1.10 (0.37-3.27)	1.34 (0.40-4.44)
		GG	0 ()	0 ()	0 ()	(-)	(-)	(-)
						p-trend=0.3662	p-trend=0.8653	p-trend=0.6372
BRCA2	RS664345	GG	409 (96)	343 (96)	398 (96)
		AG	16 (4)	13 (4)	17 (4)	1.04 (0.52-2.12)	1.08 (0.51-2.29)	0.98 (0.46-2.07)
		AA	0 ()	0 ()	0 ()	(-)	(-)	(-)
						p-trend=0.9034	p-trend=0.8469	p-trend=0.9545
BRCA2	RS7328264	AA	388 (94)	335 (95)	392 (95)
		AG	24 (6)	18 (5)	22 (5)	0.91 (0.50-1.67)	1.09 (0.57-2.10)	0.87 (0.47-1.64)
		GG	0 ()	0 ()	0 ()	(-)	(-)	(-)
						p-trend=0.7631	p-trend=0.7889	p-trend=0.6730
BRCA2	RS7337784	GG	294 (69)	258 (72)	297 (72)
		CG	120 (28)	85 (24)	110 (27)	0.90 (0.66-1.22)	1.11 (0.79-1.56)	0.81 (0.59-1.13)
		CC	11 (3)	13 (4)	8 (2)	0.70 (0.28-1.80)	0.58 (0.23-1.44)	1.34 (0.59-3.05)
						p-trend=0.3526	p-trend=0.8547	p-trend=0.5856
BRCA2	RS762891	GG	251 (59)	208 (58)	220 (53)
		GT	142 (33)	132 (37)	167 (40)	1.34 (1.00-1.80)	1.24 (0.92-1.68)	1.11 (0.83-1.51)
		TT	31 (7)	16 (4)	26 (6)	0.97 (0.55-1.69)	1.53 (0.79-2.98)	0.61 (0.33-1.15)
						p-trend=0.2451	p-trend=0.0842	p-trend=0.5988
BRCA2	RS7988901	AA	412 (97)	336 (94)	398 (96)
		AG	13 (3)	20 (6)	17 (4)	1.37 (0.65-2.88)	0.69 (0.35-1.36)	1.86 (0.91-3.81)
		GG	0 ()	0 ()	0 ()	(-)	(-)	(-)
						p-trend=0.4113	p-trend=0.2851	p-trend=0.0876
BRCA2	RS7992196	AA	421 (99)	349 (98)	408 (99)
		AC	4 (1)	7 (2)	5 (1)	1.31 (0.34-5.04)	0.56 (0.17-1.82)	2.10 (0.61-7.23)
		CC	0 ()	0 ()	0 ()	(-)	(-)	(-)
						p-trend=0.6961	p-trend=0.3341	p-trend=0.2414
BRCA2	RS898602	GG	405 (95)	341 (96)	401 (97)
		AG	19 (4)	15 (4)	14 (3)	0.71 (0.35-1.46)	0.74 (0.34-1.57)	0.96 (0.48-1.91)
		AA	1 (0)	0 ()	0 (0)	0.00 (0.00-I)	(-)	0.00 (0.00-I)
						p-trend=0.2123	p-trend=0.4279	p-trend=0.6890
BRCA2	RS9534154	GG	264 (62)	219 (62)	244 (59)
		AG	137 (32)	113 (32)	150 (36)	1.21 (0.90-1.63)	1.23 (0.90-1.68)	0.99 (0.72-1.34)
		AA	24 (6)	24 (7)	21 (5)	0.92 (0.50-1.71)	0.74 (0.40-1.39)	1.22 (0.67-2.21)
						p-trend=0.4842	p-trend=0.8009	p-trend=0.7057
BRCA2	RS9534262	CC	132 (31)	99 (28)	122 (29)
		CT	216 (51)	181 (51)	204 (49)	1.10 (0.80-1.52)	0.96 (0.68-1.35)	1.13 (0.81-1.57)
		TT	77 (18)	76 (21)	89 (21)	1.29 (0.87-1.92)	0.96 (0.64-1.46)	1.32 (0.88-1.99)
						p-trend=0.2159	p-trend=0.8461	p-trend=0.1848
BRCA2	RS9534367	CC	367 (86)	308 (87)	345 (83)
		CT	56 (13)	46 (13)	62 (15)	1.16 (0.78-1.72)	1.17 (0.77-1.78)	0.99 (0.65-1.51)
		TT	2 (0)	1 (0)	7 (2)	3.37 (0.69-16.57)	5.72 (0.69-47.72)	0.60 (0.05-6.70)
						p-trend=0.1687	p-trend=0.1414	p-trend=0.8594
BRCA2	RS9562605	CC	259 (61)	233 (65)	240 (58)
		CT	147 (35)	110 (31)	147 (36)	1.08 (0.81-1.45)	1.33 (0.97-1.82)	0.83 (0.61-1.13)
		TT	19 (4)	13 (4)	27 (7)	1.60 (0.86-2.97)	2.06 (1.02-4.15)	0.75 (0.36-1.55)
						p-trend=0.1975	p-trend=0.0127	p-trend=0.1853
BRCA2	RS9567552	GG	289 (68)	255 (72)	284 (68)
		GT	125 (29)	93 (26)	117 (28)	0.93 (0.69-1.27)	1.11 (0.80-1.54)	0.85 (0.62-1.17)
		TT	11 (3)	8 (2)	14 (3)	1.27 (0.56-2.88)	1.60 (0.65-3.97)	0.84 (0.33-2.11)
						p-trend=0.9694	p-trend=0.2990	p-trend=0.3151
BRCA2	RS9567576	TT	276 (65)	240 (67)	272 (66)
		GT	132 (31)	99 (28)	126 (31)	0.97 (0.72-1.30)	1.11 (0.80-1.53)	0.87 (0.64-1.19)
		GG	17 (4)	17 (5)	14 (3)	0.85 (0.41-1.78)	0.78 (0.37-1.65)	1.15 (0.58-2.31)
						p-trend=0.6766	p-trend=0.9574	p-trend=0.7061
BRCA2	RS9590896	GG	315 (74)	262 (74)	309 (75)
		AG	101 (24)	88 (25)	100 (24)	1.01 (0.73-1.40)	0.97 (0.69-1.36)	1.04 (0.75-1.45)
		AA	9 (2)	6 (2)	5 (1)	0.48 (0.16-1.48)	0.70 (0.20-2.41)	0.82 (0.29-2.34)
						p-trend=0.5830	p-trend=0.6906	p-trend=0.9856
BRCA2	RS9595307	GG	409 (96)	343 (96)	401 (97)
		AG	16 (4)	13 (4)	14 (3)	0.93 (0.44-1.95)	0.97 (0.44-2.13)	0.95 (0.45-2.01)
		AA	0 ()	0 ()	0 ()	(-)	(-)	(-)
						p-trend=0.8439	p-trend=0.9448	p-trend=0.8990
BRCA2	RS9943876	CC	154 (36)	142 (40)	166 (40)
		CT	212 (50)	168 (47)	187 (45)	0.86 (0.63-1.15)	0.98 (0.72-1.34)	0.85 (0.63-1.16)
		TT	59 (14)	46 (13)	61 (15)	0.90 (0.59-1.38)	1.08 (0.69-1.70)	0.84 (0.54-1.31)
						p-trend=0.4522	p-trend=0.8191	p-trend=0.3182
BRCA2	RS9943888	AA	239 (56)	200 (56)	230 (56)
		AG	157 (37)	138 (39)	164 (40)	1.09 (0.81-1.45)	1.06 (0.78-1.43)	1.04 (0.77-1.40)
		GG	29 (7)	17 (5)	20 (5)	0.72 (0.39-1.32)	0.98 (0.49-1.95)	0.69 (0.37-1.30)
						p-trend=0.7615	p-trend=0.8180	p-trend=0.5904
BRD4	RS10415990	GG	420 ()	349 ()	409 ()
		AG	0 ()	0 ()	0 ()	(-)	(-)	(-)
		AA	0 ()	0 ()	0 ()	(-)	(-)	(-)
						p-trend=	p-trend=	p-trend=
BRD4	RS10423828	TT	416 (98)	342 (96)	403 (97)
		CT	9 (2)	14 (4)	12 (3)	1.55 (0.64-3.76)	0.84 (0.37-1.88)	1.82 (0.77-4.26)
		CC	0 ()	0 ()	0 ()	(-)	(-)	(-)
						p-trend=0.3355	p-trend=0.6689	p-trend=0.1695
BRD4	RS11670707	CC	359 (85)	283 (79)	335 (81)
		CT	60 (14)	72 (20)	75 (18)	1.33 (0.91-1.93)	0.94 (0.65-1.36)	1.53 (1.05-2.23)
		TT	4 (1)	1 (0)	3 (1)	0.80 (0.17-3.67)	2.37 (0.24-23.44)	0.31 (0.03-2.77)
						p-trend=0.2347	p-trend=0.9521	p-trend=0.1017
BRD4	RS11880801	GG	340 (80)	268 (75)	318 (77)
		GT	80 (19)	86 (24)	93 (22)	1.23 (0.88-1.73)	0.96 (0.68-1.35)	1.38 (0.97-1.94)
		TT	5 (1)	2 (1)	3 (1)	0.61 (0.14-2.62)	1.24 (0.20-7.66)	0.50 (0.10-2.61)
						p-trend=0.4163	p-trend=0.8757	p-trend=0.1851
BRD4	RS17707730	GG	421 (99)	349 (98)	407 (98)
		AG	4 (1)	7 (2)	8 (2)	2.32 (0.68-7.88)	1.06 (0.37-3.06)	2.06 (0.60-7.10)
		AA	0 ()	0 ()	0 ()	(-)	(-)	(-)
						p-trend=0.1782	p-trend=0.9121	p-trend=0.2541
BRD4	RS2079014	TT	221 (52)	196 (55)	242 (58)
		CT	177 (42)	136 (38)	154 (37)	0.82 (0.61-1.09)	0.92 (0.68-1.25)	0.86 (0.64-1.16)
		CC	27 (6)	24 (7)	19 (5)	0.65 (0.35-1.21)	0.63 (0.33-1.20)	0.99 (0.55-1.78)
						p-trend=0.0763	p-trend=0.2239	p-trend=0.5154
BRD4	RS2240304	CC	345 (81)	275 (77)	325 (79)
		CT	75 (18)	79 (22)	85 (21)	1.18 (0.83-1.67)	0.95 (0.67-1.36)	1.34 (0.94-1.91)
		TT	5 (1)	2 (1)	4 (1)	0.78 (0.21-2.99)	1.56 (0.28-8.77)	0.50 (0.10-2.58)
						p-trend=0.5205	p-trend=0.9408	p-trend=0.2632
BRD4	RS4808272	AA	154 (36)	123 (35)	159 (38)
		AG	212 (50)	182 (51)	209 (50)	0.97 (0.72-1.30)	0.90 (0.66-1.24)	1.07 (0.79-1.46)
		GG	59 (14)	51 (14)	47 (11)	0.78 (0.50-1.22)	0.75 (0.47-1.20)	1.07 (0.69-1.67)
						p-trend=0.3508	p-trend=0.2319	p-trend=0.6866
BRD4	RS4809130	CC	398 (94)	339 (95)	389 (94)
		CT	27 (6)	16 (4)	26 (6)	0.98 (0.56-1.73)	1.47 (0.77-2.84)	0.69 (0.37-1.31)
		TT	0 ()	1 (0)	0 ()	(-)	0.00 (0.00-I)	214520 (0.00-I)
						p-trend=0.9467	p-trend=0.3782	p-trend=0.4369
BRD4	RS7253596	CC	336 (79)	263 (74)	313 (76)
		CT	84 (20)	91 (26)	98 (24)	1.25 (0.89-1.75)	0.97 (0.69-1.36)	1.39 (0.99-1.95)
		TT	5 (1)	2 (1)	3 (1)	0.61 (0.14-2.63)	1.24 (0.20-7.68)	0.50 (0.10-2.63)
						p-trend=0.3560	p-trend=0.9376	p-trend=0.1500
BRD4	RS7255065	CC	346 (81)	275 (77)	325 (79)
		CT	73 (17)	80 (22)	85 (21)	1.21 (0.85-1.72)	0.95 (0.66-1.35)	1.40 (0.98-1.99)
		TT	6 (1)	1 (0)	4 (1)	0.67 (0.18-2.43)	2.96 (0.32-27.25)	0.21 (0.02-1.73)
						p-trend=0.5231	p-trend=0.9590	p-trend=0.3062
BRD4	RS8104223	AA	294 (70)	247 (71)	298 (72)
		AG	121 (29)	98 (28)	102 (25)	0.84 (0.61-1.15)	0.82 (0.59-1.15)	0.97 (0.71-1.34)
		GG	6 (1)	5 (1)	12 (3)	1.91 (0.70-5.23)	1.92 (0.65-5.63)	0.97 (0.29-3.23)
						p-trend=0.8003	p-trend=0.7461	p-trend=0.8695
BRD4	RS8111323	AA	420 (99)	353 (99)	408 (98)
		AG	5 (1)	3 (1)	7 (2)	1.27 (0.39-4.08)	1.94 (0.49-7.71)	0.74 (0.18-3.14)
		GG	0 ()	0 ()	0 ()	(-)	(-)	(-)
						p-trend=0.6912	p-trend=0.3494	p-trend=0.6846
BRIP1	RS11079454	TT	233 (55)	193 (55)	241 (58)
		AT	160 (38)	138 (39)	148 (36)	0.90 (0.67-1.21)	0.84 (0.62-1.15)	1.05 (0.78-1.41)
		AA	30 (7)	22 (6)	24 (6)	0.72 (0.41-1.28)	0.90 (0.48-1.67)	0.88 (0.49-1.58)
						p-trend=0.2333	p-trend=0.3574	p-trend=0.9338
BRIP1	RS11652980	CC	410 (96)	340 (96)	395 (95)
		CG	15 (4)	16 (4)	20 (5)	1.38 (0.69-2.76)	1.10 (0.55-2.20)	1.28 (0.62-2.62)
		GG	0 ()	0 ()	0 ()	(-)	(-)	(-)
						p-trend=0.3644	p-trend=0.7793	p-trend=0.5064
BRIP1	RS12452396	TT	186 (44)	146 (41)	161 (39)
		CT	190 (45)	168 (48)	197 (48)	1.24 (0.93-1.67)	1.08 (0.79-1.48)	1.12 (0.83-1.51)
		CC	44 (10)	38 (11)	53 (13)	1.36 (0.86-2.15)	1.28 (0.79-2.08)	1.10 (0.68-1.79)
						p-trend=0.1016	p-trend=0.3276	p-trend=0.5248
BRIP1	RS12453966	TT	106 (25)	82 (23)	103 (25)
		CT	220 (52)	187 (53)	202 (49)	0.99 (0.71-1.39)	0.88 (0.61-1.26)	1.09 (0.77-1.54)
		CC	99 (23)	87 (24)	109 (26)	1.19 (0.80-1.75)	1.05 (0.69-1.59)	1.11 (0.74-1.68)
						p-trend=0.3950	p-trend=0.8135	p-trend=0.6064
BRIP1	RS12937080	AA	385 (91)	330 (93)	391 (94)
		AG	38 (9)	26 (7)	22 (5)	0.55 (0.32-0.95)	0.77 (0.42-1.41)	0.80 (0.47-1.34)
		GG	2 (0)	0 (0)	2 (0)	0.99 (0.13-7.29)	428820 (0.00-I)	0.00 (0.00-I)
						p-trend=0.0602	p-trend=0.7647	p-trend=0.2212
BRIP1	RS16945628	TT	128 (30)	108 (30)	136 (33)
		CT	216 (51)	178 (50)	201 (48)	0.88 (0.64-1.21)	0.85 (0.61-1.19)	0.98 (0.71-1.36)
		CC	81 (19)	70 (20)	78 (19)	0.89 (0.60-1.33)	0.86 (0.57-1.32)	1.03 (0.68-1.55)
						p-trend=0.5172	p-trend=0.4284	p-trend=0.9246
BRIP1	RS16945643	AA	360 (85)	300 (84)	339 (82)
		AG	65 (15)	55 (15)	75 (18)	1.22 (0.84-1.76)	1.21 (0.82-1.80)	1.03 (0.69-1.52)
		GG	0 (0)	1 (0)	1 (0)	152980 (0.00-I)	0.57 (0.04-9.17)	273819 (0.00-I)
						p-trend=0.2440	p-trend=0.4075	p-trend=0.7353
BRIP1	RS16945670	TT	340 (83)	300 (85)	344 (85)
		GT	70 (17)	52 (15)	59 (14)	0.83 (0.57-1.22)	0.99 (0.66-1.50)	0.84 (0.57-1.25)
		GG	2 (0)	1 (0)	4 (1)	2.08 (0.37-11.75)	3.73 (0.39-35.38)	0.51 (0.05-5.73)
						p-trend=0.6068	p-trend=0.6661	p-trend=0.3313
BRIP1	RS2048718	TT	116 (27)	116 (33)	128 (31)
		CT	218 (51)	165 (46)	206 (50)	0.83 (0.60-1.15)	1.06 (0.76-1.47)	0.76 (0.55-1.06)
		CC	90 (21)	75 (21)	79 (19)	0.76 (0.51-1.14)	0.91 (0.60-1.38)	0.84 (0.56-1.25)
						p-trend=0.1685	p-trend=0.7411	p-trend=0.3131
BRIP1	RS2191248	CC	241 (57)	220 (62)	239 (58)
		CT	164 (39)	119 (33)	152 (37)	0.91 (0.68-1.21)	1.09 (0.80-1.49)	0.80 (0.59-1.08)
		TT	20 (5)	17 (5)	23 (6)	1.18 (0.62-2.22)	1.19 (0.61-2.32)	0.93 (0.47-1.82)
						p-trend=0.8905	p-trend=0.4807	p-trend=0.2447
BRIP1	RS2378908	GG	320 (75)	254 (71)	296 (71)
		AG	97 (23)	88 (25)	110 (27)	1.20 (0.87-1.66)	1.11 (0.79-1.55)	1.14 (0.82-1.59)
		AA	8 (2)	14 (4)	9 (2)	1.21 (0.46-3.22)	0.54 (0.22-1.28)	2.24 (0.92-5.44)
						p-trend=0.2565	p-trend=0.7282	p-trend=0.1057
BRIP1	RS4968446	GG	299 (71)	265 (74)	286 (70)
		CG	108 (26)	87 (24)	109 (27)	1.04 (0.76-1.43)	1.14 (0.81-1.59)	0.91 (0.66-1.27)
		CC	13 (3)	4 (1)	15 (4)	1.16 (0.54-2.52)	2.97 (0.96-9.23)	0.35 (0.11-1.09)
						p-trend=0.6715	p-trend=0.1018	p-trend=0.1584
BRIP1	RS4968451	AA	296 (70)	247 (69)	290 (70)
		AC	121 (28)	95 (27)	113 (27)	0.96 (0.70-1.30)	1.07 (0.77-1.49)	0.94 (0.68-1.29)
		CC	8 (2)	14 (4)	12 (3)	1.55 (0.62-3.89)	0.71 (0.32-1.58)	2.11 (0.87-5.14)
						p-trend=0.8103	p-trend=0.8418	p-trend=0.5553
BRIP1	RS4988343	CC	417 (98)	347 (97)	408 (98)
		CT	8 (2)	9 (3)	7 (2)	1.02 (0.36-2.88)	0.69 (0.25-1.92)	1.32 (0.50-3.48)
		TT	0 ()	0 ()	0 ()	(-)	(-)	(-)
						p-trend=0.9699	p-trend=0.4800	p-trend=0.5689
BRIP1	RS6504074	GG	144 (34)	117 (33)	126 (31)
		GT	204 (48)	171 (48)	203 (49)	1.18 (0.86-1.61)	1.08 (0.78-1.51)	1.03 (0.75-1.41)
		TT	77 (18)	67 (19)	84 (20)	1.24 (0.84-1.85)	1.18 (0.78-1.79)	1.07 (0.71-1.61)
						p-trend=0.2454	p-trend=0.4348	p-trend=0.7470
BRIP1	RS7212340	GG	391 (92)	328 (92)	368 (89)
		CG	33 (8)	28 (8)	47 (11)	1.59 (0.99-2.57)	1.52 (0.92-2.52)	1.04 (0.61-1.75)
		CC	1 (0)	0 ()	0 (0)	0.00 (0.00-I)	(-)	0.00 (0.00-I)
						p-trend=0.1082	p-trend=0.1042	p-trend=0.9322
BRIP1	RS9897928	TT	142 (33)	117 (33)	149 (36)
		AT	223 (52)	180 (51)	194 (47)	0.85 (0.62-1.15)	0.85 (0.62-1.18)	0.97 (0.71-1.33)
		AA	60 (14)	59 (17)	72 (17)	1.17 (0.77-1.79)	1.03 (0.67-1.59)	1.17 (0.76-1.81)
						p-trend=0.7627	p-trend=0.8945	p-trend=0.6016
BRIP1	RS9908659	TT	195 (46)	174 (49)	191 (47)
		CT	192 (45)	150 (42)	172 (42)	0.92 (0.69-1.23)	1.01 (0.74-1.38)	0.88 (0.65-1.18)
		CC	36 (9)	31 (9)	45 (11)	1.22 (0.75-1.99)	1.26 (0.75-2.10)	0.98 (0.58-1.64)
						p-trend=0.7809	p-trend=0.4989	p-trend=0.5825
C15orf48	RS12440038	GG	130 (31)	109 (31)	132 (32)
		AG	212 (50)	180 (51)	202 (49)	0.96 (0.70-1.31)	0.92 (0.66-1.28)	1.01 (0.73-1.40)
		AA	82 (19)	67 (19)	81 (20)	0.99 (0.67-1.48)	0.97 (0.63-1.47)	0.99 (0.65-1.49)
						p-trend=0.9381	p-trend=0.8080	p-trend=0.9738
C15orf48	RS1288847	CC	376 (88)	305 (86)	349 (84)
		CT	45 (11)	49 (14)	62 (15)	1.43 (0.94-2.17)	1.05 (0.69-1.59)	1.37 (0.89-2.11)
		TT	4 (1)	2 (1)	4 (1)	0.93 (0.23-3.80)	1.58 (0.28-8.91)	0.62 (0.11-3.42)
						p-trend=0.1620	p-trend=0.6631	p-trend=0.3181
C15orf48	RS1288861	AA	302 (71)	244 (69)	278 (67)
		AG	110 (26)	98 (28)	126 (30)	1.25 (0.92-1.70)	1.07 (0.78-1.48)	1.11 (0.80-1.53)
		GG	13 (3)	14 (4)	10 (2)	0.92 (0.39-2.15)	0.66 (0.28-1.54)	1.36 (0.62-2.95)
						p-trend=0.3111	p-trend=0.8416	p-trend=0.3577
C15orf48	RS1547487	GG	222 (52)	193 (54)	226 (54)
		AG	167 (39)	136 (38)	160 (39)	0.93 (0.70-1.24)	1.02 (0.75-1.38)	0.94 (0.70-1.27)
		AA	36 (8)	27 (8)	29 (7)	0.81 (0.48-1.38)	0.91 (0.52-1.62)	0.86 (0.51-1.48)
						p-trend=0.4164	p-trend=0.8884	p-trend=0.5534
C15orf48	RS1974981	GG	130 (31)	108 (30)	123 (30)
		AG	209 (49)	179 (50)	207 (50)	1.05 (0.76-1.44)	0.99 (0.71-1.39)	1.04 (0.75-1.43)
		AA	85 (20)	69 (19)	84 (20)	1.04 (0.70-1.55)	1.02 (0.67-1.55)	1.00 (0.66-1.50)
						p-trend=0.8144	p-trend=0.9447	p-trend=0.9849
C15orf48	RS2453518	AA	297 (70)	244 (69)	269 (65)
		AG	116 (27)	96 (27)	131 (32)	1.21 (0.89-1.64)	1.15 (0.83-1.59)	1.02 (0.74-1.40)
		GG	12 (3)	15 (4)	14 (3)	1.37 (0.62-3.06)	0.83 (0.39-1.80)	1.55 (0.71-3.38)
						p-trend=0.1647	p-trend=0.7186	p-trend=0.4669
C15orf48	RS2467858	GG	170 (40)	150 (42)	179 (43)
		AG	196 (46)	166 (47)	183 (44)	0.90 (0.67-1.21)	0.93 (0.68-1.26)	0.96 (0.71-1.30)
		AA	59 (14)	40 (11)	52 (13)	0.85 (0.55-1.32)	1.05 (0.65-1.69)	0.77 (0.49-1.22)
						p-trend=0.3952	p-trend=0.9475	p-trend=0.3415
C15orf48	RS2467880	AA	403 (95)	327 (92)	378 (91)
		AG	21 (5)	28 (8)	34 (8)	1.70 (0.96-3.01)	1.02 (0.60-1.74)	1.66 (0.92-2.98)
		GG	0 (0)	1 (0)	3 (1)	420138 (0.00-I)	2.00 (0.20-19.77)	237990 (0.00-I)
						p-trend=0.0234	p-trend=0.7392	p-trend=0.0555
C15orf48	RS3737267	AA	259 (61)	242 (68)	261 (63)
		AG	148 (35)	100 (28)	133 (32)	0.90 (0.67-1.21)	1.27 (0.92-1.74)	0.72 (0.53-0.98)
		GG	18 (4)	14 (4)	21 (5)	1.19 (0.61-2.30)	1.35 (0.66-2.76)	0.81 (0.39-1.67)
						p-trend=0.8436	p-trend=0.1280	p-trend=0.0653
C15orf48	RS7169252	CC	413 (97)	345 (97)	408 (98)
		CG	10 (2)	11 (3)	7 (2)	0.61 (0.23-1.65)	0.49 (0.18-1.31)	1.36 (0.57-3.25)
		GG	1 (0)	0 ()	0 (0)	0.00 (0.00-I)	(-)	0.00 (0.00-I)
						p-trend=0.2095	p-trend=0.1575	p-trend=0.7970
C15orf48	RS7175618	TT	396 (93)	311 (87)	384 (93)
		CT	28 (7)	44 (12)	30 (7)	1.07 (0.62-1.84)	0.54 (0.33-0.89)	2.03 (1.23-3.34)
		CC	1 (0)	1 (0)	1 (0)	0.95 (0.06-15.65)	0.72 (0.04-12.03)	1.22 (0.08-19.76)
						p-trend=0.8269	p-trend=0.0181	p-trend=0.0076
C15orf48	RS8027613	GG	421 (99)	347 (97)	411 (99)
		AG	4 (1)	9 (3)	3 (1)	0.66 (0.14-3.04)	0.29 (0.08-1.10)	2.76 (0.84-9.06)
		AA	0 ()	0 ()	0 ()	(-)	(-)	(-)
						p-trend=0.5965	p-trend=0.0687	p-trend=0.0945
C15orf48	RS8035573	CC	402 (95)	341 (96)	389 (94)
		CT	21 (5)	15 (4)	24 (6)	1.09 (0.59-2.00)	1.27 (0.65-2.49)	0.87 (0.44-1.72)
		TT	2 (0)	0 (0)	1 (0)	0.43 (0.04-4.88)	113286 (0.00-I)	0.00 (0.00-I)
						p-trend=0.9375	p-trend=0.3805	p-trend=0.3653
C19orf40	RS10401336	CC	150 (35)	104 (29)	128 (31)
		CT	190 (45)	181 (51)	205 (50)	1.27 (0.93-1.73)	0.93 (0.67-1.30)	1.37 (0.99-1.89)
		TT	85 (20)	71 (20)	81 (20)	1.11 (0.75-1.64)	0.92 (0.60-1.40)	1.21 (0.81-1.81)
						p-trend=0.4465	p-trend=0.6596	p-trend=0.2365
C19orf40	RS10403940	GG	366 (86)	312 (88)	361 (87)
		AG	57 (13)	41 (12)	53 (13)	0.95 (0.63-1.42)	1.16 (0.74-1.82)	0.84 (0.55-1.29)
		AA	2 (0)	2 (1)	1 (0)	0.47 (0.04-5.41)	0.43 (0.04-4.85)	1.15 (0.16-8.24)
						p-trend=0.6632	p-trend=0.7041	p-trend=0.5028
C19orf40	RS11878354	AA	407 (96)	339 (95)	395 (95)
		AG	16 (4)	17 (5)	20 (5)	1.34 (0.68-2.65)	0.92 (0.47-1.83)	1.29 (0.64-2.59)
		GG	2 (0)	0 ()	0 (0)	0.00 (0.00-I)	(-)	0.00 (0.00-I)
						p-trend=0.8537	p-trend=0.8199	p-trend=0.9454
C19orf40	RS16967665	CC	327 (77)	266 (75)	309 (75)
		CT	92 (22)	81 (23)	95 (23)	1.13 (0.81-1.57)	1.06 (0.75-1.50)	1.08 (0.77-1.51)
		TT	5 (1)	7 (2)	9 (2)	1.71 (0.56-5.21)	1.04 (0.37-2.91)	1.71 (0.54-5.48)
						p-trend=0.2935	p-trend=0.7604	p-trend=0.4267
C19orf40	RS16967668	CC	325 (76)	276 (78)	317 (76)
		CT	90 (21)	73 (21)	90 (22)	1.00 (0.72-1.41)	1.13 (0.79-1.62)	0.96 (0.67-1.35)
		TT	10 (2)	7 (2)	8 (2)	0.78 (0.30-2.02)	1.02 (0.36-2.91)	0.85 (0.32-2.27)
						p-trend=0.8022	p-trend=0.5665	p-trend=0.7043
C19orf40	RS2304101	AA	163 (38)	160 (45)	173 (42)
		AC	186 (44)	154 (43)	181 (44)	0.92 (0.68-1.25)	1.11 (0.81-1.52)	0.84 (0.62-1.14)
		CC	76 (18)	41 (12)	61 (15)	0.77 (0.52-1.16)	1.37 (0.86-2.17)	0.54 (0.35-0.84)
						p-trend=0.2330	p-trend=0.1901	p-trend=0.0090
C19orf40	RS2304102	AA	130 (31)	120 (34)	131 (32)
		AG	191 (45)	177 (50)	209 (50)	1.07 (0.78-1.47)	1.09 (0.79-1.51)	1.01 (0.73-1.39)
		GG	104 (24)	59 (17)	75 (18)	0.73 (0.49-1.08)	1.20 (0.78-1.84)	0.61 (0.41-0.91)
						p-trend=0.1644	p-trend=0.4057	p-trend=0.0304
C19orf40	RS2404713	GG	111 (26)	95 (27)	113 (30)
		AG	202 (48)	185 (53)	211 (56)	1.03 (0.74-1.43)	0.95 (0.67-1.34)	1.07 (0.76-1.50)
		AA	106 (25)	70 (20)	55 (15)	0.52 (0.34-0.79)	0.70 (0.44-1.10)	0.77 (0.51-1.16)
						p-trend=0.0057	p-trend=0.1534	p-trend=0.2380
C19orf40	RS3816032	TT	291 (68)	263 (74)	315 (76)
		CT	120 (28)	89 (25)	86 (21)	0.67 (0.49-0.93)	0.79 (0.56-1.11)	0.82 (0.59-1.13)
		CC	14 (3)	4 (1)	13 (3)	0.95 (0.43-2.08)	2.74 (0.86-8.70)	0.30 (0.10-0.93)
						p-trend=0.0602	p-trend=0.8712	p-trend=0.0352
C19orf40	RS4805025	CC	165 (39)	113 (32)	144 (35)
		CT	183 (43)	179 (50)	201 (48)	1.26 (0.93-1.71)	0.89 (0.64-1.24)	1.42 (1.04-1.95)
		TT	77 (18)	64 (18)	70 (17)	0.99 (0.67-1.48)	0.84 (0.54-1.28)	1.22 (0.81-1.84)
						p-trend=0.6987	p-trend=0.3830	p-trend=0.1669
C19orf40	RS4805840	GG	373 (88)	317 (89)	374 (90)
		AG	51 (12)	37 (10)	40 (10)	0.78 (0.50-1.21)	0.88 (0.54-1.43)	0.86 (0.55-1.35)
		AA	1 (0)	2 (1)	1 (0)	1.19 (0.07-19.27)	0.60 (0.05-6.71)	2.21 (0.20-24.61)
						p-trend=0.3027	p-trend=0.5294	p-trend=0.7005
C19orf40	RS7247715	CC	370 (87)	309 (87)	369 (89)
		CT	55 (13)	45 (13)	45 (11)	0.81 (0.53-1.24)	0.88 (0.56-1.38)	0.98 (0.64-1.50)
		TT	0 (0)	2 (1)	1 (0)	240148 (0.00-I)	0.41 (0.04-4.73)	683881 (0.00-I)
						p-trend=0.4554	p-trend=0.4316	p-trend=0.7196
C19orf40	RS7258185	GG	157 (37)	110 (31)	133 (32)
		AG	187 (44)	176 (49)	206 (50)	1.31 (0.96-1.79)	0.97 (0.70-1.35)	1.34 (0.98-1.85)
		AA	81 (19)	70 (20)	73 (18)	1.04 (0.70-1.55)	0.84 (0.55-1.29)	1.24 (0.83-1.85)
						p-trend=0.5470	p-trend=0.4693	p-trend=0.1902
C19orf40	RS7258303	CC	357 (84)	315 (88)	359 (87)
		CT	62 (15)	41 (12)	51 (12)	0.80 (0.54-1.21)	1.05 (0.67-1.65)	0.75 (0.49-1.14)
		TT	6 (1)	0 (0)	4 (1)	0.67 (0.18-2.44)	1360221 (0.00-I)	0.00 (0.00-I)
						p-trend=0.2326	p-trend=0.3457	p-trend=0.0306
C19orf40	RS751731	GG	232 (55)	211 (59)	250 (60)
		AG	159 (37)	131 (37)	134 (32)	0.81 (0.60-1.09)	0.86 (0.63-1.17)	0.90 (0.67-1.21)
		AA	34 (8)	14 (4)	31 (7)	0.89 (0.52-1.51)	1.67 (0.85-3.27)	0.45 (0.23-0.85)
						p-trend=0.2653	p-trend=0.7610	p-trend=0.0395
C19orf40	RS751732	CC	336 (79)	276 (78)	317 (76)
		CT	85 (20)	74 (21)	90 (22)	1.12 (0.80-1.57)	1.07 (0.75-1.53)	1.06 (0.75-1.51)
		TT	4 (1)	6 (2)	8 (2)	2.05 (0.60-6.95)	1.03 (0.35-3.06)	1.87 (0.52-6.73)
						p-trend=0.2761	p-trend=0.7306	p-trend=0.4655
C19orf40	RS8106312	TT	125 (29)	106 (30)	121 (29)
		CT	187 (44)	184 (52)	211 (51)	1.18 (0.86-1.63)	1.02 (0.73-1.42)	1.16 (0.84-1.62)
		CC	113 (27)	66 (19)	83 (20)	0.77 (0.53-1.13)	1.09 (0.71-1.66)	0.69 (0.46-1.03)
						p-trend=0.2444	p-trend=0.7164	p-trend=0.1045
C19orf40	RS8107282	GG	201 (47)	162 (46)	197 (47)
		AG	162 (38)	166 (47)	174 (42)	1.13 (0.84-1.52)	0.86 (0.63-1.17)	1.27 (0.94-1.72)
		AA	62 (15)	28 (8)	44 (11)	0.75 (0.48-1.16)	1.19 (0.70-2.03)	0.55 (0.34-0.91)
						p-trend=0.5133	p-trend=0.9482	p-trend=0.2974
C19orf40	RS8109798	TT	313 (74)	256 (72)	297 (72)
		GT	100 (24)	88 (25)	113 (27)	1.21 (0.88-1.66)	1.14 (0.82-1.59)	1.07 (0.76-1.48)
		GG	12 (3)	12 (3)	5 (1)	0.41 (0.14-1.19)	0.45 (0.15-1.33)	1.21 (0.54-2.75)
						p-trend=0.8944	p-trend=0.9115	p-trend=0.5803
CADM1	RS10047420	AA	211 (50)	170 (48)	219 (53)
		AG	183 (43)	145 (41)	158 (38)	0.78 (0.58-1.04)	0.79 (0.58-1.07)	1.00 (0.74-1.34)
		GG	31 (7)	41 (12)	35 (8)	1.06 (0.63-1.80)	0.63 (0.38-1.04)	1.67 (1.00-2.79)
						p-trend=0.4155	p-trend=0.0370	p-trend=0.1623
CADM1	RS1013416	TT	163 (38)	153 (43)	161 (39)
		GT	211 (50)	165 (46)	189 (46)	0.92 (0.68-1.24)	1.12 (0.82-1.53)	0.83 (0.61-1.12)
		GG	50 (12)	38 (11)	64 (15)	1.30 (0.84-2.01)	1.67 (1.05-2.68)	0.82 (0.51-1.32)
						p-trend=0.4645	p-trend=0.0482	p-trend=0.2391
CADM1	RS10160742	CC	338 (80)	265 (74)	344 (83)
		CT	77 (18)	83 (23)	69 (17)	0.87 (0.60-1.25)	0.65 (0.45-0.94)	1.37 (0.97-1.95)
		TT	10 (2)	8 (2)	2 (0)	0.19 (0.04-0.90)	0.14 (0.03-0.68)	1.05 (0.41-2.69)
						p-trend=0.0750	p-trend=0.0014	p-trend=0.1451
CADM1	RS10458966	TT	127 (30)	97 (27)	110 (27)
		CT	195 (46)	170 (48)	201 (48)	1.12 (0.81-1.56)	1.02 (0.72-1.45)	1.17 (0.83-1.64)
		CC	100 (24)	89 (25)	104 (25)	1.17 (0.80-1.71)	1.07 (0.71-1.60)	1.18 (0.80-1.74)
						p-trend=0.4149	p-trend=0.7479	p-trend=0.3901
CADM1	RS10458969	GG	335 (79)	281 (79)	330 (80)
		AG	85 (20)	72 (20)	82 (20)	0.99 (0.70-1.39)	0.90 (0.62-1.29)	1.01 (0.71-1.44)
		AA	5 (1)	3 (1)	3 (1)	0.60 (0.14-2.60)	0.96 (0.19-4.99)	0.72 (0.17-3.04)
						p-trend=0.7278	p-trend=0.5838	p-trend=0.9024
CADM1	RS10488707	CC	348 (82)	282 (79)	341 (82)
		CT	74 (17)	68 (19)	70 (17)	0.98 (0.68-1.42)	0.84 (0.58-1.23)	1.14 (0.79-1.64)
		TT	3 (1)	6 (2)	3 (1)	1.26 (0.25-6.39)	0.39 (0.09-1.62)	2.53 (0.62-10.21)
						p-trend=0.9834	p-trend=0.1701	p-trend=0.2234
CADM1	RS10502202	CC	118 (28)	122 (34)	115 (28)
		CT	230 (54)	168 (47)	208 (50)	0.94 (0.68-1.30)	1.36 (0.97-1.89)	0.70 (0.51-0.97)
		TT	77 (18)	66 (19)	91 (22)	1.27 (0.85-1.91)	1.50 (0.99-2.27)	0.83 (0.54-1.25)
						p-trend=0.3072	p-trend=0.0431	p-trend=0.2110
CADM1	RS10790077	TT	227 (53)	207 (58)	236 (57)
		CT	162 (38)	127 (36)	152 (37)	0.86 (0.64-1.15)	0.98 (0.72-1.33)	0.87 (0.64-1.17)
		CC	36 (8)	22 (6)	27 (7)	0.71 (0.41-1.21)	0.95 (0.52-1.75)	0.68 (0.39-1.19)
						p-trend=0.1419	p-trend=0.8478	p-trend=0.1371
CADM1	RS10891802	CC	202 (48)	167 (47)	180 (44)
		AC	173 (41)	150 (42)	197 (48)	1.21 (0.90-1.61)	1.22 (0.90-1.65)	1.05 (0.78-1.42)
		AA	50 (12)	39 (11)	36 (9)	0.81 (0.50-1.31)	0.88 (0.53-1.47)	0.94 (0.59-1.50)
						p-trend=0.9997	p-trend=0.7639	p-trend=0.9710
CADM1	RS10891814	AA	136 (32)	122 (35)	141 (34)
		AC	204 (48)	171 (49)	192 (47)	0.87 (0.64-1.19)	0.92 (0.67-1.28)	0.93 (0.68-1.28)
		CC	85 (20)	59 (17)	77 (19)	0.82 (0.55-1.22)	1.10 (0.72-1.69)	0.78 (0.51-1.17)
						p-trend=0.3003	p-trend=0.7909	p-trend=0.2477
CADM1	RS10891819	TT	152 (36)	113 (32)	143 (34)
		GT	209 (49)	180 (51)	204 (49)	1.03 (0.76-1.39)	0.88 (0.64-1.22)	1.16 (0.85-1.59)
		GG	64 (15)	63 (18)	68 (16)	1.17 (0.77-1.78)	0.89 (0.58-1.37)	1.32 (0.86-2.03)
						p-trend=0.4977	p-trend=0.5129	p-trend=0.1785
CADM1	RS10891842	TT	154 (36)	158 (44)	176 (43)
		CT	213 (50)	156 (44)	192 (46)	0.75 (0.55-1.00)	1.10 (0.81-1.50)	0.72 (0.53-0.97)
		CC	58 (14)	42 (12)	46 (11)	0.65 (0.41-1.02)	0.88 (0.54-1.42)	0.71 (0.45-1.12)
						p-trend=0.0239	p-trend=0.8973	p-trend=0.0425
CADM1	RS10891859	GG	308 (72)	262 (74)	321 (77)
		AG	109 (26)	82 (23)	85 (20)	0.72 (0.51-0.99)	0.79 (0.56-1.13)	0.89 (0.64-1.24)
		AA	8 (2)	12 (3)	9 (2)	1.06 (0.40-2.82)	0.56 (0.23-1.38)	1.81 (0.73-4.51)
						p-trend=0.1144	p-trend=0.0894	p-trend=0.8673
CADM1	RS11215407	AA	312 (73)	248 (70)	290 (70)
		AG	104 (24)	97 (27)	119 (29)	1.26 (0.92-1.73)	1.13 (0.82-1.57)	1.17 (0.85-1.62)
		GG	9 (2)	11 (3)	6 (1)	0.84 (0.29-2.45)	0.48 (0.17-1.36)	1.54 (0.63-3.80)
						p-trend=0.2719	p-trend=0.9472	p-trend=0.2029
CADM1	RS11215417	CC	329 (77)	259 (73)	298 (72)
		AC	88 (21)	86 (24)	110 (27)	1.42 (1.02-1.97)	1.27 (0.90-1.78)	1.24 (0.88-1.74)
		AA	8 (2)	11 (3)	5 (1)	0.77 (0.24-2.41)	0.39 (0.13-1.15)	1.77 (0.70-4.47)
						p-trend=0.1090	p-trend=0.8066	p-trend=0.1000
CADM1	RS11215433	TT	245 (58)	184 (52)	221 (53)
		CT	159 (37)	147 (41)	164 (40)	1.16 (0.87-1.55)	0.96 (0.71-1.29)	1.23 (0.91-1.65)
		CC	21 (5)	25 (7)	30 (7)	1.61 (0.89-2.94)	1.04 (0.58-1.86)	1.62 (0.88-3.00)
						p-trend=0.0960	p-trend=0.9157	p-trend=0.0619
CADM1	RS11215437	TT	171 (40)	150 (42)	165 (40)
		CT	199 (47)	159 (45)	179 (43)	0.93 (0.69-1.25)	1.00 (0.73-1.37)	0.92 (0.68-1.24)
		CC	55 (13)	47 (13)	71 (17)	1.39 (0.91-2.11)	1.44 (0.93-2.24)	0.99 (0.63-1.55)
						p-trend=0.2833	p-trend=0.1820	p-trend=0.7947
CADM1	RS11215438	GG	309 (73)	254 (71)	314 (76)
		AG	108 (25)	95 (27)	91 (22)	0.84 (0.61-1.16)	0.76 (0.54-1.07)	1.07 (0.78-1.48)
		AA	8 (2)	7 (2)	9 (2)	1.19 (0.45-3.18)	1.03 (0.37-2.89)	1.08 (0.38-3.01)
						p-trend=0.4928	p-trend=0.2064	p-trend=0.6737
CADM1	RS11215480	AA	187 (44)	171 (48)	213 (51)
		AT	201 (47)	152 (43)	168 (40)	0.71 (0.54-0.95)	0.85 (0.63-1.15)	0.83 (0.62-1.12)
		TT	37 (9)	31 (9)	34 (8)	0.79 (0.47-1.32)	0.78 (0.46-1.34)	0.92 (0.55-1.55)
						p-trend=0.0567	p-trend=0.2289	p-trend=0.3720
CADM1	RS11215504	CC	416 (98)	347 (97)	409 (99)
		CT	8 (2)	9 (3)	6 (1)	0.75 (0.25-2.22)	0.65 (0.22-1.88)	1.35 (0.52-3.55)
		TT	0 ()	0 ()	0 ()	(-)	(-)	(-)
						p-trend=0.6069	p-trend=0.4265	p-trend=0.5381
CADM1	RS11215517	GG	407 (96)	342 (96)	404 (97)
		AG	18 (4)	14 (4)	11 (3)	0.61 (0.28-1.32)	0.66 (0.29-1.51)	0.93 (0.46-1.90)
		AA	0 ()	0 ()	0 ()	(-)	(-)	(-)
						p-trend=0.2103	p-trend=0.3262	p-trend=0.8485
CADM1	RS11608105	CC	412 (97)	343 (96)	403 (97)
		CT	13 (3)	13 (4)	12 (3)	0.83 (0.37-1.86)	0.70 (0.31-1.58)	1.24 (0.57-2.71)
		TT	0 ()	0 ()	0 ()	(-)	(-)	(-)
						p-trend=0.6515	p-trend=0.3934	p-trend=0.5921
CADM1	RS12226198	TT	333 (78)	269 (76)	316 (76)
		CT	87 (20)	81 (23)	95 (23)	1.18 (0.84-1.65)	1.06 (0.75-1.49)	1.16 (0.82-1.63)
		CC	5 (1)	6 (2)	4 (1)	0.99 (0.26-3.81)	0.66 (0.18-2.45)	1.49 (0.45-4.96)
						p-trend=0.3917	p-trend=0.9978	p-trend=0.3073
CADM1	RS12290790	GG	301 (71)	248 (70)	290 (70)
		AG	118 (28)	101 (28)	113 (27)	1.00 (0.73-1.36)	0.96 (0.70-1.33)	1.03 (0.75-1.41)
		AA	6 (1)	7 (2)	12 (3)	2.22 (0.81-6.10)	1.72 (0.65-4.55)	1.43 (0.48-4.33)
						p-trend=0.4422	p-trend=0.7039	p-trend=0.6593
CADM1	RS12295738	TT	304 (72)	263 (74)	309 (75)
		GT	114 (27)	82 (23)	102 (25)	0.85 (0.62-1.17)	1.06 (0.75-1.49)	0.84 (0.60-1.16)
		GG	7 (2)	11 (3)	3 (1)	0.39 (0.10-1.56)	0.22 (0.06-0.81)	1.84 (0.70-4.81)
						p-trend=0.1521	p-trend=0.3532	p-trend=0.8282
CADM1	RS12577709	GG	316 (74)	238 (67)	300 (72)
		GT	98 (23)	102 (29)	104 (25)	1.15 (0.83-1.59)	0.84 (0.61-1.17)	1.37 (0.99-1.89)
		TT	11 (3)	16 (4)	10 (2)	0.88 (0.37-2.13)	0.45 (0.20-1.03)	1.99 (0.90-4.37)
						p-trend=0.6040	p-trend=0.0618	p-trend=0.0158
CADM1	RS17523053	AA	366 (86)	301 (85)	351 (85)
		AC	56 (13)	52 (15)	59 (14)	1.08 (0.73-1.61)	0.98 (0.65-1.48)	1.13 (0.75-1.71)
		CC	3 (1)	3 (1)	5 (1)	1.59 (0.37-6.82)	1.45 (0.33-6.34)	1.25 (0.25-6.24)
						p-trend=0.5293	p-trend=0.8722	p-trend=0.5135
CADM1	RS2027618	GG	329 (77)	286 (80)	342 (82)
		AG	91 (21)	60 (17)	67 (16)	0.67 (0.47-0.96)	0.88 (0.60-1.31)	0.77 (0.53-1.10)
		AA	5 (1)	10 (3)	6 (1)	1.05 (0.31-3.54)	0.48 (0.17-1.36)	2.36 (0.80-7.00)
						p-trend=0.0661	p-trend=0.1980	p-trend=0.7535
CADM1	RS220836	TT	283 (67)	217 (61)	280 (68)
		CT	126 (30)	120 (34)	116 (28)	0.95 (0.70-1.29)	0.78 (0.57-1.08)	1.24 (0.91-1.68)
		CC	16 (4)	19 (5)	18 (4)	1.14 (0.56-2.30)	0.68 (0.34-1.35)	1.56 (0.78-3.11)
						p-trend=0.9832	p-trend=0.0840	p-trend=0.0830
CADM1	RS220838	AA	341 (80)	272 (76)	335 (81)
		AG	79 (19)	77 (22)	74 (18)	0.97 (0.68-1.39)	0.80 (0.55-1.15)	1.23 (0.86-1.74)
		GG	5 (1)	7 (2)	5 (1)	1.01 (0.29-3.59)	0.50 (0.15-1.65)	1.84 (0.58-5.88)
						p-trend=0.9099	p-trend=0.1156	p-trend=0.1454
CADM1	RS220843	TT	299 (70)	230 (65)	291 (70)
		CT	110 (26)	111 (31)	109 (26)	1.04 (0.76-1.42)	0.83 (0.60-1.15)	1.31 (0.95-1.79)
		CC	16 (4)	15 (4)	15 (4)	0.85 (0.41-1.78)	0.68 (0.32-1.44)	1.26 (0.61-2.61)
						p-trend=0.9231	p-trend=0.1585	p-trend=0.1133
CADM1	RS2255566	GG	334 (79)	271 (76)	329 (79)
		AG	88 (21)	79 (22)	81 (20)	0.95 (0.67-1.34)	0.87 (0.61-1.25)	1.11 (0.78-1.56)
		AA	3 (1)	6 (2)	4 (1)	1.19 (0.26-5.46)	0.49 (0.13-1.78)	2.52 (0.62-10.20)
						p-trend=0.8512	p-trend=0.2526	p-trend=0.2832
CADM1	RS2269737	AA	186 (44)	161 (45)	181 (44)
		AC	196 (46)	153 (43)	179 (43)	0.95 (0.71-1.27)	1.03 (0.75-1.40)	0.90 (0.66-1.21)
		CC	43 (10)	42 (12)	54 (13)	1.33 (0.84-2.10)	1.21 (0.76-1.94)	1.16 (0.72-1.87)
						p-trend=0.4445	p-trend=0.4824	p-trend=0.9201
CADM1	RS2366914	CC	174 (41)	128 (36)	197 (48)
		CT	210 (49)	173 (49)	175 (42)	0.72 (0.54-0.97)	0.66 (0.48-0.90)	1.13 (0.83-1.53)
		TT	41 (10)	55 (15)	42 (10)	0.87 (0.54-1.42)	0.47 (0.30-0.76)	1.85 (1.16-2.95)
						p-trend=0.1325	p-trend=0.0005	p-trend=0.0205
CADM1	RS314494	TT	343 (81)	279 (78)	332 (81)
		CT	76 (18)	70 (20)	74 (18)	1.03 (0.72-1.47)	0.90 (0.62-1.31)	1.13 (0.79-1.63)
		CC	4 (1)	7 (2)	4 (1)	1.11 (0.27-4.58)	0.42 (0.12-1.50)	2.24 (0.65-7.75)
						p-trend=0.8446	p-trend=0.2640	p-trend=0.2278
CADM1	RS314517	CC	396 (93)	318 (89)	389 (94)
		CT	28 (7)	38 (11)	26 (6)	1.02 (0.58-1.78)	0.62 (0.36-1.06)	1.68 (1.01-2.80)
		TT	1 (0)	0 ()	0 (0)	0.00 (0.00-I)	(-)	0.00 (0.00-I)
						p-trend=0.8891	p-trend=0.0792	p-trend=0.0886
CADM1	RS3802857	GG	115 (27)	94 (26)	118 (29)
		CG	215 (51)	176 (49)	200 (48)	0.86 (0.62-1.19)	0.87 (0.61-1.23)	1.00 (0.71-1.40)
		CC	95 (22)	86 (24)	95 (23)	0.94 (0.64-1.39)	0.85 (0.56-1.27)	1.10 (0.74-1.64)
						p-trend=0.7286	p-trend=0.4099	p-trend=0.6436
CADM1	RS4445669	TT	191 (45)	156 (44)	166 (40)
		CT	172 (40)	152 (43)	201 (49)	1.27 (0.95-1.71)	1.26 (0.92-1.72)	1.08 (0.80-1.47)
		CC	62 (15)	48 (13)	46 (11)	0.83 (0.53-1.28)	0.87 (0.54-1.39)	0.95 (0.62-1.47)
						p-trend=0.9995	p-trend=0.8616	p-trend=0.9845
CADM1	RS4938184	TT	242 (57)	187 (53)	234 (56)
		CT	155 (36)	144 (40)	165 (40)	1.16 (0.87-1.54)	0.96 (0.71-1.30)	1.20 (0.89-1.61)
		CC	28 (7)	25 (7)	16 (4)	0.60 (0.32-1.15)	0.52 (0.27-1.02)	1.16 (0.65-2.05)
						p-trend=0.7975	p-trend=0.1741	p-trend=0.2838
CADM1	RS6589484	AA	375 (88)	310 (87)	358 (86)
		AG	48 (11)	44 (12)	56 (13)	1.26 (0.83-1.91)	1.09 (0.71-1.69)	1.11 (0.72-1.72)
		GG	2 (0)	2 (1)	1 (0)	0.38 (0.03-4.18)	0.38 (0.03-4.43)	1.29 (0.18-9.24)
						p-trend=0.4564	p-trend=0.9074	p-trend=0.6010
CADM1	RS6589490	AA	112 (26)	112 (31)	114 (28)
		AG	223 (52)	172 (48)	208 (50)	0.89 (0.64-1.24)	1.13 (0.80-1.58)	0.77 (0.55-1.07)
		GG	90 (21)	72 (20)	92 (22)	1.02 (0.69-1.52)	1.27 (0.84-1.92)	0.79 (0.53-1.20)
						p-trend=0.9651	p-trend=0.2571	p-trend=0.2179
CADM1	RS7101437	GG	175 (41)	145 (41)	161 (39)
		AG	187 (44)	159 (45)	199 (48)	1.10 (0.82-1.48)	1.15 (0.84-1.57)	1.02 (0.75-1.39)
		AA	63 (15)	52 (15)	53 (13)	0.90 (0.58-1.38)	0.89 (0.56-1.40)	0.99 (0.65-1.52)
						p-trend=0.8812	p-trend=0.9518	p-trend=0.9762
CADM1	RS7101558	AA	327 (77)	275 (77)	333 (80)
		AG	94 (22)	75 (21)	77 (19)	0.84 (0.59-1.18)	0.88 (0.61-1.26)	0.94 (0.67-1.33)
		GG	4 (1)	6 (2)	5 (1)	1.21 (0.32-4.63)	0.64 (0.19-2.17)	1.74 (0.49-6.26)
						p-trend=0.4285	p-trend=0.3463	p-trend=0.9406
CADM1	RS7105871	TT	275 (65)	207 (58)	281 (68)
		CT	130 (31)	130 (37)	117 (28)	0.90 (0.67-1.22)	0.70 (0.51-0.97)	1.32 (0.98-1.79)
		CC	20 (5)	19 (5)	15 (4)	0.67 (0.33-1.34)	0.52 (0.26-1.07)	1.30 (0.68-2.51)
						p-trend=0.2435	p-trend=0.0086	p-trend=0.0829
CADM1	RS7931895	TT	246 (58)	206 (58)	250 (60)
		GT	155 (36)	121 (34)	145 (35)	0.91 (0.68-1.21)	0.96 (0.70-1.31)	0.93 (0.69-1.25)
		GG	24 (6)	29 (8)	19 (5)	0.75 (0.40-1.43)	0.53 (0.28-0.98)	1.44 (0.81-2.54)
						p-trend=0.3188	p-trend=0.1314	p-trend=0.5941
CADM1	RS7943417	CC	183 (43)	141 (40)	202 (49)
		CT	197 (46)	163 (46)	171 (41)	0.77 (0.57-1.03)	0.74 (0.54-1.01)	1.08 (0.80-1.46)
		TT	44 (10)	52 (15)	41 (10)	0.78 (0.49-1.26)	0.52 (0.33-0.84)	1.56 (0.99-2.48)
						p-trend=0.1058	p-trend=0.0038	p-trend=0.0938
CADM1	RS7947456	CC	295 (69)	248 (70)	310 (75)
		CT	118 (28)	96 (27)	94 (23)	0.71 (0.52-0.98)	0.73 (0.52-1.03)	0.98 (0.71-1.35)
		TT	12 (3)	12 (3)	11 (3)	0.78 (0.33-1.83)	0.64 (0.27-1.51)	1.22 (0.54-2.78)
						p-trend=0.0515	p-trend=0.0525	p-trend=0.8631
CADM1	RS7949084	AA	220 (52)	208 (59)	239 (58)
		AC	178 (42)	126 (35)	150 (36)	0.75 (0.57-1.01)	0.96 (0.71-1.31)	0.76 (0.56-1.02)
		CC	27 (6)	21 (6)	23 (6)	0.76 (0.42-1.37)	0.86 (0.45-1.61)	0.84 (0.46-1.53)
						p-trend=0.0667	p-trend=0.6438	p-trend=0.1179
CADM1	RS7950069	GG	166 (39)	126 (35)	159 (38)
		AG	209 (49)	175 (49)	200 (48)	0.99 (0.73-1.33)	0.90 (0.66-1.24)	1.10 (0.81-1.50)
		AA	50 (12)	55 (15)	56 (13)	1.24 (0.79-1.94)	0.82 (0.52-1.29)	1.45 (0.93-2.28)
						p-trend=0.4943	p-trend=0.3572	p-trend=0.1288
CADM1	RS881210	CC	130 (31)	131 (37)	131 (32)
		CG	218 (51)	164 (46)	205 (50)	0.92 (0.67-1.26)	1.17 (0.84-1.62)	0.75 (0.54-1.03)
		GG	76 (18)	59 (17)	77 (19)	1.00 (0.67-1.50)	1.31 (0.85-2.01)	0.77 (0.51-1.18)
						p-trend=0.9048	p-trend=0.1918	p-trend=0.1356
CADM1	RS988873	TT	177 (42)	166 (47)	167 (40)
		CT	203 (48)	159 (45)	189 (46)	0.99 (0.74-1.33)	1.22 (0.90-1.66)	0.83 (0.62-1.12)
		CC	45 (11)	31 (9)	59 (14)	1.39 (0.89-2.17)	1.93 (1.17-3.17)	0.75 (0.45-1.24)
						p-trend=0.2783	p-trend=0.0109	p-trend=0.1493
CAMP	RS11130161	GG	346 (81)	275 (77)	329 (79)
		AG	72 (17)	76 (21)	80 (19)	1.24 (0.86-1.77)	0.88 (0.62-1.27)	1.34 (0.93-1.92)
		AA	7 (2)	5 (1)	6 (1)	0.87 (0.28-2.64)	0.92 (0.27-3.15)	0.92 (0.29-2.93)
						p-trend=0.4004	p-trend=0.5243	p-trend=0.2063
CAMP	RS6806112	AA	182 (43)	150 (42)	190 (46)
		AT	184 (43)	168 (47)	176 (43)	0.93 (0.69-1.25)	0.85 (0.62-1.15)	1.11 (0.82-1.51)
		TT	58 (14)	38 (11)	46 (11)	0.77 (0.49-1.19)	0.93 (0.57-1.51)	0.80 (0.50-1.27)
						p-trend=0.2603	p-trend=0.4668	p-trend=0.6685
CAMP	RS9844812	GG	393 (92)	340 (96)	389 (94)
		AG	32 (8)	16 (4)	26 (6)	0.82 (0.47-1.41)	1.52 (0.79-2.93)	0.57 (0.31-1.07)
		AA	0 ()	0 ()	0 ()	(-)	(-)	(-)
						p-trend=0.4667	p-trend=0.2071	p-trend=0.0784
CASP10	RS10188598	AA	200 (50)	188 (56)	209 (53)
		AG	198 (50)	149 (44)	187 (47)	0.91 (0.68-1.20)	1.13 (0.84-1.53)	0.79 (0.59-1.05)
		GG	0 ()	0 ()	0 ()	(-)	(-)	(-)
						p-trend=0.4957	p-trend=0.4173	p-trend=0.1082
CASP10	RS11674246	CC	184 (43)	179 (50)	192 (47)
		CT	196 (46)	137 (39)	186 (45)	0.92 (0.69-1.23)	1.25 (0.92-1.71)	0.71 (0.52-0.96)
		TT	45 (11)	39 (11)	34 (8)	0.75 (0.46-1.23)	0.81 (0.49-1.36)	0.89 (0.55-1.43)
						p-trend=0.2639	p-trend=0.8448	p-trend=0.1486
CASP10	RS11900753	GG	376 (88)	310 (87)	354 (85)
		AG	49 (12)	45 (13)	60 (14)	1.28 (0.85-1.93)	1.17 (0.77-1.79)	1.12 (0.73-1.73)
		AA	0 (0)	1 (0)	1 (0)	152453 (0.00-I)	0.56 (0.03-9.03)	276698 (0.00-I)
						p-trend=0.1863	p-trend=0.5530	p-trend=0.4544
CASP10	RS13034255	GG	177 (42)	178 (50)	183 (44)
		AG	202 (48)	136 (38)	188 (46)	0.91 (0.68-1.22)	1.32 (0.97-1.80)	0.66 (0.49-0.89)
		AA	46 (11)	42 (12)	42 (10)	0.91 (0.57-1.47)	0.98 (0.60-1.59)	0.90 (0.57-1.44)
						p-trend=0.5718	p-trend=0.4350	p-trend=0.1151
CASP10	RS16836813	CC	410 (96)	346 (97)	394 (95)
		CT	15 (4)	10 (3)	21 (5)	1.46 (0.74-2.90)	1.76 (0.81-3.86)	0.79 (0.35-1.78)
		TT	0 ()	0 ()	0 ()	(-)	(-)	(-)
						p-trend=0.2790	p-trend=0.1542	p-trend=0.5652
CASP10	RS3731714	CC	278 (65)	236 (66)	297 (72)
		CT	135 (32)	113 (32)	103 (25)	0.73 (0.54-1.00)	0.75 (0.54-1.04)	0.97 (0.72-1.32)
		TT	12 (3)	7 (2)	14 (3)	1.22 (0.55-2.73)	1.79 (0.69-4.61)	0.65 (0.25-1.69)
						p-trend=0.2109	p-trend=0.4714	p-trend=0.5562
CASP10	RS7558475	AA	324 (76)	266 (75)	323 (78)
		AG	94 (22)	83 (23)	82 (20)	0.87 (0.62-1.22)	0.79 (0.55-1.12)	1.08 (0.77-1.51)
		GG	7 (2)	7 (2)	9 (2)	1.31 (0.47-3.61)	1.00 (0.36-2.76)	1.21 (0.42-3.50)
						p-trend=0.6941	p-trend=0.2829	p-trend=0.5927
CASP10	RS7591912	CC	416 (98)	344 (97)	399 (96)
		CT	9 (2)	12 (3)	16 (4)	1.85 (0.80-4.28)	1.12 (0.51-2.43)	1.63 (0.68-3.93)
		TT	0 ()	0 ()	0 ()	(-)	(-)	(-)
						p-trend=0.1522	p-trend=0.7830	p-trend=0.2727
CASP10	RS7608787	GG	390 (92)	320 (90)	383 (92)
		GT	35 (8)	35 (10)	32 (8)	0.88 (0.53-1.45)	0.75 (0.45-1.26)	1.24 (0.76-2.03)
		TT	0 ()	1 (0)	0 ()	(-)	0.00 (0.00-I)	279171 (0.00-I)
						p-trend=0.6075	p-trend=0.1751	p-trend=0.2687
CASP2	RS10500136	TT	308 (72)	273 (77)	285 (69)
		CT	107 (25)	79 (22)	120 (29)	1.17 (0.86-1.59)	1.40 (1.00-1.96)	0.83 (0.59-1.16)
		CC	10 (2)	4 (1)	10 (2)	1.10 (0.44-2.71)	2.33 (0.71-7.67)	0.46 (0.14-1.48)
						p-trend=0.3711	p-trend=0.0211	p-trend=0.1161
CASP2	RS3181165	GG	410 (96)	343 (96)	399 (96)
		AG	15 (4)	12 (3)	16 (4)	1.15 (0.56-2.39)	1.15 (0.52-2.51)	0.93 (0.43-2.02)
		AA	0 ()	1 (0)	0 ()	(-)	0.00 (0.00-I)	272167 (0.00-I)
						p-trend=0.7028	p-trend=0.8822	p-trend=0.8062
CASP2	RS3181166	TT	378 (89)	319 (90)	367 (88)
		GT	45 (11)	35 (10)	48 (12)	1.15 (0.74-1.78)	1.27 (0.79-2.03)	0.91 (0.57-1.46)
		GG	2 (0)	2 (1)	0 (0)	0.00 (0.00-I)	0.00 (0.00-I)	1.23 (0.17-8.78)
						p-trend=0.8607	p-trend=0.6541	p-trend=0.7986
CASP2	RS4647311	GG	388 (91)	327 (92)	385 (93)
		AG	36 (8)	25 (7)	30 (7)	0.85 (0.51-1.41)	1.01 (0.57-1.78)	0.81 (0.47-1.38)
		AA	1 (0)	4 (1)	0 (0)	0.00 (0.00-I)	0.00 (0.00-I)	4.79 (0.53-43.13)
						p-trend=0.4028	p-trend=0.3053	p-trend=0.9225
CASP2	RS4647321	TT	365 (86)	307 (86)	361 (87)
		CT	57 (13)	49 (14)	52 (13)	0.92 (0.61-1.38)	0.94 (0.61-1.44)	1.02 (0.68-1.54)
		CC	3 (1)	0 (0)	2 (0)	0.74 (0.12-4.61)	551629 (0.00-I)	0.00 (0.00-I)
						p-trend=0.6128	p-trend=0.9110	p-trend=0.6736
CASP2	RS7806162	CC	325 (76)	277 (78)	323 (78)
		AC	93 (22)	76 (21)	83 (20)	0.90 (0.64-1.26)	0.95 (0.66-1.36)	0.97 (0.69-1.37)
		AA	7 (2)	3 (1)	8 (2)	1.14 (0.40-3.21)	1.76 (0.45-6.86)	0.51 (0.13-1.99)
						p-trend=0.6815	p-trend=0.8931	p-trend=0.5567
CASP2	RS7810486	GG	210 (49)	188 (53)	198 (48)
		AG	169 (40)	143 (40)	180 (43)	1.10 (0.82-1.47)	1.14 (0.84-1.55)	0.94 (0.70-1.26)
		AA	46 (11)	25 (7)	37 (9)	0.84 (0.52-1.37)	1.42 (0.81-2.47)	0.60 (0.35-1.02)
						p-trend=0.8679	p-trend=0.1798	p-trend=0.1118
CASP3	RS10015218	TT	347 (82)	296 (83)	332 (80)
		CT	73 (17)	58 (16)	82 (20)	1.20 (0.84-1.72)	1.24 (0.84-1.81)	0.93 (0.64-1.37)
		CC	5 (1)	2 (1)	1 (0)	0.17 (0.02-1.52)	0.39 (0.03-4.56)	0.49 (0.09-2.53)
						p-trend=0.7842	p-trend=0.4111	p-trend=0.4977
CASP3	RS12108497	CC	113 (27)	108 (30)	112 (27)
		CT	217 (51)	175 (49)	200 (48)	0.95 (0.69-1.32)	1.08 (0.77-1.52)	0.83 (0.60-1.16)
		TT	95 (22)	73 (21)	102 (25)	1.02 (0.69-1.51)	1.26 (0.84-1.90)	0.81 (0.54-1.22)
						p-trend=0.9206	p-trend=0.2708	p-trend=0.2833
CASP3	RS12507711	CC	334 (79)	281 (79)	317 (76)
		CT	84 (20)	73 (21)	91 (22)	1.13 (0.80-1.58)	1.04 (0.73-1.49)	1.03 (0.72-1.47)
		TT	7 (2)	2 (1)	7 (2)	1.11 (0.38-3.26)	2.67 (0.54-13.29)	0.33 (0.07-1.60)
						p-trend=0.5037	p-trend=0.4713	p-trend=0.6330
CASP3	RS13435690	AA	207 (49)	167 (47)	212 (51)
		AC	176 (42)	155 (44)	157 (38)	0.88 (0.66-1.18)	0.85 (0.63-1.16)	1.10 (0.82-1.48)
		CC	41 (10)	34 (10)	44 (11)	1.08 (0.67-1.73)	1.11 (0.67-1.84)	1.03 (0.62-1.70)
						p-trend=0.8412	p-trend=0.8281	p-trend=0.6897
CASP3	RS1569106	GG	408 (96)	338 (95)	384 (93)
		GT	16 (4)	18 (5)	31 (7)	2.28 (1.21-4.30)	1.68 (0.91-3.12)	1.32 (0.66-2.64)
		TT	1 (0)	0 ()	0 (0)	0.00 (0.00-I)	(-)	0.00 (0.00-I)
						p-trend=0.0287	p-trend=0.0979	p-trend=0.6597
CASP3	RS2019978	AA	322 (76)	269 (76)	317 (76)
		AC	91 (21)	81 (23)	91 (22)	1.06 (0.76-1.48)	0.93 (0.65-1.32)	1.06 (0.75-1.49)
		CC	12 (3)	6 (2)	7 (2)	0.57 (0.22-1.49)	0.81 (0.27-2.50)	0.60 (0.22-1.63)
						p-trend=0.7229	p-trend=0.5967	p-trend=0.7828
CASP3	RS2463447	GG	398 (94)	331 (93)	387 (93)
		AG	27 (6)	25 (7)	26 (6)	0.96 (0.54-1.68)	0.84 (0.47-1.50)	1.10 (0.63-1.94)
		AA	0 (0)	0 (0)	2 (0)	797670 (0.00-I)	722612 (0.00-I)	(-)
						p-trend=0.6362	p-trend=0.9629	p-trend=0.7290
CASP3	RS2720378	GG	126 (30)	101 (28)	132 (32)
		CG	211 (50)	174 (49)	188 (46)	0.87 (0.63-1.20)	0.83 (0.59-1.17)	1.02 (0.73-1.42)
		CC	88 (21)	81 (23)	93 (23)	1.05 (0.71-1.54)	0.91 (0.61-1.36)	1.14 (0.77-1.71)
						p-trend=0.9208	p-trend=0.5816	p-trend=0.5280
CASP3	RS2720380	AA	160 (38)	146 (41)	153 (37)
		AT	202 (48)	161 (45)	202 (49)	1.04 (0.77-1.40)	1.16 (0.85-1.59)	0.87 (0.64-1.18)
		TT	61 (14)	47 (13)	59 (14)	0.95 (0.62-1.46)	1.12 (0.71-1.76)	0.86 (0.55-1.34)
						p-trend=0.9217	p-trend=0.4629	p-trend=0.3734
CASP3	RS4440267	GG	413 (97)	341 (96)	406 (98)
		AG	12 (3)	15 (4)	9 (2)	0.82 (0.34-2.00)	0.54 (0.23-1.27)	1.47 (0.68-3.20)
		AA	0 ()	0 ()	0 ()	(-)	(-)	(-)
						p-trend=0.6638	p-trend=0.1574	p-trend=0.3267
CASP3	RS4647606	TT	425 (100)	350 (98)	410 (99)
		CT	0 (0)	6 (2)	5 (1)	1235510 (0.00-I)	0.66 (0.19-2.23)	1796135 (0.00-I)
		CC	0 ()	0 ()	0 ()	(-)	(-)	(-)
						p-trend=0.9793	p-trend=0.4986	p-trend=0.9769
CASP3	RS4647607	TT	424 (100)	354 (99)	409 (99)
		GT	1 (0)	2 (1)	6 (1)	7.87 (0.92-67.50)	2.88 (0.55-14.95)	2.37 (0.21-26.31)
		GG	0 ()	0 ()	0 ()	(-)	(-)	(-)
						p-trend=0.0600	p-trend=0.2082	p-trend=0.4821
CASP3	RS4647614	TT	388 (91)	316 (89)	380 (92)
		CT	36 (8)	38 (11)	32 (8)	0.89 (0.53-1.47)	0.65 (0.39-1.08)	1.29 (0.80-2.08)
		CC	1 (0)	2 (1)	3 (1)	3.95 (0.40-39.13)	1.63 (0.26-10.12)	2.26 (0.20-25.16)
						p-trend=0.9024	p-trend=0.2366	p-trend=0.2300
CASP3	RS4647641	TT	396 (93)	341 (96)	387 (93)
		GT	29 (7)	15 (4)	28 (7)	0.94 (0.55-1.63)	1.61 (0.83-3.10)	0.61 (0.32-1.16)
		GG	0 ()	0 ()	0 ()	(-)	(-)	(-)
						p-trend=0.8300	p-trend=0.1578	p-trend=0.1334
CASP3	RS4647693	CC	133 (31)	98 (28)	129 (31)
		CT	202 (48)	180 (51)	193 (47)	1.03 (0.75-1.42)	0.84 (0.60-1.18)	1.20 (0.86-1.67)
		TT	90 (21)	78 (22)	92 (22)	1.08 (0.74-1.59)	0.96 (0.63-1.44)	1.17 (0.79-1.75)
						p-trend=0.6987	p-trend=0.7480	p-trend=0.3835
CASP3	RS4862396	TT	289 (68)	254 (71)	281 (68)
		CT	129 (30)	92 (26)	121 (29)	0.94 (0.70-1.28)	1.13 (0.82-1.57)	0.81 (0.59-1.11)
		CC	7 (2)	10 (3)	13 (3)	1.98 (0.76-5.15)	1.18 (0.50-2.80)	1.61 (0.61-4.31)
						p-trend=0.6857	p-trend=0.4251	p-trend=0.5425
CASP3	RS4862401	GG	106 (25)	82 (23)	120 (29)
		CG	219 (52)	184 (52)	204 (50)	0.82 (0.59-1.14)	0.75 (0.53-1.07)	1.07 (0.75-1.51)
		CC	100 (24)	90 (25)	88 (21)	0.81 (0.55-1.20)	0.70 (0.46-1.07)	1.16 (0.77-1.73)
						p-trend=0.2777	p-trend=0.0914	p-trend=0.4858
CASP3	RS870824	AA	407 (96)	337 (95)	384 (93)
		AG	17 (4)	19 (5)	31 (7)	2.11 (1.13-3.94)	1.59 (0.87-2.91)	1.32 (0.67-2.58)
		GG	1 (0)	0 ()	0 (0)	0.00 (0.00-I)	(-)	0.00 (0.00-I)
						p-trend=0.0446	p-trend=0.1345	p-trend=0.6428
CASP3	RS871254	GG	349 (82)	298 (84)	335 (81)
		CG	73 (17)	56 (16)	79 (19)	1.14 (0.80-1.63)	1.23 (0.84-1.81)	0.90 (0.61-1.32)
		CC	3 (1)	2 (1)	1 (0)	0.32 (0.03-3.10)	0.39 (0.03-4.55)	0.79 (0.13-4.74)
						p-trend=0.7138	p-trend=0.4262	p-trend=0.5539
CASP3	RS9685847	CC	182 (43)	136 (38)	177 (43)
		CG	192 (45)	168 (47)	174 (42)	0.96 (0.71-1.29)	0.85 (0.62-1.17)	1.17 (0.86-1.59)
		GG	51 (12)	52 (15)	62 (15)	1.25 (0.81-1.93)	0.97 (0.62-1.50)	1.37 (0.87-2.14)
						p-trend=0.4886	p-trend=0.6329	p-trend=0.1398
CASP3	RS9992401	GG	395 (93)	327 (92)	373 (90)
		AG	28 (7)	29 (8)	41 (10)	1.73 (1.03-2.90)	1.41 (0.84-2.35)	1.23 (0.71-2.11)
		AA	2 (0)	0 (0)	1 (0)	0.45 (0.04-5.01)	113995 (0.00-I)	0.00 (0.00-I)
						p-trend=0.0991	p-trend=0.1495	p-trend=0.8085
CASP6	RS1053680	AA	392 (97)	326 (97)	381 (96)
		AG	11 (3)	10 (3)	17 (4)	1.98 (0.90-4.36)	1.58 (0.70-3.56)	1.07 (0.45-2.56)
		GG	0 ()	0 ()	0 ()	(-)	(-)	(-)
						p-trend=0.0907	p-trend=0.2708	p-trend=0.8818
CASP6	RS12498588	AA	179 (42)	142 (40)	179 (43)
		AT	194 (46)	170 (48)	183 (44)	0.93 (0.70-1.25)	0.89 (0.65-1.22)	1.10 (0.81-1.49)
		TT	52 (12)	44 (12)	53 (13)	1.01 (0.65-1.57)	0.93 (0.58-1.48)	1.05 (0.66-1.66)
						p-trend=0.8714	p-trend=0.5945	p-trend=0.6718
CASP6	RS13151303	TT	181 (43)	144 (40)	179 (43)
		CT	193 (45)	169 (47)	187 (45)	0.98 (0.73-1.31)	0.94 (0.69-1.28)	1.09 (0.81-1.48)
		CC	51 (12)	43 (12)	48 (12)	0.95 (0.61-1.49)	0.88 (0.55-1.42)	1.04 (0.66-1.66)
						p-trend=0.8130	p-trend=0.5690	p-trend=0.6979
CASP6	RS13846	AA	191 (45)	164 (46)	185 (45)
		AT	189 (44)	156 (44)	181 (44)	0.97 (0.72-1.29)	1.00 (0.73-1.36)	0.97 (0.72-1.31)
		TT	45 (11)	36 (10)	49 (12)	1.12 (0.71-1.77)	1.17 (0.72-1.91)	0.93 (0.57-1.51)
						p-trend=0.7967	p-trend=0.6394	p-trend=0.7569
CASP6	RS1541373	TT	160 (38)	147 (41)	173 (42)
		CT	211 (50)	159 (45)	180 (43)	0.79 (0.59-1.07)	0.97 (0.71-1.33)	0.82 (0.60-1.11)
		CC	54 (13)	50 (14)	62 (15)	1.08 (0.70-1.66)	1.04 (0.67-1.63)	0.99 (0.64-1.55)
						p-trend=0.7673	p-trend=0.9336	p-trend=0.5896
CASP6	RS1800627	AA	114 (27)	108 (30)	118 (28)
		AG	220 (52)	178 (50)	191 (46)	0.84 (0.60-1.16)	0.93 (0.66-1.30)	0.86 (0.62-1.20)
		GG	91 (21)	70 (20)	106 (26)	1.13 (0.77-1.66)	1.32 (0.88-1.99)	0.81 (0.54-1.22)
						p-trend=0.6051	p-trend=0.2238	p-trend=0.2927
CASP6	RS2285712	CC	154 (36)	123 (35)	152 (37)
		CT	208 (49)	181 (51)	191 (46)	0.93 (0.69-1.25)	0.91 (0.66-1.26)	1.08 (0.79-1.48)
		TT	63 (15)	52 (15)	72 (17)	1.17 (0.78-1.77)	1.13 (0.73-1.75)	1.02 (0.66-1.58)
						p-trend=0.6297	p-trend=0.7777	p-trend=0.8181
CASP6	RS3181345	CC	384 (90)	318 (89)	377 (91)
		CT	38 (9)	37 (10)	37 (9)	1.00 (0.62-1.63)	0.83 (0.51-1.36)	1.20 (0.74-1.93)
		TT	3 (1)	1 (0)	1 (0)	0.41 (0.04-4.08)	1.28 (0.08-20.98)	0.39 (0.04-3.82)
						p-trend=0.7569	p-trend=0.5274	p-trend=0.7564
CASP6	RS3733611	CC	185 (44)	152 (43)	185 (45)
		CT	189 (44)	165 (46)	181 (44)	0.95 (0.71-1.27)	0.95 (0.70-1.29)	1.06 (0.78-1.42)
		TT	51 (12)	39 (11)	49 (12)	0.96 (0.61-1.50)	1.00 (0.62-1.62)	0.92 (0.57-1.47)
						p-trend=0.7761	p-trend=0.8739	p-trend=0.9153
CASP6	RS4698780	GG	183 (43)	151 (42)	187 (45)
		GT	191 (45)	165 (46)	179 (44)	0.91 (0.68-1.22)	0.92 (0.68-1.26)	1.04 (0.77-1.40)
		TT	50 (12)	40 (11)	45 (11)	0.88 (0.56-1.40)	0.88 (0.54-1.44)	0.96 (0.60-1.53)
						p-trend=0.4898	p-trend=0.5438	p-trend=0.9876
CASP6	RS5030535	TT	171 (40)	150 (42)	181 (44)
		CT	202 (48)	158 (45)	178 (43)	0.84 (0.63-1.13)	0.96 (0.70-1.31)	0.89 (0.65-1.20)
		CC	52 (12)	47 (13)	55 (13)	1.02 (0.66-1.58)	0.97 (0.61-1.52)	1.02 (0.65-1.60)
						p-trend=0.6742	p-trend=0.8255	p-trend=0.7839
CASP6	RS5030539	GG	139 (33)	124 (35)	145 (35)
		AG	215 (51)	170 (48)	187 (45)	0.84 (0.62-1.15)	0.97 (0.70-1.34)	0.88 (0.64-1.21)
		AA	71 (17)	62 (17)	83 (20)	1.12 (0.75-1.67)	1.14 (0.75-1.72)	0.97 (0.64-1.47)
						p-trend=0.8217	p-trend=0.6323	p-trend=0.7396
CASP6	RS5030551	GG	418 (98)	352 (99)	408 (98)
		AG	7 (2)	4 (1)	7 (2)	1.23 (0.42-3.61)	1.53 (0.43-5.42)	0.63 (0.18-2.17)
		AA	0 ()	0 ()	0 ()	(-)	(-)	(-)
						p-trend=0.7064	p-trend=0.5073	p-trend=0.4602
CASP6	RS5030552	TT	370 (87)	302 (85)	369 (89)
		CT	51 (12)	52 (15)	44 (11)	0.92 (0.59-1.42)	0.69 (0.44-1.07)	1.25 (0.82-1.89)
		CC	4 (1)	2 (1)	2 (0)	0.51 (0.09-2.88)	0.62 (0.08-4.51)	0.60 (0.11-3.33)
						p-trend=0.4941	p-trend=0.0909	p-trend=0.4996
CASP6	RS5030567	CC	407 (96)	340 (96)	395 (95)
		AC	17 (4)	16 (4)	20 (5)	1.20 (0.61-2.34)	1.12 (0.56-2.23)	1.15 (0.57-2.31)
		AA	1 (0)	0 ()	0 (0)	0.00 (0.00-I)	(-)	0.00 (0.00-I)
						p-trend=0.8911	p-trend=0.7533	p-trend=0.9300
CASP6	RS5030570	CC	406 (96)	347 (97)	400 (96)
		CT	17 (4)	9 (3)	15 (4)	0.85 (0.41-1.73)	1.55 (0.66-3.66)	0.62 (0.27-1.42)
		TT	1 (0)	0 ()	0 (0)	0.00 (0.00-I)	(-)	0.00 (0.00-I)
						p-trend=0.4135	p-trend=0.3162	p-trend=0.1763
CASP6	RS5030587	AA	424 (100)	352 (99)	410 (99)
		AG	1 (0)	4 (1)	5 (1)	6.54 (0.74-57.54)	1.02 (0.26-3.95)	5.03 (0.56-45.37)
		GG	0 ()	0 ()	0 ()	(-)	(-)	(-)
						p-trend=0.0907	p-trend=0.9789	p-trend=0.1497
CASP6	RS5030593	TT	425 (100)	350 (98)	411 (99)
		AT	0 (0)	6 (2)	4 (1)	1441056 (0.00-I)	0.58 (0.16-2.12)	1796135 (0.00-I)
		AA	0 ()	0 ()	0 ()	(-)	(-)	(-)
						p-trend=0.9812	p-trend=0.4084	p-trend=0.9769
CASP6	RS5030606	AA	148 (35)	116 (33)	150 (36)
		AG	204 (48)	180 (51)	195 (47)	0.94 (0.70-1.28)	0.86 (0.62-1.20)	1.13 (0.82-1.54)
		GG	73 (17)	60 (17)	68 (16)	0.93 (0.62-1.39)	0.87 (0.57-1.35)	1.04 (0.68-1.58)
						p-trend=0.6759	p-trend=0.4423	p-trend=0.7288
CASP6	RS739733	AA	376 (88)	315 (88)	374 (90)
		AG	49 (12)	41 (12)	41 (10)	0.88 (0.56-1.37)	0.88 (0.55-1.40)	1.00 (0.64-1.55)
		GG	0 ()	0 ()	0 ()	(-)	(-)	(-)
						p-trend=0.5669	p-trend=0.5773	p-trend=0.9886
CASP6	RS7659831	CC	405 (95)	344 (97)	401 (97)
		CT	20 (5)	12 (3)	14 (3)	0.74 (0.36-1.50)	1.06 (0.47-2.37)	0.70 (0.34-1.46)
		TT	0 ()	0 ()	0 ()	(-)	(-)	(-)
						p-trend=0.3993	p-trend=0.8886	p-trend=0.3467
CASP6	RS768063	CC	406 (96)	338 (95)	401 (97)
		CT	19 (4)	18 (5)	14 (3)	0.72 (0.35-1.47)	0.72 (0.35-1.51)	1.13 (0.58-2.20)
		TT	0 ()	0 ()	0 ()	(-)	(-)	(-)
						p-trend=0.3697	p-trend=0.3889	p-trend=0.7101
CASP7	RS10749143	CC	144 (34)	114 (32)	132 (32)
		CT	202 (48)	171 (48)	210 (51)	1.12 (0.82-1.53)	1.11 (0.79-1.54)	1.07 (0.78-1.48)
		TT	78 (18)	71 (20)	73 (18)	1.04 (0.69-1.56)	0.92 (0.61-1.41)	1.15 (0.77-1.72)
						p-trend=0.7370	p-trend=0.8374	p-trend=0.4913
CASP7	RS10787498	GG	137 (32)	110 (31)	135 (33)
		GT	205 (48)	170 (48)	196 (47)	0.96 (0.70-1.31)	0.91 (0.65-1.28)	1.04 (0.75-1.44)
		TT	83 (20)	76 (21)	84 (20)	1.00 (0.67-1.47)	0.82 (0.54-1.24)	1.14 (0.76-1.70)
						p-trend=0.9422	p-trend=0.3429	p-trend=0.5396
CASP7	RS10885491	CC	328 (77)	289 (81)	327 (79)
		CT	90 (21)	61 (17)	79 (19)	0.92 (0.65-1.30)	1.22 (0.83-1.78)	0.77 (0.54-1.11)
		TT	7 (2)	6 (2)	9 (2)	1.41 (0.51-3.89)	1.40 (0.48-4.06)	0.95 (0.32-2.87)
						p-trend=0.9722	p-trend=0.2462	p-trend=0.2270
CASP7	RS1112572	AA	294 (69)	262 (74)	290 (70)
		AG	119 (28)	81 (23)	114 (27)	0.99 (0.72-1.34)	1.33 (0.95-1.87)	0.76 (0.55-1.06)
		GG	11 (3)	13 (4)	11 (3)	1.03 (0.43-2.43)	0.72 (0.31-1.66)	1.34 (0.59-3.04)
						p-trend=0.9656	p-trend=0.4174	p-trend=0.3960
CASP7	RS11196411	CC	345 (82)	306 (87)	347 (84)
		CT	75 (18)	46 (13)	64 (16)	0.91 (0.63-1.32)	1.37 (0.90-2.09)	0.69 (0.46-1.03)
		TT	0 ()	0 ()	0 ()	(-)	(-)	(-)
						p-trend=0.6063	p-trend=0.1421	p-trend=0.0661
CASP7	RS11196418	GG	390 (92)	329 (93)	382 (92)
		AG	35 (8)	26 (7)	30 (7)	0.86 (0.51-1.44)	0.99 (0.57-1.74)	0.88 (0.52-1.50)
		AA	0 (0)	0 (0)	1 (0)	146448 (0.00-I)	111691 (0.00-I)	(-)
						p-trend=0.7190	p-trend=0.8640	p-trend=0.6424
CASP7	RS11196431	TT	385 (91)	325 (91)	381 (92)
		AT	40 (9)	31 (9)	33 (8)	0.79 (0.49-1.30)	0.87 (0.51-1.47)	0.92 (0.56-1.51)
		AA	0 (0)	0 (0)	1 (0)	241513 (0.00-I)	215603 (0.00-I)	(-)
						p-trend=0.5232	p-trend=0.7968	p-trend=0.7426
CASP7	RS11196449	TT	114 (27)	100 (28)	106 (26)
		CT	208 (49)	167 (47)	214 (52)	1.07 (0.77-1.49)	1.25 (0.88-1.78)	0.92 (0.66-1.29)
		CC	102 (24)	89 (25)	95 (23)	0.98 (0.66-1.44)	0.96 (0.64-1.45)	1.00 (0.68-1.48)
						p-trend=0.9213	p-trend=0.9098	p-trend=0.9936
CASP7	RS11196454	CC	305 (72)	261 (73)	296 (71)
		CT	112 (26)	92 (26)	106 (26)	0.95 (0.70-1.30)	1.01 (0.72-1.40)	0.96 (0.70-1.33)
		TT	8 (2)	3 (1)	13 (3)	1.58 (0.64-3.90)	2.97 (0.83-10.67)	0.44 (0.11-1.66)
						p-trend=0.7793	p-trend=0.3745	p-trend=0.4658
CASP7	RS11593766	TT	357 (84)	306 (86)	340 (82)
		GT	64 (15)	48 (13)	68 (16)	1.07 (0.73-1.55)	1.27 (0.84-1.92)	0.88 (0.59-1.32)
		GG	4 (1)	2 (1)	7 (2)	1.84 (0.52-6.49)	2.80 (0.57-13.81)	0.56 (0.10-3.06)
						p-trend=0.4482	p-trend=0.1070	p-trend=0.4040
CASP7	RS12249629	GG	329 (77)	290 (81)	325 (78)
		AG	89 (21)	60 (17)	81 (20)	0.98 (0.69-1.38)	1.32 (0.90-1.93)	0.76 (0.53-1.10)
		AA	7 (2)	6 (2)	9 (2)	1.40 (0.51-3.85)	1.36 (0.47-3.93)	0.97 (0.32-2.92)
						p-trend=0.8196	p-trend=0.1449	p-trend=0.2160
CASP7	RS12358301	TT	157 (37)	133 (37)	144 (35)
		CT	200 (47)	159 (45)	214 (52)	1.15 (0.85-1.56)	1.29 (0.94-1.78)	0.94 (0.69-1.29)
		CC	67 (16)	64 (18)	57 (14)	0.93 (0.61-1.43)	0.84 (0.54-1.30)	1.12 (0.74-1.70)
						p-trend=0.9541	p-trend=0.8754	p-trend=0.7263
CASP7	RS12415607	CC	284 (67)	226 (63)	272 (66)
		AC	127 (30)	121 (34)	132 (32)	1.06 (0.79-1.44)	0.88 (0.64-1.20)	1.21 (0.89-1.64)
[truncated: 26,562 more rows]
